# Supplementary material for: The association between periodontal disease and adverse pregnancy outcomes: a bibliometric analysis from 2000 to 2023
Source: Front Med (Lausanne). 2025 Jan 21;12:1526406. doi: 10.3389/fmed.2025.1526406 (PMC11790436; doi:10.3389/fmed.2025.1526406)
Supplement: Supplementary Table 7 — Literature co-citation ranking. [file Table_7.xlsx]

## Sheet: Sheet1
Frequency	BC	Year	Article
96	0.77	2006	Michalowicz BS, 2006, NEW ENGL J MED, V355, P1885, DOI 10.1056/NEJMoa062249
64	0.1	2003	Jeffcoat MK, 2003, J PERIODONTOL, V74, P1214, DOI 10.1902/jop.2003.74.8.1214
63	0.04	2006	Xiong X, 2006, BJOG-INT J OBSTET GY, V113, P135, DOI 10.1111/j.1471-0528.2005.00827.x
61	1	2009	Offenbacher S, 2009, OBSTET GYNECOL, V114, P551, DOI 10.1097/AOG.0b013e3181b1341f
57	0.86	2002	López NJ, 2002, J PERIODONTOL, V73, P911, DOI 10.1902/jop.2002.73.8.911
54	0.86	2002	Davenport ES, 2002, J DENT RES, V81, P313, DOI 10.1177/154405910208100505
52	0	2008	Goldenberg RL, 2008, LANCET, V371, P75, DOI 10.1016/S0140-6736(08)60074-4
51	0.81	2001	Jeffcoat MK, 2001, J AM DENT ASSOC, V132, P875, DOI 10.14219/jada.archive.2001.0299
50	0.02	2006	Offenbacher S, 2006, OBSTET GYNECOL, V107, P29, DOI 10.1097/01.AOG.0000190212.87012.96
48	0.06	2002	López NJ, 2002, J DENT RES, V81, P58, DOI 10.1177/154405910208100113
45	0.08	2004	Moore S, 2004, BRIT DENT J, V197, P251, DOI 10.1038/sj.bdj.4811620
40	0.77	2001	Mitchell-Lewis D, 2001, EUR J ORAL SCI, V109, P34, DOI 10.1034/j.1600-0722.2001.00966.x
39	0.83	2013	Ide M, 2013, J CLIN PERIODONTOL, V40, PS181, DOI 10.1111/jcpe.12063
37	1.09	2009	Newnham JP, 2009, OBSTET GYNECOL, V114, P1239, DOI 10.1097/AOG.0b013e3181c15b40
36	0.02	2014	Aagaard K, 2014, SCI TRANSL MED, V6, P0, DOI 10.1126/scitranslmed.3008599
36	0.22	2005	López NJ, 2005, J PERIODONTOL, V76, P2144, DOI 10.1902/jop.2005.76.11-S.2144
36	0	2001	Offenbacher S, 2001, ANN PERIODONTOL, V6, P164, DOI 10.1902/annals.2001.6.1.164
34	0.02	2005	Buduneli N, 2005, J CLIN PERIODONTOL, V32, P174, DOI 10.1111/j.1600-051X.2005.00670.x
34	0.19	2005	Dörtbudak O, 2005, J CLIN PERIODONTOL, V32, P45, DOI 10.1111/j.1600-051X.2004.00630.x
31	0.26	2019	Manrique-Corredor EJ, 2019, COMMUNITY DENT ORAL, V47, P243, DOI 10.1111/cdoe.12450
30	0.8	2013	Madianos PN, 2013, J CLIN PERIODONTOL, V40, PS170, DOI 10.1902/jop.2013.1340015
30	0.8	2001	Madianos P N, 2001, ANN PERIODONTOL, V6, P175, DOI 10.1902/annals.2001.6.1.175
29	0.02	2004	Goepfert AR, 2004, OBSTET GYNECOL, V104, P777, DOI 10.1097/01.AOG.0000139836.47777.6d
28	0.55	2018	Daalderop L A, 2018, JDR CLIN TRANS RES, V3, P10, DOI 10.1177/2380084417731097
27	0.78	2006	Offenbacher S, 2006, J PERIODONTOL, V77, P2011, DOI 10.1902/jop.2006.060047
27	1.01	2007	Tarannum F, 2007, J PERIODONTOL, V78, P2095, DOI 10.1902/jop.2007.060388
26	0.18	2010	Polyzos NP, 2010, BMJ-BRIT MED J, V341, P0, DOI 10.1136/bmj.c7017
24	0.68	2015	Ao M, 2015, PLOS ONE, V10, P0, DOI 10.1371/journal.pone.0137249
24	0.19	2020	Figuero E, 2020, PERIODONTOL 2000, V83, P175, DOI 10.1111/prd.12295
24	0.54	2018	Puertas A, 2018, J MATERN-FETAL NEO M, V31, P597, DOI 10.1080/14767058.2017.1293023
23	0	2009	Polyzos NP, 2009, AM J OBSTET GYNECOL, V200, P225, DOI 10.1016/j.ajog.2008.09.020
23	0.2	2005	Jarjoura K, 2005, AM J OBSTET GYNECOL, V192, P513, DOI 10.1016/j.ajog.2004.07.018
23	0.02	2008	Manau C, 2008, J CLIN PERIODONTOL, V35, P385, DOI 10.1111/j.1600-051X.2008.01222.x
22	0.07	2020	Bobetsis YA, 2020, PERIODONTOL 2000, V83, P154, DOI 10.1111/prd.12294
21	0.18	2007	Xiong X, 2007, OBSTET GYNECOL SURV, V62, P605, DOI 10.1097/01.ogx.0000279292.63435.40
21	0.02	2003	Boggess KA, 2003, OBSTET GYNECOL, V101, P227, DOI 10.1016/S0029-7844(02)02314-1
20	0.19	2005	Boggess KA, 2005, AM J OBSTET GYNECOL, V193, P1121, DOI 10.1016/j.ajog.2005.05.050
20	0	2019	Komine-Aizawa S, 2019, J OBSTET GYNAECOL RE, V45, P5, DOI 10.1111/jog.13782
18	0.02	2008	Agueda A, 2008, J CLIN PERIODONTOL, V35, P16, DOI 10.1111/j.1600-051X.2007.01166.x
17	0	2013	Sanz M, 2013, J PERIODONTOL, V84, PS164, DOI 10.1902/jop.2013.1340016
16	0.1	2010	Macones GA, 2010, AM J OBSTET GYNECOL, V202, P0, DOI 10.1016/j.ajog.2009.10.892
15	0	2017	Iheozor-Ejiofor Z, 2017, COCHRANE DB SYST REV, V0, P0, DOI 10.1002/14651858.CD005297.pub3
15	0.02	2010	Han YPW, 2010, OBSTET GYNECOL, V115, P442, DOI 10.1097/AOG.0b013e3181cb9955
15	0.26	2004	Radnai M, 2004, J CLIN PERIODONTOL, V31, P736, DOI 10.1111/j.1600-051X.2004.00564.x
15	0.04	2008	Wimmer G, 2008, J CLIN PERIODONTOL, V35, P380, DOI 10.1111/j.1600-051X.2008.01284.x
14	0.1	2009	Srinivas SK, 2009, AM J OBSTET GYNECOL, V200, P0, DOI 10.1016/j.ajog.2009.03.003
14	0.1	2011	Chambrone L, 2011, J CLIN PERIODONTOL, V38, P902, DOI 10.1111/j.1600-051X.2011.01761.x
14	0.04	2016	Teshome A, 2016, PAN AFR MED J, V24, P0, DOI 10.11604/pamj.2016.24.215.8727
13	0.02	2011	Chambrone L, 2011, J CLIN PERIODONTOL, V38, P795, DOI 10.1111/j.1600-051X.2011.01755.x
13	0.14	2005	Noack B, 2005, J PERIODONTAL RES, V40, P339, DOI 10.1111/j.1600-0765.2005.00808.x
13	0	2007	Barak S, 2007, J PERIODONTOL, V78, P670, DOI 10.1902/jop.2007.060362
13	0	2001	Dasanayake AP, 2001, J PERIODONTOL, V72, P1491, DOI 10.1902/jop.2001.72.11.1491
13	0	2001	Gibbs R S, 2001, ANN PERIODONTOL, V6, P153, DOI 10.1902/annals.2001.6.1.153
13	0	2012	Blencowe H, 2012, LANCET, V379, P2162, DOI 10.1016/S0140-6736(12)60820-4
12	0	2014	Romero R, 2014, SCIENCE, V345, P760, DOI 10.1126/science.1251816
12	0	2020	Ye CC, 2020, CLIN ORAL INVEST, V24, P4261, DOI 10.1007/s00784-020-03287-4
12	0.02	2017	Cobb CM, 2017, INT J WOMENS HEALTH, V9, P0, DOI 10.2147/IJWH.S142730
12	0.02	2007	Tonetti MS, 2007, NEW ENGL J MED, V356, P911, DOI 10.1056/NEJMoa063186
11	0	2016	Corbella S, 2016, QUINTESSENCE INT, V47, P193, DOI 10.3290/j.qi.a34980
11	0.97	2009	Radnai M, 2009, J DENT RES, V88, P280, DOI 10.1177/0022034508330229
11	0.2	2011	Jeffcoat M, 2011, BJOG-INT J OBSTET GY, V118, P250, DOI 10.1111/j.1471-0528.2010.02713.x
10	0	2011	Fogacci MF, 2011, OBSTET GYNECOL, V117, P153, DOI 10.1097/AOG.0b013e3181fdebc0
10	0	2013	Abati S, 2013, J MATERN-FETAL NEO M, V26, P369, DOI 10.3109/14767058.2012.733776
10	0.01	2018	Vander Haar EL, 2018, ANAEROBE, V50, P55, DOI 10.1016/j.anaerobe.2018.01.008
10	0	2003	Hasegawa K, 2003, J PERIODONTOL, V74, P1764, DOI 10.1902/jop.2003.74.12.1764
9	0	2015	Penova-Veselinovic B, 2015, J REPROD IMMUNOL, V112, P1, DOI 10.1016/j.jri.2015.05.002
9	0.55	2015	Hajishengallis G, 2015, NAT REV IMMUNOL, V15, P30, DOI 10.1038/nri3785
9	0	2004	Canakci V, 2004, AUST NZ J OBSTET GYN, V44, P568, DOI 10.1111/j.1479-828X.2004.00323.x
9	0.08	2016	Abariga SA, 2016, BMC PREGNANCY CHILDB, V16, P0, DOI 10.1186/s12884-016-1145-z
9	0.02	1998	Offenbacher S, 1998, ANN PERIODONTOL, V3, P233, DOI 10.1902/annals.1998.3.1.233
8	0	2018	Balan P, 2018, FRONT MICROBIOL, V9, P0, DOI 10.3389/fmicb.2018.02360
8	0	2005	Moreu G, 2005, J CLIN PERIODONTOL, V32, P622, DOI 10.1111/j.1600-051X.2005.00722.x
8	0	2008	Siqueira FM, 2008, J PERIODONTOL, V79, P207, DOI 10.1902/jop.2008.070174
8	0.02	2021	Bi WG, 2021, J MATERN-FETAL NEO M, V34, P3259, DOI 10.1080/14767058.2019.1678142
7	0.04	2016	Vanterpool SF, 2016, PLOS ONE, V11, P0, DOI 10.1371/journal.pone.0146157
7	0	2015	Blanc V, 2015, ORAL DIS, V21, P905, DOI 10.1111/odi.12364
7	0	2002	Romero BC, 2002, J PERIODONTOL, V73, P1177, DOI 10.1902/jop.2002.73.10.1177
7	0	2008	Novak MJ, 2008, J PERIODONTOL, V79, P1870, DOI 10.1902/jop.2008.070554
7	0	2006	Boggess KA, 2006, MATERN CHILD HLTH J, V10, PS169, DOI 10.1007/s10995-006-0095-x
7	0.16	2005	Lunardelli AN, 2005, J CLIN PERIODONTOL, V32, P938, DOI 10.1111/j.1600-051X.2005.00759.x
7	0.02	2006	Sadatmansouri S, 2006, J INDIAN SOC PEDOD PREV DENT, V24, P23
7	0	2006	Radnai M, 2006, J CLIN PERIODONTOL, V33, P791, DOI 10.1111/j.1600-051X.2006.00986.x
6	0.15	2005	Moliterno LFM, 2005, J CLIN PERIODONTOL, V32, P886, DOI 10.1111/j.1600-051X.2005.00781.x
6	0.08	2021	Pockpa ZAD, 2021, ORAL HLTH PREV DENT, V19, P77, DOI 10.3290/j.ohpd.b898969
6	0	2017	Ren HY, 2017, FRONT IMMUNOL, V8, P0, DOI 10.3389/fimmu.2017.00139
6	0	2007	León R, 2007, J PERIODONTOL, V78, P1249, DOI 10.1902/jop.2007.060368
6	0	2008	Michalowicz BS, 2008, J AM DENT ASSOC, V139, P685, DOI 10.14219/jada.archive.2008.0250
6	0.78	2007	Gazolla CM, 2007, J PERIODONTOL, V78, P842, DOI 10.1902/jop.2007.060295
6	0	2013	Michalowicz BS, 2013, J CLIN PERIODONTOL, V40, PS195, DOI 10.1111/jcpe.12081
6	0	2019	Chawanpaiboon S, 2019, LANCET GLOB HEALTH, V7, PE37, DOI 10.1016/S2214-109X(18)30451-0
6	0	2005	Pihlstrom BL, 2005, LANCET, V366, P1809, DOI 10.1016/S0140-6736(05)67728-8
6	0	2000	Goldenberg RL, 2000, NEW ENGL J MED, V342, P1500, DOI 10.1056/NEJM200005183422007
6	0	2006	Contreras A, 2006, J PERIODONTOL, V77, P182, DOI 10.1902/jop.2006.050020
6	0	2019	Caneiro-Queija L, 2019, INT J ENV RES PUB HE, V16, P0, DOI 10.3390/ijerph16193638
6	0	2018	Gesase N, 2018, AFR HEALTH SCI, V18, P601, DOI 10.4314/ahs.v18i3.18
6	0	2004	Holbrook WP, 2004, ACTA ODONTOL SCAND, V62, P177, DOI 10.1080/00016350410001522
6	0	2006	Vettore Mario Vianna, 2006, CAD. SAÚDE PÚBLICA, V22, P2041, DOI 10.1590/S0102-311X2006001000010
6	0.02	2020	Konopka T, 2020, GINEKOL POL, V91, P158, DOI 10.5603/GP.2020.0024
6	0	2005	Al Habashneh R, 2005, J CLIN PERIODONTOL, V32, P815, DOI 10.1111/j.1600-051X.2005.00739.x
6	0	2008	Vettore MV, 2008, J DENT RES, V87, P73, DOI 10.1177/154405910808700113
6	0	2007	Bassani DG, 2007, J CLIN PERIODONTOL, V34, P31, DOI 10.1111/j.1600-051X.2006.01012.x
6	0	2009	Michalowicz BS, 2009, J CLIN PERIODONTOL, V36, P308, DOI 10.1111/j.1600-051X.2009.01385.x
6	0.04	2005	Khader YS, 2005, J PERIODONTOL, V76, P161, DOI 10.1902/jop.2005.76.2.161
6	0	1996	Offenbacher S, 1996, J PERIODONTOL, V67, P1103, DOI 10.1902/jop.1996.67.10s.1103
6	0.04	2005	Moore S, 2005, J CLIN PERIODONTOL, V32, P1, DOI 10.1111/j.1600-051X.2004.00598.x
6	0	2005	Marin C, 2005, J CLIN PERIODONTOL, V32, P299, DOI 10.1111/j.1600-051X.2005.00661.x
6	0.02	2018	Tonetti MS, 2018, J CLIN PERIODONTOL, V45, PS149, DOI 10.1111/jcpe.12945
5	0	2002	Madianos PN, 2002, J CLIN PERIODONTOL, V29, P22, DOI 10.1034/j.1600-051X.29.s3.2.x
5	0	2011	Hasegawa-Nakamura K, 2011, J PERIODONTAL RES, V46, P497, DOI 10.1111/j.1600-0765.2011.01366.x
5	0.06	2011	Oliveira AMSD, 2011, CLIN ORAL INVEST, V15, P609, DOI 10.1007/s00784-010-0424-8
5	0	1998	Davenport E S, 1998, ANN PERIODONTOL, V3, P213, DOI 10.1902/annals.1998.3.1.213
5	0	2009	Katz J, 2009, J DENT RES, V88, P575, DOI 10.1177/0022034509338032
5	0.02	2014	Macedo JF, 2014, J PERIODONTAL RES, V49, P458, DOI 10.1111/jre.12124
5	0.1	2020	Caneiro L, 2020, ORAL HLTH PREV DENT, V18, P77, DOI 10.3290/j.ohpd.a44116
5	0	2015	Wu M, 2015, MEDIAT INFLAMM, V2015, P0, DOI 10.1155/2015/623427
5	0.06	2017	Nazir Muhammad Ashraf, 2017, INT J HEALTH SCI (QASSIM), V11, P72
5	0	2009	Han YW, 2009, J CLIN MICROBIOL, V47, P38, DOI 10.1128/JCM.01206-08
5	0	2018	Latorre Uriza Catalina, 2018, INFECT DIS OBSTET GYNECOL, V2018, P7027683, DOI 10.1155/2018/7027683
5	0	2019	Bui FQ, 2019, BIOMED J, V42, P27, DOI 10.1016/j.bj.2018.12.001
5	0	2012	Corbella S, 2012, ODONTOLOGY, V100, P232, DOI 10.1007/s10266-011-0036-z
5	0	2020	Lavigne Salme E, 2020, CAN J DENT HYG, V54, P92
5	0.02	2017	[Anonymous], 2017, COCHRANE DB SYST REV, V0, P0
5	0.04	2004	Han YPW, 2004, INFECT IMMUN, V72, P2272, DOI 10.1128/IAI.72.4.2272-2279.2004
5	0.06	2013	Weidlich P, 2013, CLIN ORAL INVEST, V17, P37, DOI 10.1007/s00784-012-0679-3
5	0	2009	Khader Y, 2009, ARCH GYNECOL OBSTET, V279, P165, DOI 10.1007/s00404-008-0696-2
5	0	2021	Raju K, 2021, PERIODONTOL 2000, V87, P132, DOI 10.1111/prd.12394
5	0	2019	Dominy SS, 2019, SCI ADV, V5, P0, DOI 10.1126/sciadv.aau3333
5	0	2016	Cappelletti M, 2016, J LEUKOCYTE BIOL, V99, P67, DOI 10.1189/jlb.3MR0615-272RR
4	0.89	2011	Jeffcoat M, 2011, AM J OBSTET GYNECOL, V205, P0, DOI 10.1016/j.ajog.2011.07.016
4	0.02	2015	Mawardi HH, 2015, SAUDI MED J, V36, P150, DOI 10.15537/smj.2015.2.9424
4	0.02	2012	Kim AJ, 2012, J PERIODONTOL, V83, P1508, DOI 10.1902/jop.2012.110636
4	0.04	2015	Schwendicke F, 2015, PLOS ONE, V10, P0, DOI 10.1371/journal.pone.0129060
4	0.08	2011	Fardini Y, 2011, MOL MICROBIOL, V82, P1468, DOI 10.1111/j.1365-2958.2011.07905.x
4	0.02	2019	Beck JD, 2019, J DENT RES, V98, P1053, DOI 10.1177/0022034519846113
4	0	2013	Van Dyke TE, 2013, J PERIODONTOL, V84, PS1, DOI 10.1111/jcpe.12088
4	0	2013	Brocklehurst P, 2013, COCHRANE DB SYST REV, V0, P0, DOI 10.1002/14651858.CD000262.pub4
4	0	2002	Bearfield C, 2002, BJOG-INT J OBSTET GY, V109, P527, DOI 10.1016/S1470-0328(02)01349-6
4	0.8	2012	Carrillo-de-Albornoz A, 2012, J CLIN PERIODONTOL, V39, P272, DOI 10.1111/j.1600-051X.2011.01800.x
4	0.75	1998	Dasanayake A P, 1998, ANN PERIODONTOL, V3, P206, DOI 10.1902/annals.1998.3.1.206
3	0.24	1996	Beck J, 1996, J PERIODONTOL, V67, P1123, DOI 10.1902/jop.1996.67.10s.1123
3	0.04	2013	Cullinan MP, 2013, PERIODONTOL 2000, V62, P271, DOI 10.1111/prd.12007
3	0	1997	Ebersole JL, 1997, CLIN EXP IMMUNOL, V107, P347, DOI 10.1111/j.1365-2249.1997.270-ce1162.x
3	0	1998	Herzberg M C, 1998, ANN PERIODONTOL, V3, P151, DOI 10.1902/annals.1998.3.1.151
3	0	2013	Gonzales-Marin C, 2013, J MED MICROBIOL, V62, P133, DOI 10.1099/jmm.0.049452-0
3	0	2015	Basha S, 2015, ORAL HLTH PREV DENT, V13, P537, DOI 10.3290/j.ohpd.a34053
2	0	1999	Arbes SJ, 1999, J DENT RES, V78, P1777, DOI 10.1177/00220345990780120301
1	0	1996	Joshipura KJ, 1996, J DENT RES, V75, P1631, DOI 10.1177/00220345960750090301
1	0	1996	Sommerfelt K, 1996, DEV MED CHILD NEUROL, V38, P927
1	0	1997	Grossi SG, 1997, J PERIODONTOL, V68, P713, DOI 10.1902/jop.1997.68.8.713
1	0	1996	Papapanou P N, 1996, ANN PERIODONTOL, V1, P1, DOI 10.1902/annals.1996.1.1.1
1	0	1998	Grossi S G, 1998, ANN PERIODONTOL, V3, P51, DOI 10.1902/annals.1998.3.1.51
1	0.26	1995	Boon NA, 1995, DAVIDSONS PRINCIPLES, V0, P191
1	0	1998	Loesche WJ, 1998, PERIODONTOL 2000, V16, P80, DOI 10.1111/j.1600-0757.1998.tb00117.x
1	0	1998	Page R C, 1998, ANN PERIODONTOL, V3, P108, DOI 10.1902/annals.1998.3.1.108
1	0	1998	Deshpande RG, 1998, INFECT IMMUN, V66, P5337, DOI 10.1128/IAI.66.11.5337-5343.1998
1	0	1998	[Anonymous], 1998, CARDIOVASCULAR REVIEWS AND REPORTS, V0, P0
1	0	1995	EDWARDS CRW, 1995, DAVIDSONS PRINCIPLES, V0, P669
1	0.26	1995	ALDRIDGE JP, 1995, J CLIN PERIODONTOL, V22, P271, DOI 10.1111/j.1600-051X.1995.tb00147.x
1	0	1996	Offenbacher S, 1996, ANN PERIODONTOL, V1, P821, DOI 10.1902/annals.1996.1.1.821
1	0	1995	Lacassin F, 1995, EUR HEART J, V16, P1968, DOI 10.1093/oxfordjournals.eurheartj.a060855
1	0	1998	Kinane D F, 1998, ANN PERIODONTOL, V3, P142, DOI 10.1902/annals.1998.3.1.142
1	0	1996	Scannapieco FA, 1996, J PERIODONTOL, V67, P1114, DOI 10.1902/jop.1996.67.10s.1114
1	0	1998	Slots J, 1998, J DENT RES, V77, P1764, DOI 10.1177/00220345980770100101
1	0	1998	Scannapieco F A, 1998, ANN PERIODONTOL, V3, P251, DOI 10.1902/annals.1998.3.1.251
1	0	1998	[Anonymous], 1998, J PERIODONTOL, V69, P841
1	0	1995	MATTILA KJ, 1995, CLIN INFECT DIS, V20, P588, DOI 10.1093/clinids/20.3.588
1	0	1995	Navazesh M, 1995, SPEC CARE DENTIST, V15, P11, DOI 10.1111/j.1754-4505.1995.tb00466.x
1	0	1998	Weinberg A, 1998, CRIT REV ORAL BIOL M, V9, P399, DOI 10.1177/10454411980090040201
1	0	1996	Smith GT, 1996, J PERIODONTOL, V67, P794, DOI 10.1902/jop.1996.67.8.794
1	0	1995	Hillier SL, 1995, NEW ENGL J MED, V333, P1737, DOI 10.1056/NEJM199512283332604
1	0	1997	Grau AJ, 1997, STROKE, V28, P1724, DOI 10.1161/01.STR.28.9.1724
1	0	1997	Loesche WJ, 1997, CURR OPIN PERIODONT, V4, P21
1	0	1997	Darveau RP, 1997, PERIODONTOL 2000, V14, P12, DOI 10.1111/j.1600-0757.1997.tb00190.x
1	0	1998	Christgau M, 1998, J CLIN PERIODONTOL, V25, P112, DOI 10.1111/j.1600-051X.1998.tb02417.x
1	0	1998	Debelian G J, 1998, ANN PERIODONTOL, V3, P281, DOI 10.1902/annals.1998.3.1.281
1	0	1996	Herzberg MC, 1996, J PERIODONTOL, V67, P1138, DOI 10.1902/jop.1996.67.10s.1138
1	0.02	1996	Breslau N, 1996, J ABNORM CHILD PSYCH, V24, P385, DOI 10.1007/BF01441637
1	0	1998	Genco RJ, 1998, COMPENDIUM, V19, P40
1	0	1995	OKABE K, 1995, INT J ORAL MAX SURG, V24, P239, DOI 10.1016/S0901-5027(06)80137-2
1	0	1998	Drangsholt M T, 1998, ANN PERIODONTOL, V3, P184, DOI 10.1902/annals.1998.3.1.184
1	0	1997	Roberts GJ, 1997, PEDIATR CARDIOL, V18, P24, DOI 10.1007/s002469900103
1	0	1998	Okuda K, 1998, BULL TOKYO DENT COLL, V39, P165
1	0	1995	Cull RE, 1995, DAVIDSONS PRINCIPLES, V0, P1021
1	0	1997	Ridker PM, 1997, NEW ENGL J MED, V336, P973, DOI 10.1056/NEJM199704033361401
1	0	1998	Offenbacher S, 1998, J DENT EDUC, V62, P852
1	0	1995	DEBELIAN GJ, 1995, ENDOD DENT TRAUMATOL, V11, P142
