# Supplementary material for: The association between periodontal disease and adverse pregnancy outcomes: a bibliometric analysis from 2000 to 2023
Source: Front Med (Lausanne). 2025 Jan 21;12:1526406. doi: 10.3389/fmed.2025.1526406 (PMC11790436; doi:10.3389/fmed.2025.1526406)
Supplement: Supplementary Table 15 — Quantitative statistics for each study design on PD and APOs [Sheet1: Details of the articles retrieved for each study design; Sheet 2: For specific research design (Animal study, Cross-sectional study, Prospective cohort study, Case-control study, RCT (intervention study), Systematic review), the first three articles with the highest number of citations were collated]. [file Table_15.xlsx]

## Sheet: Sheet1
Quantitative statistics for each study design on PD and APOs
Sheet1：Details of the articles retrieved for each study design
Sheet2：For specific research design ( Animal study, Cross-sectional study, Prospective cohort study, Case-control study, RCT ( intervention study ), Systematic review ), the first three articles with the highest number of citations were collated.
Study design type	Amounts
Case-control study	109	1
Cross-sectional study	76	1
Systematic review	61	1
Prospective cohort study	55	1
Animal study	37	1
RCT (intervention study)	37	1
Comparative Study	28
Prevalence study	17
Case reports	5
Retrospective cohort study	3
			Basic Information of Literature							Detailed content of the literature
Study design type	Rank	Study design	Title	DOI/PMID	Authors	Year	Journal	Citations		Model of periodontitis/ Characteristics of population	sample size	Parameter evaluation/ outcome indicators	main findings
Animal study	1	animal model	<i>Fusobacterium nucleatum</i> induces premature and term stillbirths in pregnant mice:: Implication of oral bacteria in preterm birth	10.1128/IAI.72.4.2272-2279.2004	Han, YPW; Redline, RW; Li, M; Yin, LH; Hill, GB; McCormick, TS	2004	INFECTION AND IMMUNITY	311		(F. nucleatum) was directly injected via the tail vein into pregnant CF-1 mice	each groups of 3 to 12 pregnant mice to determine the LD50 (median lethal dose)	fetal death rate, stillbirth rate, and the distribution and quantity of F. nucleatum in the mouse placenta, liver, spleen, amniotic fluid, and fetuses	F. nucleatum could cause premature birth, stillbirth, and non-sustained live births in mice, with infection localized within the uterus without systemic spread. F. nucleatum was first detected in placental blood vessels and then spread to amniotic fluid, mimicking the pattern of human infection.
	2	animal model	Transmission of Diverse Oral Bacteria to Murine Placenta: Evidence for the Oral Microbiome as a Potential Source of Intrauterine Infection	10.1128/IAI.01395-09	Fardini, Yann; Chung, Peter; Dumm, Rochelle; Joshi, Nishiant; Han, Yiping W.	2010	INFECTION AND IMMUNITY	191		pooled oral bacterial samples, including saliva and subgingival plaque, were injected into pregnant mice via the tail vein to mimic bacteremia	Saliva samples were injected into seven pregnant mice, and subgingival plaque samples were injected into ten pregnant mice	The colonization of oral bacteria in murine placentas was evaluated using 16S rRNA gene-based PCR and clone library analysis, along with a variety of bacterial species associated with adverse pregnancy outcomes in humans	a diverse group of oral bacteria can translocate to the murine placenta via hematogenous transmission, many of which are associated with adverse pregnancy outcomes in humans, including preterm birth. Additionally, several species were selectively "enriched" during translocation, with higher prevalence in the placenta than in the pooled saliva or subgingival plaque samples
	3	animal model	Maternal LPS induces cytokines in the amniotic fluid and corticotropin releasing hormone in the fetal rat brain	10.1152/ajpregu.00664.2003	Gayle, DA; Beloosesky, R; Desai, M; Amidi, F; Nuñez, SE; Ross, MG	2004	AMERICAN JOURNAL OF PHYSIOLOGY-REGULATORY INTEGRATIVE AND COMPARATIVE PHYSIOLOGY	177		intraperitoneal injections of lipopolysaccharide (LPS) in pregnant rats	a total of 32 pups analyzed per group	Cytokine protein levels in maternal serum and amniotic fluid were determined by ELISA, and mRNA levels in the placenta, chorioamnion, and fetal brain were measured by real-time RT-PCR	maternal LPS injection induced changes in the mRNA and protein levels of proinflammatory cytokines (IL-1β, IL-6, TNF-α) and the anti-inflammatory cytokine (IL-10) in maternal serum and amniotic fluid. Additionally, LPS induced upregulation of the stress-related peptide corticotropin-releasing factor (CRF) mRNA in the fetal brain
	4	animal model	Fap2 of <i>Fusobacterium nucleatum</i> Is a Galactose-Inhibitable Adhesin Involved in Coaggregation, Cell Adhesion, and Preterm Birth	10.1128/IAI.02838-14	Coppenhagen-Glazer, S.; Sol, A.; Abed, J.; Naor, R.; Zhang, X.; Han, Y. W.; Bachrach, G.	2015	INFECTION AND IMMUNITY	160
	5	animal model	Bacterial infection promotes DNA hypermethylation	10.1177/154405910708600212	Bobetsis, Y. A.; Barros, S. P.; Lin, D. M.; Weidman, J. R.; Dolinoy, D. C.; Jirtle, R. L.; Boggess, K. A.; Beck, J. D.; Offenbacher, S.	2007	JOURNAL OF DENTAL RESEARCH	103
	6	animal model	Dental Infection of <i>Porphyromonas gingivalis</i> Induces Preterm Birth in Mice	10.1371/journal.pone.0137249	Ao, Min; Miyauchi, Mutsumi; Furusho, Hisako; Inubushi, Toshihiro; Kitagawa, Masae; Nagasaki, Atsuhiro; Sakamoto, Shinichi; Kozai, Katsuyuki; Takata, Takashi	2015	PLOS ONE	69
	7	animal model	Maternal exposure to endotoxin delays alveolarization during postnatal rat lung development	10.1152/ajplung.90405.2008	Cao, Lei; Wang, Jinxia; Tseu, Irene; Luo, Daochun; Post, Martin	2009	AMERICAN JOURNAL OF PHYSIOLOGY-LUNG CELLULAR AND MOLECULAR PHYSIOLOGY	51
	8	animal model	The effects of intra-amniotic injection of periodontopathic lipopolysaccharides in sheep	10.1016/j.ajog.2005.03.065	Newnham, JP; Shub, A; Jobe, AH; Bird, PS; Ikegami, M; Nitsos, I; Moss, TJM	2005	AMERICAN JOURNAL OF OBSTETRICS AND GYNECOLOGY	36
	9	animal model	Colonization of maternal and fetal tissues by <i>Porphyromonas gingivalis</i> is strain-dependent in a rodent animal model	10.1016/j.ajog.2007.11.067	Belanger, Myriam; Reyes, Leticia; von Deneen, Karen; Reinhard, Mary K.; Progulske-Fox, Ann; Brown, Mary B.	2008	AMERICAN JOURNAL OF OBSTETRICS AND GYNECOLOGY	35
	10	animal model	Periodontal pathogen <i>Aggregatibacter actinomycetemcomitans</i> LPS induces mitochondria-dependent-apoptosis in human placental trophoblasts	10.1016/j.placenta.2010.10.007	Li, Y.; Shibata, Y.; Zhang, L.; Kuboyama, N.; Abiko, Y.	2011	PLACENTA	31
	11	animal model	Galectin-3 Plays an Important Role in Preterm Birth Caused by Dental Infection of <i>Porphyromonas gingivalis</i>	10.1038/s41598-018-21072-y	Miyauchi, Mutsumi; Ao, Min; Furusho, Hisako; Chea, Chanbora; Nagasaki, Atsuhiro; Sakamoto, Shinnichi; Ando, Toshinori; Inubushi, Toshihiro; Kozai, Katsuyuki; Takata, Takashi	2018	SCIENTIFIC REPORTS	27
	12	animal model	Characterization of the invasive and inflammatory traits of oral <i>Campylobacter rectus</i> in a murine model of fetoplacental growth restriction and in trophoblast cultures	10.1016/j.jri.2009.11.003	Arce, R. M.; Diaz, P. I.; Barros, S. P.; Galloway, P.; Bobetsis, Y.; Threadgill, D.; Offenbacher, S.	2010	JOURNAL OF REPRODUCTIVE IMMUNOLOGY	27
	13	animal study	The effect of <i>Porphyromonas gingivalis</i> lipopolysaccharide on pregnancy in the rat	10.1111/odi.12177	Kunnen, A.; van Pampus, M. G.; Aarnoudse, J. G.; van der Schans, C. P.; Abbas, F.; Faas, M. M.	2014	ORAL DISEASES	25
	14	animal study	Effects of induced periapical abscesses on rat pregnancy outcomes	10.1016/j.archoralbio.2008.09.016	Bain, J. L.; Lester, S. R.; Henry, W. D.; Naftel, J. P.; Johnson, R. B.	2009	ARCHIVES OF ORAL BIOLOGY	22
	15	animal study	Effect of <i>Porphyromonas gingivalis</i> infection in the placenta and umbilical cord in pregnant mice with low birth weight	10.1080/00016357.2018.1426876	Udagawa, Sayuri; Katagiri, Sayaka; Maekawa, Shogo; Takeuchi, Yasuo; Komazaki, Rina; Ohtsu, Anri; Sasaki, Naoki; Shiba, Takahiko; Watanabe, Kazuki; Ishihara, Kazuyuki; Sato, Noriko; Miyasaka, Naoyuki; Izumi, Yuichi	2018	ACTA ODONTOLOGICA SCANDINAVICA	20
	16	animal study	Abnormal Pregnancy Outcomes in Mice Using an Induced Periodontitis Model and the Haematogenous Migration of <i>Fusobacterium nucleatum</i> Sub-Species to the Murine Placenta	10.1371/journal.pone.0120050	Stockham, Sara; Stamford, Justine E.; Roberts, Claire T.; Fitzsimmons, Tracy R.; Marchant, Ceilidh; Bartold, P. Mark; Zilm, Peter S.	2015	PLOS ONE	20
	17	animal study	Systemic inflammatory responses in progressing periodontitis during pregnancy in a baboon model	10.1111/j.1365-2249.2010.04202.x	Ebersole, J. L.; Steffen, M. J.; Holt, S. C.; Kesavalu, L.; Chu, L.; Cappelli, D.	2010	CLINICAL AND EXPERIMENTAL IMMUNOLOGY	18
	18	animal study	Porphyromonas gingivalis infection at different gestation periods on fetus development and cytokines profile	10.1111/j.1601-0825.2012.01917.x	Michelin, M. C. A. N.; Teixeira, S. R. L.; Ando-Suguimoto, E. S.; Lucas, S. R. R.; Mayer, M. P. A.	2012	ORAL DISEASES	15
	19	animal study	Effect of maternal periodontitis on GLUT4 and inflammatory pathway in adult offspring	10.1002/JPER.18-0568	de Lima Coutinho Mattera, Maria Sara; Chiba, Fernando Yamamoto; Lopes, Flavia Lombardi; Saori Tsosura, Thais Veronica; Peres, Maria Angelica; Balera Brito, Victor Gustavo; Penha de Oliveira, Sandra Helena; Pereira, Renato Felipe; Marani, Fernando; dos Santos, Rodrigo Martins; Belardi, Bianca Elvira; Lattari Tessarin, Gestter Willian; Benites, Mariana Lopes; Ervolino, Edilson; Heimann, Joel Claudi…	2019	JOURNAL OF PERIODONTOLOGY	14
	20	animal study	Maternal Supplementation of Low Dose Fluoride Alleviates Adverse Perinatal Outcomes Following Exposure to Intrauterine Inflammation	10.1038/s41598-018-38241-8	Jia, Bei; Zong, Lu; Lee, JiYeon; Lei, Jun; Zhu, Yan; Xie, Han; Clemens, Julia L.; Feller, Mia C.; Na, Quan; Dong, Jie; McLane, Michael W.; Jones-Beatty, Kimberly; Burd, Irina	2019	SCIENTIFIC REPORTS	12
	21	animal study	Periodontitis in pregnant baboons: systemic inflammation and adaptive immune responses and pregnancy outcomes in a baboon model	10.1111/jre.12099	Ebersole, J. L.; Holt, S. C.; Cappelli, D.	2014	JOURNAL OF PERIODONTAL RESEARCH	12
	22	animal study	The Fused Methionine Sulfoxide Reductase MsrAB Promotes Oxidative Stress Defense and Bacterial Virulence in Fusobacterium nucleatum	10.1128/mbio.03022-21	Scheible, Matthew; Nguyen, Cuong T.; Luong, Truc Thanh; Lee, Ju Huck; Chen, Yi-Wei; Chang, Chungyu; Wittchen, Manuel; Camacho, Martha I.; Tiner, Bethany L.; Wu, Chenggang; Tauch, Andreas; Das, Asis; Ton-That, Hung	2022	MBIO	11
	23	animal study	Maternal Periodontal Disease in Rats Decreases Insulin Sensitivity and Insulin Signaling in Adult Offspring	10.1902/jop.2012.110372	Shirakashi, Daisy J.; Leal, Rosana P.; Colombo, Natalia H.; Chiba, Fernando Y.; Garbin, Clea A. S.; Jardim, Elerson G., Jr.; Antoniali, Cristina; Sumida, Doris H.	2013	JOURNAL OF PERIODONTOLOGY	11
	24	animal study	Inhibition of gingipains prevents <i>Porphyromonas gingivalis</i>-induced preterm birth and fetal death in pregnant mice	10.1016/j.ejphar.2018.01.028	Takii, Ryosuke; Kadowaki, Tomoko; Tsukuba, Takayuki; Yamamoto, Kenji	2018	EUROPEAN JOURNAL OF PHARMACOLOGY	10
	25	animal study	Maternal periodontitis decreases plasma membrane GLUT4 content in skeletal muscle of adult offspring	10.1016/j.lfs.2016.02.010	de Lima Coutinho Mattera, Maria Sara; Chiba, Fernando Yamamoto; de Oliveira da Mota, Max Sander; Pereira, Renato Felipe; Ervolino, Edilson; Chaves Neto, Antonio Hernandes; Pescinini Salzedas, Leda Maria; Scaramele, Natalia Francisco; Silva, Cristina Antoniali; Okamoto, Maristela Mitiko; Machado, Ubiratan Fabres; Sumida, Doris Hissako	2016	LIFE SCIENCES	10
	26	animal study	Fetal Membrane Inflammation Induces Preterm Birth Via Toll-Like Receptor 2 in Mice With Chronic Gingivitis	10.1177/1933719118792097	Konishi, Haruhisa; Urabe, Satoshi; Miyoshi, Hiroshi; Teraoka, Yuko; Maki, Tomoko; Furusho, Hisako; Miyauchi, Mutsumi; Takata, Takashi; Kudo, Yoshiki; Kajioka, Shunichi	2019	REPRODUCTIVE SCIENCES	9
	27	animal study	No association between periodontitis, preterm birth, or intrauterine growth restriction: experimental study in Wistar rats	10.1016/j.ajog.2015.12.008	Fogacci, Mariana Fampa; Barbirato, Davi da Silva; Furtado Amaral, Cristine da Silva; da Silva, Priscilla Goncalves; Coelho, Mariana de Oliveira; Bertozi, Giuliana; de Carvalho, Denise Pires; Thome Leao, Anna Thereza	2016	AMERICAN JOURNAL OF OBSTETRICS AND GYNECOLOGY	9
	28	animal study	Fetal Weight Outcomes in C57BL/6J and C57BL/6NCrl Mice after Oral Colonization with <i>Porphyromonas gingivalis</i>	10.1128/IAI.00280-19	Fischer, Lori A.; Bittner-Eddy, Peter D.; Costalonga, Massimo	2019	INFECTION AND IMMUNITY	8
	29	animal study	<i>Porphyromonas gingivalis</i> Administration Induces Gestational Obesity, Alters Gene Expression in the Liver and Brown Adipose Tissue in Pregnant Mice, and Causes Underweight in Fetuses	10.3389/fcimb.2021.745117	Yoshida, Sumiko; Hatasa, Masahiro; Ohsugi, Yujin; Tsuchiya, Yosuke; Liu, Anhao; Niimi, Hiromi; Morita, Kazuki; Shimohira, Tsuyoshi; Sasaki, Naoki; Maekawa, Shogo; Shiba, Takahiko; Hirota, Tomomitsu; Okano, Tokuju; Hirose, Asuka; Ibi, Rinko; Noritake, Kanako; Tomiga, Yuki; Nitta, Hiroshi; Suzuki, Toshihiko; Takahashi, Hirokazu; Miyasaka, Naoyuki; Iwata, Takanori; Katagiri, Sayaka	2022	FRONTIERS IN CELLULAR AND INFECTION MICROBIOLOGY	6
	30	animal study	<i>Porphyromonas gingivalis</i>, a cause of preterm birth in mice, induces an inflammatory response in human amnion mesenchymal cells but not epithelial cells	10.1016/j.placenta.2020.07.016	Konishi, Haruhisa; Urabe, Satoshi; Teraoka, Yuko; Morishita, Yoshito; Koh, Iemasa; Sugimoto, Jun; Sakamoto, Shinnichi; Miyoshi, Hiroshi; Miyauchi, Mutsumi; Takata, Takashi; Kajioka, Shunichi; Kudo, Yoshiki	2020	PLACENTA	6
	31	animal study	Progesterone Suppresses Uterine Contraction by Reducing Odontogenic <i>Porphyromonas gingivalis</i> Induced Chronic Inflammation in Mice	10.3390/biom12081029	Teraoka, Yuko; Sugimoto, Jun; Konishi, Haruhisa; Miyoshi, Hiroshi; Furusho, Hisako; Miyauchi, Mutsumi; Kajioka, Shunichi; Koh, Iemasa; Kudo, Yoshiki	2022	BIOMOLECULES	4
	32	animal study	A new mixed model of periodontitis-induced preeclampsia: A pilot study	10.1111/jre.12869	Mata, Karina; Nobre, Atila Vinicius Vitor; Felix Silva, Pedro Henrique; Oliezer, Rene Seabra; Fernandes, Cleverson; Amaral, Jefferson; Ramos, Junia; Constante Gabriel Del-Arco, Marina; Messora, Michel Reis; Tanus-Santos, Jose Eduardo; Gerlach, Raquel Fernanda; Salvador, Sergio Luiz	2021	JOURNAL OF PERIODONTAL RESEARCH	4
	33	animal study	Evaluation of Gingivitis in Pregnant Beagle Dogs	10.1177/0898756419892202	Jennifer, Rawlinson; Williana, Basuki; Chad, Lothamer; Richard, Wheeler; Ben, Prytherch	2019	JOURNAL OF VETERINARY DENTISTRY	3
	34	animal study	Porphyromonas gingivalis outer membrane vesicles shape trophoblast cell metabolism impairing functions associated to adverse pregnancy outcome	10.1002/jcp.31138	Lara, Brenda; Loureiro, Inaki; Gliosca, Laura; Castagnola, Lara; Merech, Fatima; Gallino, Lucila; Calo, Guillermina; Sassot, Matias; Ramhorst, Rosanna; Vota, Daiana; Perez Leiros, Claudia; Hauk, Vanesa	2023	JOURNAL OF CELLULAR PHYSIOLOGY	2
	35	animal study	Anticardiolipin from Periodontitis Patients Impact Fetal Loss and Annexin V	10.1177/0022034520913244	Schenkein, H. A.; Thomas, R. R.	2020	JOURNAL OF DENTAL RESEARCH	2
	36	animal study	Effect of maternal true combined endodontic-periodontal lesion on insulin and inflammatory pathway in adult offspring	10.1002/JPER.22-0139	Belardi, Bianca Elvira; de Lima Coutinho Mattera, Maria Sara; Saori Tsosura, Thais Veronica; Dos Santos, Rodrigo Martins; Cantiga-Silva, Cristiane; Angelo Cintra, Luciano Tavares; Chiba, Fernando Yamamoto; Bravo, Lara Teschi; Carvalho, Nubia Ramos; Nascimento Carnevali, Ana Carolina; Fujii de Oliveira, Renan Akira; Ervolino, Edilson; Matsushita, Doris Hissako	2023	JOURNAL OF PERIODONTOLOGY	1
	37	animal study	Monitoring periodontal lesions and their effects during pregnancy: microbiological aspects of the oral cavity and amniotic fluid in pregnant ewes	10.1590/1678-5150-PVB-7160	Souza, Natalia C.; Ramost, Thamiris N. M.; Borsanelli, Ana Carolina; Saraiva, Julia R.; Ferreira, Evandro M.; Schweitzer, Christiane M.; Gaetti-Jardim Jr, Elerson; Dutra, Iveraldo S.	2023	PESQUISA VETERINARIA BRASILEIRA	0
Cross-sectional study	1	cross-sectional study	Factors related to utilization of dental services during pregnancy	10.1111/j.1600-051X.2005.00739.x	Al Habashneh, R; Guthmiller, JM; Levy, S; Johnson, GK; Squier, C; Dawson, DV; Fang, Q	2005	JOURNAL OF CLINICAL PERIODONTOLOGY	93		women who gave birth < 35 years old	625 women	knowledge, behaviors, attitudes toward dental care during pregnancy, and personal, demographic, and pregnancy-related factors using a structured questionnaire.The main dependent variable was the utilization of dental services during pregnancy, dichotomized as whether or not the women had a dental visit during pregnancy	Factors significantly associated with reporting dental visits during pregnancy included: personal factors (being married, greater frequency of visiting the dentist when not pregnant, and use of inter-proximal cleaning aids), financial factors (dental insurance), and knowledge of the possible connection between oral health and pregnancy outcomes.
	2	cross-sectional study	Pregnancy and oral health: utilisation of dental services during pregnancy in northern Greece	10.1080/00016340701371413	Dinas, Konstantinos; Achyropoulos, Vassilios; Hatzipantelis, Emmanouel; Mavromatidis, Georgios; Zepiridis, Leonidas; Theodoridis, Theodoros; Dovas, Dimitrios; Tantanasis, Theoharis; Goutzioulis, Fotios; Bontis, John	2007	ACTA OBSTETRICIA ET GYNECOLOGICA SCANDINAVICA	60		women who gave birth had an educational level of elementary or high school (91.3%), and belonged to the lower or middle economic class (98.6%)	425 women	symptoms of gingivitis, dental visits during pregnancy, and perceptions of the safety of dental treatment during pregnancy by anonymous questionnaire	Pregnancy gingivitis was independently associated with non-Greek ethnicity (p<0.008), multiparity (p<0.005), lower economic class (p<0.001), and lack of routine primary dental care (p<0.005) and dental treatment during pregnancy is safe were both independently associated with visiting a dentist during pregnancy (p<0.0005).
	3	cross-sectional study	Is there an association between periodontal disease, prematurity and low birth weight? A population-based study	10.1111/j.1600-051X.2005.00759.x	Lunardelli, AN; Peres, MA	2005	JOURNAL OF CLINICAL PERIODONTOLOGY	59		aged between 15 and 40 years old and having at least 18 natural teeth	376 women, which was increased to 447 to account for potential losses and refusals.	low birth weight, prematurity, and prematurity and/or low birth weight	no statistically significant association between periodontal disease and low birth weight. There was no association between periodontal pockets and low birth weight and/or pre-term birth even after adjusting for maternal education, parity, number of previous children with low birth weight, number of pre-natal consultations, and body mass index
	4	cross-sectional study	Salivary <i>Actinomyces naeslundii</i> genospecies 2 and <i>Lactobacillus casei</i> levels predict pregnancy outcomes	10.1902/jop.2005.76.2.171	Dasanayake, AP; Li, YH; Wiener, H; Ruby, JD; Lee, MJ	2005	JOURNAL OF PERIODONTOLOGY	55
	5	cross-sectional study	Self-reported oral hygiene habits, dental attendance and attitudes to dentistry during pregnancy in a sample of immigrant women in North London	10.1007/s00404-007-0480-8	Hullah, Esther; Turok, Yaroslava; Nauta, Maud; Yoong, Wai	2008	ARCHIVES OF GYNECOLOGY AND OBSTETRICS	53
	6	cross-sectional study	Correlation between infant birth weight and mother's periodontal status	10.1111/j.1600-051X.2005.00661.x	Marin, C; Segura-Egea, JJ; Martínez-Sahuquillo, A; Bullón, P	2005	JOURNAL OF CLINICAL PERIODONTOLOGY	53
	7	cross-sectional study	Evaluation of periodontal pathogens in amniotic fluid and the role of periodontal disease in pre-term birth and low birth weight	10.3109/00016357.2012.697576	Ercan, Esra; Eratalay, Kenan; Deren, Ozgur; Gur, Deniz; Ozyuncu, Ozgur; Altun, Belgin; Kanli, Ceyda; Ozdemir, Pinar; Akincibay, Hakan	2013	ACTA ODONTOLOGICA SCANDINAVICA	48
	8	cross-sectional study	Clinical and other risk indicators for early periodontitis in adults	10.1902/jop.2005.76.4.573	Tanner, ACR; Kent, R; Van Dyke, T; Sonis, ST; Murray, LA	2005	JOURNAL OF PERIODONTOLOGY	46
	9	cross-sectional study	Periodontitis and gestational diabetes mellitus: Exploring the link in NHANES III	10.1111/j.1752-7325.2006.tb02574.x	Novak, Karen F.; Taylor, George W.; Dawson, Dolphus R.; Ferguson, James E., II; Novak, M. John	2006	JOURNAL OF PUBLIC HEALTH DENTISTRY	42
	10	cross-sectional study	Periodontal health and adverse pregnancy outcome in 3,576 Turkish women	10.1902/jop.2007.070092	Toygar, H. Uslu; Seydaoglu, G.; Kurklu, S.; Guzeldemir, E.; Arpak, N.	2007	JOURNAL OF PERIODONTOLOGY	39
	11	cross-sectional study	Periodontal condition of pregnant women assessed by CPITN and the role of the nurses according to the needs of treatment		Tezel, Ayfer; Tezel, Adnan	2011	HEALTHMED	34
	12	cross-sectional study	The Association Between Periodontal Inflammation and Labor Triggers (Elevated Cytokine Levels) in Preterm Birth: A Cross-Sectional Study	10.1902/jop.2015.150364	Perunovic, Neda Dj.; Rakic, Mia M.; Nikolic, Ljubinka I.; Jankovic, Sasa M.; Aleksic, Zoran M.; Plecas, Darko V.; Madianos, Phoebus N.; Cakic, Sasa S.	2016	JOURNAL OF PERIODONTOLOGY	33
	13	cross-sectional study	Chronic periodontitis and pre-term labour in Brazilian pregnant women:: an association to be analysed	10.1111/j.1600-051X.2006.01038.x	Santos-Pereira, Silvio A.; Giraldo, Paulo C.; Saba-Chujfi, Eduardo; Amaral, Rose L. G.; Morais, Sirlei S.; Fachini, Ana Maria; Goncalves, Ana Katherine S.	2007	JOURNAL OF CLINICAL PERIODONTOLOGY	33
	14	cross-sectional study	Association between maternal dental periapical infections andpregnancy outcomes: results from a cross-sectional study in Malawi	10.1111/tmi.12579	Harjunmaa, Ulla; Jarnstedt, Jorma; Alho, Lotta; Dewey, Kathryn G.; Cheung, Yin Bun; Deitchler, Megan; Ashorn, Ulla; Maleta, Kenneth; Klein, Nigel J.; Ashorn, Per	2015	TROPICAL MEDICINE & INTERNATIONAL HEALTH	29
	15	cross-sectional study	Oral Inflammatory Burden and Preterm Birth	10.1902/jop.2009.080560	Heimonen, Aura; Janket, Sok-Ja; Kaaja, Risto; Ackerson, Leland K.; Muthukrishnan, Preetika; Meurman, Jukka H.	2009	JOURNAL OF PERIODONTOLOGY	27
	16	cross-sectional study	Postpartum oral health parameters in women with preterm birth	10.1080/00016350802307620	Heimonen, Aura; Rintamaeki, Hanna; Furuholm, Jussi; Janket, Sok-Ja; Kaaja, Risto; Meurman, Jukka H.	2008	ACTA ODONTOLOGICA SCANDINAVICA	26
	17	cross-sectional study	Preterm birth and/or low birth weight are associated with periodontal disease and the increased placental immunohistochemical expression of inflammatory markers	10.14670/HH-11-671	Pozo, Elena; Mesa, Francisco; Ikram, Mohamed H.; Puertas, Alberto; Torrecillas-Martinez, Laura; Ortega-Oller, Inmaculada; Magan-Fernandez, Antonio; Dolores Rodriguez-Martinez, Maria; Padial-Molina, Miguel; Sanchez-Fernandez, Elena; Galindo-Moreno, Pablo; O'Valle, Francisco	2016	HISTOLOGY AND HISTOPATHOLOGY	25
	18	cross-sectional study	The association between periodontal disease and adverse pregnancy outcomes in Northern Tanzania: a cross-sectional study	10.4314/ahs.v18i3.18	Gesase, Nyobasi; Miranda-Ruis, Jaume; Brunet-Llobet, Lluis; Lahor-Soler, Eduard; Mahande, Michael J.; Masenga, Gileard	2018	AFRICAN HEALTH SCIENCES	24
	19	cross-sectional study	Obstetric Knowledge, Attitude, and Behavior Concerning Periodontal Diseases and Treatment Needs in Pregnancy: Influencing Factors in France	10.1902/jop.2014.140371	Cohen, Laura; Schaeffer, Mickael; Davideau, Jean-Luc; Tenenbaum, Henri; Huck, Olivier	2015	JOURNAL OF PERIODONTOLOGY	22
	20	cross-sectional study	Periodontitis as a risk factor for preterm low birth weight	10.3349/ymj.2008.49.2.200	Marakoglu, Ismail; Gursoy, Ulvi Kahraman; Marakoglu, Kamile; Cakmak, Hulya; Ataoglu, Tamer	2008	YONSEI MEDICAL JOURNAL	22
	21	cross-sectional study	Association between periodontitis, periodontopathogens and preterm birth: is it real?	10.1007/s00404-015-3945-1	Elizabeth Martinez-Martinez, Rita; Francisca Moreno-Castillo, Diana; Pablo Loyola-Rodriguez, Juan; Gabriela Sanchez-Medrano, Ana; Hector San Miguel-Hernandez, Jesus; Honorio Olvera-Delgado, Jose; Abraham Dominguez-Perez, Ruben	2016	ARCHIVES OF GYNECOLOGY AND OBSTETRICS	18
	22	cross-sectional study	KAP Assessment of Oral Health and Adverse Pregnancy Outcomes Among Pregnant Women in Hyderabad, India	10.3290/j.ohpd.a30481	Avula, Haritha; Mishra, Ashank; Arora, Nupur; Avula, Jayakumar	2013	ORAL HEALTH & PREVENTIVE DENTISTRY	18
	23	cross-sectional study	Relationship between periodontal inflammation and fetal growth in pregnant women: a cross-sectional study	10.1007/s00404-012-2660-4	Takeuchi, Noriko; Ekuni, Daisuke; Irie, Koichiro; Furuta, Michiko; Tomofuji, Takaaki; Morita, Manabu; Watanabe, Tatsuo	2013	ARCHIVES OF GYNECOLOGY AND OBSTETRICS	17
	24	cross-sectional study	Obesity and Oral Health - Is There an Association?	PMID: 23213928	Prpic, Jelena; Kuis, Davor; Pezelj-Ribaric, Sonja	2012	COLLEGIUM ANTROPOLOGICUM	17
	25	cross-sectional study	Periodontal conditions, low birth weight and preterm birth among postpartum mothers in two tertiary health facilities in Uganda	10.1186/1472-6831-14-42	Muwazi, Louis; Rwenyonyi, Charles Mugisha; Nkamba, Moses; Kutesa, Annet; Kagawa, Mike; Mugyenyi, Godfrey; Kwizera, Godfrey; Okullo, Isaac	2014	BMC ORAL HEALTH	16
	26	cross-sectional study	Maternal periodontal status, oral inflammatory load, and systemic inflammation are associated with low infant birth weight	10.1002/JPER.20-0266	Mahapatra, Annuroopa; Nayak, Rashmita; Satpathy, Anurag; Pati, Basanta Kumar; Mohanty, Rinkee; Mohanty, Gatha; Beura, Rajdeep	2021	JOURNAL OF PERIODONTOLOGY	15
	27	cross-sectional study	Factors Associated with Preventive Dental Visits Before and During Pregnancy	10.1089/jwh.2018.7509	Naavaal, Shillpa; Brickhouse, Tegwyn H.; Hafidh, Shahid; Smith, Kenesha	2020	JOURNAL OF WOMENS HEALTH	15
	28	cross-sectional study	Association between periodontal disease and preterm prelabour rupture of membranes	10.1111/jcpe.13067	Radochova, Vladimira; Stepan, Martin; Musilova, Ivana Kacerovska; Slezak, Radovan; Vescicik, Peter; Menon, Ramkumar; Jacobsson, Bo; Kacerovsky, Marian	2019	JOURNAL OF CLINICAL PERIODONTOLOGY	12
	29	cross-sectional study	Very low and low birth weight associated with maternal periodontitis	10.1111/jcpe.12000	Guimaraes, Alessandra N.; Silva-Mato, Agustin; Siqueira, Fernanda M.; Cyrino, Renata M.; Cota, Luis O. M.; Costa, Fernando O.	2012	JOURNAL OF CLINICAL PERIODONTOLOGY	12
	30	cross-sectional study	Soft drink consumption and periodontal status in pregnant women	10.1002/JPER.16-0388	Menezes, Carla C.; Ribeiro, Cecilia C. C.; Alves, Claudia M. C.; Thomaz, Erika B. A. F.; Franco, Mayra M.; Batista, Rosfingela F. L.; Silva, Antonio A. M.	2019	JOURNAL OF PERIODONTOLOGY	11
	31	cross-sectional study	Oral Hygiene Practices and Awareness of Pregnant Women about the Effects of Periodontal Disease on Pregnancy Outcomes	10.1155/2022/5195278	Bushehab, Noora Mohammed Eissa; Sreedharan, Jayadevan; Reddy, Sesha; D'souza, Jovita; Abdelmagyd, Hossam	2022	INTERNATIONAL JOURNAL OF DENTISTRY	9
	32	cross-sectional study	Relationship among Hypovitaminosis D, Maternal Periodontal Disease, and Low Birth Weight	10.29271/jcpsp.2018.01.36	Khan, Farhan Raza; Ahmad, Tashfeen; Hussain, Rabia; Bhutta, Zulfiqar Ahmed	2018	JCPSP-JOURNAL OF THE COLLEGE OF PHYSICIANS AND SURGEONS PAKISTAN	9
	33	cross-sectional study	Periodontal Disease as a Potential Risk Factor for Low Birth Weight and Reduced Maternal Haemoglobin Levels	10.3290/j.ohpd.a31224	Kothiwale, Shaila V.; Desai, Babasaheb R.; Kothiwale, Veerappa A.; Gandhi, Megha; Konin, Savita	2014	ORAL HEALTH & PREVENTIVE DENTISTRY	9
	34	cross-sectional study	Periodontal disease and intra-amniotic complications in women with preterm prelabor rupture of membranes	10.1080/14767058.2017.1358265	Radochova, Vladimira; Kacerovska Musilova, Ivana; Stepan, Martin; Vescicik, Peter; Slezak, Radovan; Jacobsson, Bo; Kacerovsky, Marian	2018	JOURNAL OF MATERNAL-FETAL & NEONATAL MEDICINE	8
	35	cross-sectional study	Self-reported and clinical periodontal conditions in a group of Eastern European postpartum women	10.1371/journal.pone.0237510	Micu, Iulia C.; Bolboaca, Sorana D.; Caracostea, Gabriela, V; Gligor, Diana; Ciurea, Andreea; Iozon, Sofia; Soanca, Andrada; Muresan, Daniel; Roman, Alexandra	2020	PLOS ONE	7
	36	cross-sectional study	Relationship between preterm birth and post-partum periodontal maternal status: a hospital-based Romanian study	10.1007/s00404-020-05521-6	Micu, I. C.; Roman, A.; Ticala, F.; Soanca, A.; Ciurea, A.; Objelean, A.; Iancu, M.; Muresan, D.; Caracostea, G., V	2020	ARCHIVES OF GYNECOLOGY AND OBSTETRICS	7
	37	cross-sectional study	Association among gestational diabetes mellitus, periodontitis and prematurity: a cross-sectional study	10.20945/2359-3997000000435	Damante, Carla Andreotti; Foratori-Junior, Gerson Aparecido; Cunha, Paula de Oliveira; Negrato, Carlos Antonio; Carvalho Sales-Peres, Silvia Helena; Ragghianti Zangrando, Mariana Schutzer; Passanezi Sant'Ana, Adriana Campos	2022	ARCHIVES OF ENDOCRINOLOGY METABOLISM	6
	38	cross-sectional study	Influence of Periodontal Infection as a Possible Risk Factor for Preterm Low Birth Weight	10.4103/jpbs.JPBS_73_20	Thakur, Rajesh K.; Yadav, Bipin K.; Sultana, Rafat; Afridi, Shakeb K.; Das, Debasmita; Sahoo, Sheetal K.	2020	JOURNAL OF PHARMACY AND BIOALLIED SCIENCES	6
	39	cross-sectional study	Estimation of Transmission of Porphyromonas Gingivalis from Mother to Child through Saliva	10.31729/jnma.3475	Adhikari, Khushbu; Saimbi, Charanjeet Singh; Gupta, Birendra Prasad	2018	JOURNAL OF NEPAL MEDICAL ASSOCIATION	6
	40	cross-sectional study	A relationship between maternal periodontal disease and preterm low birth weight: A cross-sectional study	10.1016/j.cegh.2020.04.007	Vidhale, Priya; Puri, Sneha; Bhongade, M. L.	2020	CLINICAL EPIDEMIOLOGY AND GLOBAL HEALTH	5
	41	cross-sectional study	Knowledge and Practices of Oral Health Care During Pregnancy: A Survey Among Swiss Dentists	10.3290/j.ohpd.a44682	Razban, Maria; Giannopoulou, Catherine	2020	ORAL HEALTH & PREVENTIVE DENTISTRY	5
	42	cross-sectional study	Periodontal Health Status and Pregnancy Outcomes: A Survey in Medical Doctors	PMID: 30375998	Gupta, Sujaya; Shrestha, Barsha; Gupta, Neha; Tuladhar, Anik; Sushil, K. C.; Dhami, Bhageshwar	2018	JOURNAL OF NEPAL MEDICAL ASSOCIATION	5
	43	cross-sectional study	A Survey on Oral Health Knowledge, Attitudes and Practices of Pregnant Women Attending Four General Health Hospitals in Switzerland	10.3290/j.ohpd.b2573007	Lazaridi, Ioanna; Zekeridou, Alkisti; Schaub, Leandra; Prudente, Daniela; Razban, Maria; Giannopoulou, Catherine	2022	ORAL HEALTH & PREVENTIVE DENTISTRY	4
	44	cross-sectional study	A Survey on Oral Health Knowledge, Attitudes and Practices of Pregnant Women Attending Four General Health Hospitals in Switzerland	10.3290/j.ohpd.b2573007	Lazaridi, Ioanna; Zekeridou, Alkisti; Schaub, Leandra; Prudente, Daniela; Razban, Maria; Giannopoulou, Catherine	2022	ORAL HEALTH & PREVENTIVE DENTISTRY	4
	45	cross-sectional study	Association of periodontal disease with depression and adverse birth outcomes: Results from the Perinatal database; Finger Lakes region, New York State	10.1371/journal.pone.0215440	Kopycka-Kedzierawski, Dorota T.; Li, Dongmei; Xiao, Jin; Billings, Ronald J.; Dye, Timothy D.	2019	PLOS ONE	4
	46	cross-sectional study	Oral health care patterns and the history of miscarriage	10.1111/j.1601-0825.2008.01460.x	Heimonen, A.; Janket, S-J; Meurman, J. H.; Furuholm, J.; Ackerson, L. K.; Kaaja, R.	2008	ORAL DISEASES	4
	47	cross-sectional study	Association between birth-related factors and periodontitis in women: Korea National Health and Nutrition Examination Survey 2013-2018	10.1111/jcpe.13845	Kim, Na-Yeong; Kim, Ji-Eun; Choi, Choong-Ho; Chung, Ki-Ho	2023	JOURNAL OF CLINICAL PERIODONTOLOGY	3
	48	cross-sectional study	Quantile regression to estimate the survivor average causal effect (SACE) of periodontal treatment effects on birthweight and gestational age	10.1002/JPER.20-0376	Merchant, Anwar T.; Liu, Jihong; Reynolds, Mark A.; Beck, James D.; Zhang, Jiajia	2021	JOURNAL OF PERIODONTOLOGY	3
	49	cross-sectional study	Use of Dental Care Among Pregnant Women in the Brazilian Unified Health System	10.3290/j.ohpd.a41980	Ruiz, Luciana Fantinel; Uffermann, Gabriela; Vargas-Ferreira, Fabiana; Bavaresco, Caren Serra; Neves, Matheus; Reis de Moura, Flavio Renato	2019	ORAL HEALTH & PREVENTIVE DENTISTRY	3
	50	cross-sectional study	Knowledge, attitudes, and practices of healthcare professionals on oral care of pregnant women in Brunei Darussalam	10.1038/s41405-023-00162-8	Muhammad-Safwan, Nur-Afifah Syafiqah; Abdul-Mumin, Khadizah H. H.; Rahman, Hanif Abdul; Gharif, Rafidah; Haji-Momin, Haji-Mohin; Kisut, Ramlah; Zielinski, Ruth; Dhaliwal, Jagjit Singh	2023	BDJ OPEN	2
	51	cross-sectional study	Systemic Profile and Periodontal Condition of Hospitalized Women with High-Risk Pregnancy: A Cross-Sectional Study	10.1007/s10995-023-03659-8	Schievelbein, Bruna Silva; Casarin, Renata Picanco; Kruger, Marta Silveira da Mota; Fernandes e Silva, Caroline; da Silveira, Taciane Menezes; Romano, Ana Regina; Pappen, Fernanda Geraldo; Pola, Natalia Marcumini	2023	MATERNAL AND CHILD HEALTH JOURNAL	2
	52	cross-sectional study	Periodontal Inflamed Surface Area Is Associated With Increased Gestational Blood Pressure and Uric Acid Levels Among Pregnant Women From Rural North China	10.3389/fcvm.2022.830732	Hu, Shaonan; Yu, Feifan; Jiang, Hong; Shang, Wei; Miao, Hui; Li, Simin; Zhao, Jianjiang; Xiao, Hui	2022	FRONTIERS IN CARDIOVASCULAR MEDICINE	2
	53	cross-sectional study	Periodontal Diseases and Pregnancy: Knowledge and Clinical Practice Habits of French Midwives	10.3290/j.ohpd.b3680323	Novello, Solen; Pailleau, Marion; Le Devehat, Pierre; Jeanne, Sylvie	2022	ORAL HEALTH & PREVENTIVE DENTISTRY	2
	54	cross-sectional study	Maternal Periodontal Disease: A Possible Risk Factor for Adverse Pregnancy Outcomes in the Qassim Region of Saudi Arabia	10.4103/jpbs.JPBS_838_20	Alrumayh, Abdulwahab; Alfuhaid, Fahad; Sayed, Arshad Jamal; Tareen, Sabahat Ullah Khan; Alrumayh, Ibtehal; Habibullah, Mohammed Ali	2021	JOURNAL OF PHARMACY AND BIOALLIED SCIENCES	2
	55	cross-sectional study	Do the clinical criteria used to diagnose periodontitis affect the association with prematurity?	10.1007/s10266-020-00562-4	Moncunill-Mira, Jordi; Brunet-Llobet, Lluis; Cuadras, Daniel; Lorente-Colome, Nuria; Pascal, Rosalia; Rovira, Carlota; Nadal, Alfons; Miranda-Rius, Jaume	2021	ODONTOLOGY	2
	56	cross-sectional study	Evaluation of Gynecologists' Awareness About Oral Health Condition During Pregnancy in Chennai City	10.4103/jpbs.JPBS_24_19	Paneer, Silambarasan; Muthusamy, Narasimman; Manickavel, Rathinavel Pandian; Venkatakrishnan, Cakku Jalliah; Rathnavelu, Pradeep; Jayaram, Muthuvignesh	2019	JOURNAL OF PHARMACY AND BIOALLIED SCIENCES	2
	57	cross-sectional study	The relationship between oral health literacy and dental caries experienced among pregnant women in Arak, Iran, in 2021	10.34172/johoe.2023.21	Bashirian, Saeid; Barati, Maryam; Barati, Majid; Khazaei, Salman; Jenabi, Ensiyeh; Gholami, Leila; Shirahmadi, Samane	2023	JOURNAL OF ORAL HEALTH AND ORAL EPIDEMIOLOGY	1
	58	cross-sectional study	Periodontal disease in pregnancy: A comparative prospective study	10.1055/a-2008-1038	Ortmann, Nora; Moellers, Mareike; Braun, Janina; Sourouni, Marina; Willy, Daniela; Koester, Helen Ann; Klockenbusch, Walter; Schmitz, Ralf; Oelmeier, Kathrin	2023	ZEITSCHRIFT FUR GEBURTSHILFE UND NEONATOLOGIE	1
	59	cross-sectional study	Relationship between Oral Health Knowledge and Maternal Oral Health with Obstetric Risk and Breastfeeding	10.3390/ijerph19137797	Serrano-Sanchez, Silvia; Gonzalez-Gonzalez, Jaime; Rodriguez-Martin, Beatriz; Munoz-Rodriguez, Vanesa; de las Heras-Corrochano, Sonia; Jose Criado-Alvarez, Juan	2022	INTERNATIONAL JOURNAL OF ENVIRONMENTAL RESEARCH AND PUBLIC HEALTH	1
	60	cross-sectional study	Evaluation of the Knowledge Level, Behavior, and Attitudes of Obstetrics and Gynecology Specialists on the Relationship Between Periodontal Diseases and Pregnancy Outcomes	10.4274/meandros.galenos.2021.24381	Ustaoglu, Gulbahar; Ural, Ulku Mete; Paksoy, Tugce; Ankarali, Handan	2022	MEANDROS MEDICAL AND DENTAL JOURNAL	1
	61	cross-sectional study	Salivary and plasma inflammatory mediators and secretory status in preterm delivery women with periodontitis - a cross sectional study	10.2298/VSP171106066N	Nikolic, Ljubinka; Cakic, Sasa; Perunovic, Neda; Colak, Emina; Stevuljevic, Jelena-Kotur; Jankovic, Sasa; Djuric, Milanko; Plecas, Darko	2020	VOJNOSANITETSKI PREGLED	1
	62	cross-sectional study	Evaluating the knowledge, attitude, and behaviors of obstetricians and midwives regarding oral health in pregnant women	10.22122/johoe.v8i1.433	Rashidi-Maybodi, Fahimeh; Rahaei, Zohreh; Jalali-Pandary, Mehrdad; Faal-Rastegar, Nasrin	2019	JOURNAL OF ORAL HEALTH AND ORAL EPIDEMIOLOGY	1
	63	cross-sectional study	Dental health dispositions of pregnant women: A survey from a hospital clinic in Istanbul	10.1080/01443615.2017.1306837	Karasu, Ayse Filiz Gokmen; Kutuk, Nukhet; Aydin, Serdar; Adanir, Ilknur; Ates, Seda; Bademler, Neslihan	2017	JOURNAL OF OBSTETRICS AND GYNAECOLOGY	1
	64	cross-sectional study	Knowledge, attitude and practice towards periodontal diseases among gynaecologists: A pilot study	10.3109/01443615.2011.617850	Nagarakanti, S.	2012	JOURNAL OF OBSTETRICS AND GYNAECOLOGY	1
	65	cross-sectional study	Trends in maternal oral health services at primary healthcare centers in Saudi Arabia: a cross-sectional study	10.1186/s12903-023-03712-6	Al Agili, Dania	2023	BMC ORAL HEALTH	0
	66	cross-sectional study	The preconception health status of nongravid women aged 18 to 45 years in Arima, Trinidad: a cross-sectional study	10.1186/s12884-023-06017-2	Bala, Ria; Maharaj, Rohan G.; Boppana, Leela Krishna Teja; Teelucksingh, Surujpal	2023	BMC PREGNANCY AND CHILDBIRTH	0
	67	cross-sectional study	Awareness, knowledge and attitude toward the relationship between periodontal health and pregnancy outcomes among obstetrician-gynecologist healthcare professionals in Turkey: Results of 11<SUP>th</SUP> Turkish-German Gynecological Association Congress based survey	10.4274/jtgga.galenos.2022.2021-9-13	Turabi, Resul; Agrali, Omer Birkan; Dogan, Basak	2022	JOURNAL OF THE TURKISH-GERMAN GYNECOLOGICAL ASSOCIATION	0
	68	cross-sectional study	Knowledge and Perceptions of Dental Care During Pregnancy: A Cross-Sectional Survey of Adolescents and Young Adults	PMID: 37149874	Laxer, Kaitlin R.; Hammersmith, Kimberly J.; Amini, Homa; Casamassimo, Paul S.	2022	JOURNAL OF DENTISTRY FOR CHILDREN	0
	69	cross-sectional study	Initial Psychometric Testing of a Brief Maternal Oral Symptom Survey	10.1111/jmwh.13343	Park, Joy JooHee; Corwin, Elizabeth; Dunlop, Anne L.; Yang, Irene	2022	JOURNAL OF MIDWIFERY & WOMENS HEALTH	0
	70	cross-sectional study	AWARENESS ON ORAL HEALTH EFFECTS DURING PREGNANCY AMONG FEMALES'- A QUESTIONNAIRE BASED SURVEY		Baskar, Sharwini; Preetha, S.; Prathap, Lavanya; Jeevitha, M.	2022	INTERNATIONAL JOURNAL OF EARLY CHILDHOOD SPECIAL EDUCATION	0
	71	cross-sectional study	KNOWLEDGE AND AWARENESS ABOUT THE INFLUENCE OF PERIODONTITIS ON SYSTEMIC CONDITIONS AMONG MEDICAL PRACTITIONERS: A QUESTIONNAIRE STUDY	10.9756/INT-JECSE/V14I1.352	Vignesh, S.; Rajasekar, Arvina	2022	INTERNATIONAL JOURNAL OF EARLY CHILDHOOD SPECIAL EDUCATION	0
	72	cross-sectional study	Prevalence and Association of Preterm Birth and Low Birth Weight with Maternal Periodontitis and Gingivitis in Bahrain- A Cross-Sectional Study		Panjwani, Mehek; Bokade, Neeta; Alamanda, Madhavi; S. Hadi, Alaa; Alkhashram, Manar; Alwadaei, Manahel; Sarhan, Mai; Alwadaei, Manal	2021	BAHRAIN MEDICAL BULLETIN	0
	73	cross-sectional study	INVESTIGATING THE KNOWLEDGE, ATTITUDE, AND PRACTICE OF PREGNANT WOMEN ABOUT PERIODONTAL HEALTH AND ORAL HEALTH, AND THEIR EFFECT ON THE FETUS DURING PREGNANCY	10.52571/PTQ.v18.n38.2021.13_MOHAMADIMOGHADAM	Mohamadimoghadam, Marzieh; Shakib, Seyed Hojat; Salmani, Fatemeh	2021	PERIODICO TCHE QUIMICA	0
	74	cross-sectional study	Awareness on Oral Hygiene Measures Among Pregnant Women -A Cross Sectional Survey	10.21786/bbrc/13.7/75	Das, Anubhav; Sangeetha; Duraisamy, Revathi	2020	BIOSCIENCE BIOTECHNOLOGY RESEARCH COMMUNICATIONS	0
	75	cross-sectional study	Prenatal Counseling for Pregnant Women: A Survey of General Dentists	10.17796/jcpd.34.4.pl45w51412q200gu	Salama, Fouad; Kebriaei, Amy; McFarland, Kimberly; Durham, Timothy	2010	JOURNAL OF CLINICAL PEDIATRIC DENTISTRY	0
	76	cross-sectional study	Periodontal Diseases among Pregnant Women in Kuching, Sarawak	10.21315/aos2022.17S1.OA03	Ahmad, Aisah; Jaafar, Mohamad Adib	2022	ARCHIVES OF OROFACIAL SCIENCE	0
Prospective cohort study	1	prospective cohort study	Periodontal infection and preterm birth - Results of a prospective study	10.14219/jada.archive.2001.0299	Jeffcoat, MK; Geurs, NC; Reddy, MS; Cliver, SP; Goldenberg, RL; Hauth, JC	2001	JOURNAL OF THE AMERICAN DENTAL ASSOCIATION	338		periodontal, medical, and behavioral assessments between 21 and 24 weeks of gestation	1,313 pregnant women	the presence and severity of periodontal disease in relation to preterm birth, adjusted for smoking, parity, race, and maternal age.	an association between the presence of periodontitis at 21 to 24 weeks’ gestation and subsequent preterm birth.
	2	prospective cohort study	Progressive periodontal disease and risk of very preterm delivery	10.1097/01.AOG.0000190212.87012.96	Offenbacher, S; Boggess, KA; Murtha, AP; Jared, HL; Lieff, S; McKaig, RG; Mauriello, SM; Moss, KL; Beck, JD	2006	OBSTETRICS AND GYNECOLOGY	240		pregnant women who received both antepartum and postpartum periodontal examinations	1,020 pregnant women	the risk of preterm (less than 37 weeks) and very preterm (less than 32 weeks) births, as well as the risk of preterm birth associated with the severity and progression of periodontal disease	the progression of periodontal disease during pregnancy was associated with an increased risk of very preterm birth, independently of traditional obstetric, periodontal, and social domain risk factors
	3	prospective cohort study	A prospective study to investigate the relationship between periodontal disease and adverse pregnancy outcome	10.1038/sj.bdj.4811620	Moore, S; Ide, M; Coward, PY; Randhawa, M; Borkowska, E; Baylis, R; Wilson, RF	2004	BRITISH DENTAL JOURNAL	157		Participants completed questionnaires and underwent periodontal examinations	3,738 subjects	plaque and bleeding scores, probing pocket depth, and loss of attachment. Pregnancy outcome data collected included gestational age and birth weight at delivery	no significant relationships between the severity of periodontal disease and either preterm birth (PTB) or low birth weight (LBW). In contrast, there appeared to be a correlation between poorer periodontal health and those experiencing a late miscarriage
	4	prospective cohort study	Periodontal disease definition may determine the association between periodontitis and pregnancy outcomes	10.1111/j.1600-051X.2008.01222.x	Manau, Carolina; Echeverria, Ana; Agueda, Anna; Guerrero, Adrian; Echeverria, Jose J.	2008	JOURNAL OF CLINICAL PERIODONTOLOGY	119
	5	prospective cohort study	Maternal periodontitis and adverse pregnancy outcomes	10.1111/j.1600-0528.2006.00363.x	Pitiphat, Waranuch; Joshipura, Kaumudi J.; Gillman, Matthew W.; Williams, Paige L.; Douglass, Chester W.; Rich-Edwards, Janet W.	2008	COMMUNITY DENTISTRY AND ORAL EPIDEMIOLOGY	88
	6	prospective cohort study	Maternal periodontal disease in early pregnancy and risk for a small-for-gestational-age infant	10.1016/j.ajog.2005.11.059	Boggess, KA; Beck, JD; Murtha, AP; Moss, K; Offenbacher, S	2006	AMERICAN JOURNAL OF OBSTETRICS AND GYNECOLOGY	77
	7	prospective cohort study	Periodontal disease and adverse pregnancy outcomes: is there an association?	10.1016/j.ajog.2009.03.003	Srinivas, Sindhu K.; Sammel, Mary D.; Stamilio, David M.; Clothier, Bonnie; Jeffcoat, Marjorie K.; Parry, Samuel; Macones, George A.; Elovitz, Michal A.; Metlay, Joshua	2009	AMERICAN JOURNAL OF OBSTETRICS AND GYNECOLOGY	76
	8	prospective cohort study	Periodontal disease as a risk factor for adverse pregnancy outcomes:: a prospective cohort study	10.1111/j.1600-051X.2007.01166.x	Agueda, Anna; Ramon, Josep M.; Manau, Carolina; Guerrero, Adrian; Echeverria, Jose J.	2008	JOURNAL OF CLINICAL PERIODONTOLOGY	67
	9	prospective cohort study	Fetal immune response to oral pathogens and risk of preterm birth	10.1016/j.ajog.2005.05.050	Boggess, KA; Moss, K; Madianos, P; Murtha, AP; Beck, J; Offenbacher, S	2005	AMERICAN JOURNAL OF OBSTETRICS AND GYNECOLOGY	65
	10	prospective cohort study	Is maternal smoking during early pregnancy a risk factor for all low birth weight infants?	10.2188/jea.JE2007415	Suzuki, Kohta; Tanaka, Taichiro; Kondo, Naoki; Minai, Junko; Sato, Miri; Yamagata, Zentaro	2008	JOURNAL OF EPIDEMIOLOGY	59
	11	prospective cohort study	A protocol to identify non-classical risk factors for preterm births: the Brazilian Ribeirao Preto and Sao Luis prenatal cohort (BRISA)	10.1186/1742-4755-11-79	Moura da Silva, Antonio Augusto; Ferreira Simoes, Vanda Maria; Barbieri, Marco Antonio; Cardoso, Viviane Cunha; Coelho Alves, Claudia Maria; Abreu Fonseca Thomaz, Erika Barbara; de Sousa Queiroz, Rejane Christine; Cavalli, Ricardo Carvalho; Lucena Batista, Rosangela Fernandes; Bettiol, Heloisa	2014	REPRODUCTIVE HEALTH	55
	12	prospective cohort study	Periodontal disease and prematurity among non-smoking Sri Lankan women	10.1177/154405910508400313	Rajapakse, PS; Nagarathne, M; Chandrasekra, KB; Dasanayake, AP	2005	JOURNAL OF DENTAL RESEARCH	50
	13	prospective cohort study	The relationship between maternal periodontitis, adverse pregnancy outcome and miscarriage in never smokers	10.1111/j.1600-051X.2005.00884.x	Farrell, S; Ide, M; Wilson, RF	2006	JOURNAL OF CLINICAL PERIODONTOLOGY	49
	14	prospective cohort study	Relationship between maternal periodontal disease and low-birth-weight pre-term infants	10.1111/j.1600-051X.2005.00722.x	Moreu, G; Téllez, L; González-Jaranay, M	2005	JOURNAL OF CLINICAL PERIODONTOLOGY	48
	15	prospective cohort study	Association of maternal periodontal health with adverse pregnancy outcome	10.1111/j.1447-0756.2012.01957.x	Kumar, Ashok; Basra, Minu; Begum, Nargis; Rani, Vigya; Prasad, Sudha; Lamba, Arundeep Kaur; Verma, Mahesh; Agarwal, Sarita; Sharma, Shashi	2013	JOURNAL OF OBSTETRICS AND GYNAECOLOGY RESEARCH	42
	16	prospective cohort study	Periodontal Diseases, Preterm Births, and Low Birth Weight: Findings From a Homogeneous Cohort of Women hi Madagascar	10.1902/jop.2009.090351	Rakoto-Alson, Simone; Tenenbaum, Henri; Davideau, Jean-Luc	2010	JOURNAL OF PERIODONTOLOGY	36
	17	prospective cohort study	Periodontal disease and adverse birth outcomes: a study from Pakistan	10.1016/j.ajog.2008.03.010	Mobeen, N.; Jehan, I.; Banday, N.; Moore, J.; McClure, E. M.; Pasha, O.; Wright, L. L.; Goldenberg, R. L.	2008	AMERICAN JOURNAL OF OBSTETRICS AND GYNECOLOGY	34
	18	prospective cohort study	Periodontal Disease and Vitamin D Deficiency in Pregnant Women: Which Correlation with Preterm and Low-Weight Birth?	10.3390/jcm10194578	Ferrillo, Martina; Migliario, Mario; Roccuzzo, Andrea; Molinero-Mourelle, Pedro; Falcicchio, Giovanni; Umano, Giuseppina Rosaria; Pezzotti, Federica; Foglio Bonda, Pier Luigi; Calafiore, Dario; de Sire, Alessandro	2021	JOURNAL OF CLINICAL MEDICINE	32
	19	prospective cohort study	The evaluation of an oral health education program for midwives in Australia	10.1016/j.wombi.2015.10.004	George, Ajesh; Lang, Gillian; Johnson, Maree; Ridge, Allison; de Silva, Andrea M.; Ajwani, Shilpi; Bhole, Sameer; Blinkhorn, Anthony; Dahlen, Hannah G.; Ellis, Sharon; Yeo, Anthony; Langdon, Rachel; Carpenter, Lauren; Heilbrunn-Lang, Adina	2016	WOMEN AND BIRTH	31
	20	prospective cohort study	Periodontal disease and some adverse perinatal outcomes in a cohort of low risk pregnant women	10.1186/1742-4755-7-29	Vogt, Marianna; Sallum, Antonio W.; Cecatti, Jose G.; Morais, Sirlei S.	2010	REPRODUCTIVE HEALTH	30
	21	prospective cohort study	Pregnancy outcome after in utero exposure to local anesthetics as part of dental treatment A prospective comparative cohort study	10.1016/j.adaj.2015.04.002	Hagai, Aharon; Diav-Citrin, Orna; Shechtman, Svetlana; Ornoy, Asher	2015	JOURNAL OF THE AMERICAN DENTAL ASSOCIATION	29
	22	prospective cohort study	Systemic Immunologic Consequences of Chronic Periodontitis	10.1177/0022034519857714	Gaudilliere, D. K.; Culos, A.; Debali, K.; Tsai, A. S.; Ganio, E. A.; Choi, W. M.; Han, X.; Maghaireh, A.; Choisy, B.; Baca, Q.; Einhaus, J. F.; Hedou, J. J.; Bertrand, B.; Ando, K.; Fallahzadeh, R.; Ghaemi, M. S.; Okada, R.; Stanley, N.; Tanada, A.; Tingle, M.; Alpagot, T.; Helms, J. A.; Angst, M. S.; Aghaeepour, N.; Gaudilliere, B.	2019	JOURNAL OF DENTAL RESEARCH	28
	23	prospective cohort study	Unculturable and culturable periodontal-related bacteria are associated with periodontal inflammation during pregnancy and with preterm low birth weight delivery	10.1038/s41598-020-72807-9	Ye, Changchang; Xia, Zhongyi; Tang, Jing; Khemwong, Thatawee; Kapila, Yvonne; Kuraji, Ryutaro; Huang, Ping; Wu, Yafei; Kobayashi, Hiroaki	2020	SCIENTIFIC REPORTS	25
	24	prospective cohort study	Further evidence for periodontal disease as a risk indicator for adverse pregnancy outcomes	10.1111/idj.12274	Turton, Mervyn; Africa, Charlene W. J.	2017	INTERNATIONAL DENTAL JOURNAL	22
	25	prospective cohort study	Association between maternal periodontal disease and preterm delivery and low birth weight	10.1016/j.tjog.2013.01.011	Wang, Yen-Li; Liou, Jui-Der; Pan, Whei-Lin	2013	TAIWANESE JOURNAL OF OBSTETRICS & GYNECOLOGY	21
	26	prospective cohort study	Serum Placental Growth Factor, Vascular Endothelial Growth Factor, Soluble Vascular Endothelial Growth Factor Receptor-1 and -2 Levels in Periodontal Disease, and Adverse Pregnancy Outcomes	10.1902/jop.2011.100740	Sert, Tuba; Kirzioglu, F. Yesim; Fentoglu, Ozlem; Aylak, Firdevs; Mungan, Tamer	2011	JOURNAL OF PERIODONTOLOGY	21
	27	prospective cohort study	Systemic and periodontal conditions of overweight/obese patients during pregnancy and after delivery: a prospective cohort	10.1007/s00784-019-02932-x	Foratori-Junior, Gerson Aparecido; da Silva, Bruna Machado; da Silva Pinto, Ana Carolina; Honorio, Heitor Marque; Groppo, Francisco Carlos; de Carvalho Sales-Peres, Silvia Helena	2020	CLINICAL ORAL INVESTIGATIONS	20
	28	prospective cohort study	Association between maternal periodontitis and preterm and/or low birth weight infants in normal pregnancies	10.3109/14767058.2014.987751	Matilde Usin, Maria; Menso, Julieta; Ines Rodriguez, Veronica; Gonzalez, Analia; Tabares, Sandra; Parodi, Ricardo; Sembaj, Adela	2016	JOURNAL OF MATERNAL-FETAL & NEONATAL MEDICINE	19
	29	prospective cohort study	Maternal Periodontitis as a Possible Risk Factor for Preterm Birth and Low firth Weight - A Prospective Study	10.3290/j.ohpd.a34053	Basha, Sakeenabi; Swamy, Hiremath Shivaling; Mohamed, Roshan Noor	2015	ORAL HEALTH & PREVENTIVE DENTISTRY	19
	30	prospective cohort study	Association between periodontal disease and adverse pregnancy outcomes in a cohort of pregnant women in Jordan	PMID: 24283174	Alchalabi, H. A.; Al Habashneh, R.; Al Jabali, O.; Khader, Y. S.	2013	CLINICAL AND EXPERIMENTAL OBSTETRICS & GYNECOLOGY	18
	31	prospective cohort study	Fetal Exposure to Oral Pathogens and Subsequent Risk for Neonatal Intensive Care Admission	10.1902/jop.2009.080642	Jared, Heather; Boggess, Kim A.; Moss, Kevin; Bose, Carl; Auten, Richard; Beck, James; Offenbacher, Steven	2009	JOURNAL OF PERIODONTOLOGY	15
	32	prospective case cohort study	Preterm low birth weights associated with periodontal disease in the Fiji Islands	10.1111/j.1875-595x.2007.tb00129.x	Sharma, Ramakant; Maimanuku, Leenu R.; Morse, Zac; Pack, Angela R.	2007	INTERNATIONAL DENTAL JOURNAL	15
	33	prospective cohort study	Association between high risk for preterm birth and changes in gingiva parameters during pregnancy-a prospective cohort study	10.1007/s00784-017-2209-9	Kruse, Anne Brigitte; Kuerschner, Anja C.; Kunze, Mirjam; Woelber, Johan P.; Al-Ahmad, Ali; Wittmer, Annette; Vach, Kirstin; Ratka-Krueger, Petra	2018	CLINICAL ORAL INVESTIGATIONS	14
	34	prospective cohort study	Determinants of periodontal health in pregnant women and association with infants' anthropometric status: a prospective cohort study from Eastern Uganda	10.1186/1471-2393-12-90	Wandera, Margaret; Astrom, Anne N.; Okullo, Isaac; Tumwine, James K.	2012	BMC PREGNANCY AND CHILDBIRTH	14
	35	prospective cohort study	Relationship of Periodontal Disease to Pre-term Low Birth Weight Infants in a Selected Population - A Prospective Study.	PMID: 22482259	Ali, T. B. Taiyeb; Abidin, K. Zainal	2012	COMMUNITY DENTAL HEALTH	14
	36	prospective cohort study	Clinical study showing a lower abundance of <i>Neisseria</i> in the oral microbiome aligns with low birth weight pregnancy outcomes	10.1007/s00784-021-04214-x	Ye, Changchang; You, Meng; Huang, Ping; Xia, Zhongyi; Radaic, Allan; Tang, Jing; Wu, Wanhong; Wu, Yafei; Kapila, Yvonne	2022	CLINICAL ORAL INVESTIGATIONS	12
	37	prospective cohort study	Periodontal disease and preterm birth: Findings from the 2015 Pelotas birth cohort study	10.1111/odi.13670	de Oliveira, Luisa J. C.; Cademartori, Mariana G.; Schuch, Helena S.; Barros, Fernando C.; Silveira, Mariangela F.; Correa, Marcos B.; Demarco, Flavio F.	2021	ORAL DISEASES	12
	38	prospective cohort study	Role of cytokines in development of pre-eclampsia associated with periodontal disease - Cohort Study	10.1111/jcpe.12226	Kumar, Ashok; Begum, Nargis; Prasad, Sudha; Lamba, Arundeep K.; Verma, Mahesh; Agarwal, Sarita; Sharma, Shashi	2014	JOURNAL OF CLINICAL PERIODONTOLOGY	12
	39	prospective cohort study	Periodontitis as a Preterm Birth Risk Factor in Caucasian Women: A Cohort Study	10.3290/j.ohpd.a44116	Caneiro, Leticia; Manuel Lopez-Carral, Jose; Martin-Lancharro, Pablo; Linares, Antonio; Batalla, Pilar; Blanco-Carrion, Juan	2020	ORAL HEALTH & PREVENTIVE DENTISTRY	10
	40	prospective cohort study	Risk of preterm birth associated with maternal gingival inflammation and oral hygiene behaviours in rural Nepal: a community-based, prospective cohort study	10.1136/bmjopen-2019-036515	Erchick, Daniel J.; Khatry, Subarna K.; Agrawal, Nitin K.; Katz, Joanne; LeClerq, Steven C.; Rai, Bhola; Reynolds, Mark A.; Mullany, Luke C.	2020	BMJ OPEN	10
	41	prospective cohort study	Periodontal Disease Activity Measured by the Benzoyl-DL-Arginine-Naphthylamide Test Is Associated With Preterm Births	10.1902/jop.2010.090532	Chan, Hui-Chen; Wu, Chen-Tsai; Welch, Kathleen B.; Loesche, Walter J.	2010	JOURNAL OF PERIODONTOLOGY	10
	42	prospective cohort study	Synergistic effect of maternal obesity and periodontitis on preterm birth in women with pre-eclampsia: a prospective study	10.1111/jcpe.12574	Lee, Hyo-Jin; Ha, Jung-Eun; Bae, Kwang-Hak	2016	JOURNAL OF CLINICAL PERIODONTOLOGY	9
	43	prospective cohort study	Periodontal disease and preterm delivery: a nationwide population-based cohort study of Taiwan	10.1038/s41598-022-07425-8	Lee, Ya-Ling; Hu, Hsiao-Yun; Chou, Sin-Yi; Lin, Chen-Li; Cheng, Feng-Shiang; Yu, Chia-Yi; Chu, Dachen	2022	SCIENTIFIC REPORTS	8
	44	prospective cohort study	Correlation among periodontal health status, maternal age and pre-term low birth weight	PMID: 29178747	Capasso, Francesca; Vozza, Iole; Capuccio, Veronica; Vestri, Anna Rita; Polimeni, Antonella; Ottolenghi, Livia	2016	AMERICAN JOURNAL OF DENTISTRY	8
	45	prospective cohort study	Relationship between Periodontal Condition of the Pregnant Woman with Preterm Birth and Low Birth Weight	10.3390/jcm11226857	Gallagher-Cobos, Guillermo; Almerich-Torres, Teresa; Maria Montiel-Company, Jose; Enrique Iranzo-Cortes, Jose; Bellot-Arcis, Carlos; Carmelo Ortola-Siscar, Jose; Almerich-Silla, Jose Manuel	2022	JOURNAL OF CLINICAL MEDICINE	5
	46	prospective cohort study	Association between maternal periodontal status and ultrasonographic measurement of fetal growth: A longitudinal study	10.1038/s41598-020-58396-7	Taniguchi-Tabata, Ayano; Takeuchi, Noriko; Uchida, Yoko; Ekuni, Daisuke; Morita, Manabu	2020	SCIENTIFIC REPORTS	5
	47	prospective cohort study	Preconception Periodontitis and Risk of Spontaneous Abortion in a Prospective Cohort Study	10.1093/aje/kwad142	Bond, Julia C.; Wise, Lauren A.; Fox, Matthew P.; Garcia, Raul I.; Murray, Eleanor J.; White, Katharine O.; Rothman, Kenneth J.; Hatch, Elizabeth E.; Heaton, Brenda	2023	AMERICAN JOURNAL OF EPIDEMIOLOGY	4
	48	prospective cohort study	Microorganisms of maternal periodontitis cause adverse pregnancy outcomes in gestational diabetic individuals: a preliminary observational report	10.3290/j.qi.b3418267	Choudhury, Pallabi; Rao, Ravl. J.; Prabhu, Srikumar; Srirangarajan, Sridharan; Rudresh, Vinaya	2022	QUINTESSENCE INTERNATIONAL	3
	49	prospective cohort study	Maternal periodontal diseases affect the leukocyte profiles of umbilical cord blood: A cohort study	10.1111/odi.14683	Zhao, Dan; Cheng, Tianfan; Hu, Dangli; Xu, Xiaoyi; Zhang, Feng; Yu, Rong; Li, Huijun; Wen, Ping; Chen, Lihua; Fu, Mali; Yang, Hong; Zhang, Hanyu; Yao, Jilong; Jin, Lijian	2024	ORAL DISEASES	2
	50	prospective cohort study	A simple point of care test can indicate the need for periodontal therapy to reduce the risk for adverse pregnancy outcomes in mothers attending antenatal clinics	10.1080/1354750X.2017.1334151	Turton, Mervyn Sydney; Henkel, Ralf Reinhold; Africa, Charlene Wilma Joyce	2017	BIOMARKERS	2
	51	prospective cohort study	Association Between Periodontitis and Preterm Birth in a Cohort of Pregnant Women in Ivory Coast	10.3290/j.ohpd.b3464893	Pockpa, Zocko Ange Desire; Soueidan, Assem; Koffi-Coulibaly, Nadin Therese; Mobio, Gnaba Samson; Pere, Morgane; Badran, Zahi; Struillou, Xavier	2022	ORAL HEALTH & PREVENTIVE DENTISTRY	1
	52	prospective cohort study	Decreasing Tryptophan and Increasing Neopterin Plasma Levels During Pregnancy are Associated with High First Trimester <i>Porphyromonas gingivalis</i> K-Serotype IgG Serointensity in a Cohort of Hispanic Women	10.2174/1568026622666220404115543	Postolache, Teodor T. T.; Upadhyaya, Sanjaya K. K.; Spector, Anna M. M.; Mohyuddin, Iqra; Constantine, Niel; Ernst, Robert K. K.; Wadhawan, Abhishek; Dutra, Samia Valeria Ozorio; Dagdag, Aline; Makkar, Hina; Lowry, Christopher A. A.; Akram, Faisal; Fuchs, Dietmar; Brenner, Lisa A. A.; Groer, Maureen W. W.; Reynolds, Mark A. A.	2022	CURRENT TOPICS IN MEDICINAL CHEMISTRY	1
	53	prospective cohort study	Maternal Periodontal Status as a Factor Influencing Obstetrical Outcomes	10.3390/medicina59030621	Volgyesi, Petra; Radnai, Marta; Nemeth, Gabor; Boda, Krisztina; Bernad, Elena; Novak, Tibor	2023	MEDICINA-LITHUANIA	0
	54	prospective cohort study	Association between periodontitis and preterm low birth weight in human immunodeficiency virus seropositive pregnant women in India: A cohort study	10.4103/jfmpc.jfmpc_1203_22	Kiran, Sunkavilli Ravi; Karnam, Yudheera; Ramya, Yella; Niharika, Bammidi; Rani, Ponnaganti Durga; Sarma, Sankar Narayana	2022	JOURNAL OF FAMILY MEDICINE AND PRIMARY CARE	0
	55	prospective cohort study	The Role of Periodontal Disease in Preterm Labour - A Prospective Cohort Study (A Path Analysis) from Iran	10.14260/jemds/2021/262	Farshad, Mohammad Mahdi; Khorsand, Afshin; Kheirkhah, Masoomeh; Shamshiri, Ahmad Reza; Farshad, Fatemeh	2021	JOURNAL OF EVOLUTION OF MEDICAL AND DENTAL SCIENCES-JEMDS	0
Retrospective cohort study	1	Retrospective cohort study	An Examination of Periodontal Treatment, Dental Care, and Pregnancy Outcomes in an Insured Population in the United States	10.2105/AJPH.2009.185884	Albert, David A.; Begg, Melissa D.; Andrews, Howard F.; Williams, Sharifa Z.; Ward, Angela; Conicella, Mary Lee; Rauh, Virginia; Thomson, Janet L.; Papapanou, Panos N.	2011	AMERICAN JOURNAL OF PUBLIC HEALTH	21
	2	Retrospective cohort study	Periodontal disease: Repercussions in pregnant woman and newborn health-A cohort study	10.1371/journal.pone.0225036	Otsuka Padovan Figueiredo, Marina Guim; Takita, Stefanie Yaemi; Ramos Douradol, Bianca Maria; Mendes, Helderjan de Souza; Terakado, Erick Olsen; de Carvalho Nunes, Helio Rubens; Branco da Fonseca, Catia Regina	2019	PLOS ONE	16
	3	retrospective cohort study	Association between maternal periodontal disease and adverse pregnancy outcomes: an analysis of claims data	10.1093/fampra/cmab037	Choi, Sung Eun; Choudhary, Abhishek; Ahern, John M.; Palmer, Nathan; Barrow, Jane R.	2021	FAMILY PRACTICE	10
Case-control study	1	case-control study	Maternal periodontal disease and preterm low birthweight: Case-control study	10.1177/154405910208100505	Davenport, ES; Williams, CECS; Sterne, JAC; Murad, S; Sivapathasundram, V; Curtis, MA	2002	JOURNAL OF DENTAL RESEARCH	191		age group of 20-29 years old, with primary education level being secondary schoo	236 cases of preterm low birth weight (PLBW) infants and 507 controls	clinical periodontal indices such as pocket depth, level of inflammation, Community Periodontal Index of Treatment Need (CPITN), and attachment loss, as well as risk factors for periodontal disease and PLBW ascertained through structured questionnaires and maternity records	PLBW decreased with increasing pocket depth, and this trend remained after controlling for maternal age, ethnicity, education, smoking, alcohol consumption, infections during pregnancy, and hypertension. The results do not support an association between periodontal disease and PLBW.
	2	case-control study	Periodontal disease and upper genital tract inflammation in early spontaneous preterm birth	10.1097/01.AOG.0000139836.47777.6d	Goepfert, AR; Jeffcoat, MK; Andrews, WW; Faye-Petersen, O; Cliver, SP; Goldenberg, RL; Hauth, JC	2004	OBSTETRICS AND GYNECOLOGY	140		three groups: spontaneous preterm birth group (less than 32 weeks, n=59), indicated preterm birth group (less than 32 weeks, n=36), and term birth group (more than 37 weeks, n=44)	139 mother-infant pairs: 59 in the spontaneous preterm birth group, 36 in the indicated preterm birth group, and 44 in the term birth group	the severity of periodontal disease (defined by the degree of attachment loss), cultures of the placenta and umbilical cord blood, interleukin-6 levels in cord blood, and histopathologic examination of the placenta.	Multivariable analyses showed that severe periodontal disease was associated with spontaneous preterm birth (adjusted odds ratio 3.4, 95% confidence interval 1.5-7.7), but not significantly associated with selected markers of upper genital tract inflammation.
	3	case-control study	Periodontitis is associated with preeclampsia in pregnant women	10.1902/jop.2006.050020	Contreras, A.; Herrera, J. A.; Soto, J. E.; Arce, R. M.; Jaramillo, A.; Botero, J. E.	2006	JOURNAL OF PERIODONTOLOGY	119		women between 26 to 36 weeks of pregnancy with low socioeconomic status, with the majority having a secondary education level	373 pregnant women, with 130 in the preeclamptic group and 243 in the nonpreeclamptic group	sociodemographic data, obstetric risk factors, periodontal status, and subgingival microbial composition	Chronic periodontal disease and the presence of P. gingivalis, T. forsythensis, and E. corrodens were signifi-cantly associated with preeclampsia in pregnant women
	4	case-control study	Periodontitis, a marker of risk in pregnancy for preterm birth	10.1111/j.1600-051X.2004.00630.x	Dörtbudak, O; Eberhardt, R; Ulm, M; Persson, GR	2005	JOURNAL OF CLINICAL PERIODONTOLOGY	109
	5	case-control study	Markers of periodontal infection and preterm birth	10.1016/j.ajog.2004.07.018	Jarjoura, K; Devine, PC; Perez-Delboy, A; Herrera-Abreu, M; D'Alton, M; Papapanou, PN	2005	AMERICAN JOURNAL OF OBSTETRICS AND GYNECOLOGY	103
	6	case-control study	Periodontal infections and pre-term low birth weight:: a case-control study	10.1111/j.1600-051X.2005.00670.x	Buduneli, N; Baylas, H; Buduneli, E; Türkoglu, O; Köse, T; Dahlen, G	2005	JOURNAL OF CLINICAL PERIODONTOLOGY	100
	7	case-control study	A possible association between preterm birth and early periodontitis -: Pilot study	10.1111/j.1600-051X.2004.00564.x	Radnai, M; Gorzó, I; Nagy, E; Urbán, E; Novák, T; Pál, A	2004	JOURNAL OF CLINICAL PERIODONTOLOGY	79
	8	case-control study	Periodontal status and preterm low birth weight: a case control study	10.1111/j.1600-0765.2005.00808.x	Noack, B; Klingenberg, J; Weigelt, J; Hoffmann, T	2005	JOURNAL OF PERIODONTAL RESEARCH	77
	9	case-control study	Vitamin D Status and Periodontal Disease Among Pregnant Women	10.1902/JOP.2010.100384	Boggess, Kim A.; Espinola, Janice A.; Moss, Kevin; Beck, Jim; Offenbacher, Steven; Camargo, Carlos A., Jr.	2011	JOURNAL OF PERIODONTOLOGY	72
	10	case-control study	Maternal periodontitis and the causes of preterm birth: the case-control Epipap study	10.1111/j.1600-051X.2009.01503.x	Nabet, Cathy; Lelong, Nathalie; Colombier, Marie-Laure; Sixou, Michel; Musset, Anne-Marie; Goffinet, Francois; Kaminski, Monique	2010	JOURNAL OF CLINICAL PERIODONTOLOGY	70
	11	case-control study	Intrauterine growth restriction, low birth weight, and preterm birth: Adverse pregnancy outcomes and their association with maternal periodontitis	10.1902/jop.2007.070196	Siqueira, Fernanda Mafra; Miranda Cota, Luis Otavio; Costa, Jose Eustaquio; Amaral Haddad, Joao Paulo; Quintao Lana, Angela Maria; Costa, Fernando Oliveira	2007	JOURNAL OF PERIODONTOLOGY	67
	12	case-control study	Associations between systemic status, periodontal status, serum cytokine levels, and delivery outcomes in pregnant women with a diagnosis of threatened premature labor	10.1902/jop.2003.74.12.1764	Hasegawa, K; Furuichi, Y; Shimotsu, A; Nakamura, M; Yoshinaga, M; Kamitomo, M; Hatae, M; Maruyama, I; Izumi, Y	2003	JOURNAL OF PERIODONTOLOGY	66
	13	case-control study	A case-control study to investigate an association between adverse pregnancy outcome and periodontal disease	10.1111/j.1600-051X.2004.00598.x	Moore, S; Randhawa, M; Ide, M	2005	JOURNAL OF CLINICAL PERIODONTOLOGY	65
	14	case-control study	Periodontal disease and perinatal outcomes: a case-control study	10.1111/j.1600-051X.2006.01012.x	Bassani, D. G.; Olinto, M. T. A.; Kreiger, N.	2007	JOURNAL OF CLINICAL PERIODONTOLOGY	62
	15	case-control study	Possible association between mother's periodontal status and preterm delivery	10.1111/j.1600-051X.2006.00986.x	Radnai, Marta; Gorzo, Istvan; Urban, Edit; Eller, Jozsef; Novak, Tibor; Pal, Attila	2006	JOURNAL OF CLINICAL PERIODONTOLOGY	62
	16	case-control study	Molar-incisor hypomineralization and oral hygiene in 10-to-12-yr-old Swedish children born preterm	10.1111/j.1600-0722.2011.00792.x	Brogardh-Roth, Susanne; Matsson, Lars; Klingberg, Gunilla	2011	EUROPEAN JOURNAL OF ORAL SCIENCES	60
	17	case-control study	Maternal periodontal status and preterm low birth weight delivery: a case-control study	10.1007/s00404-008-0696-2	Khader, Yousef; Al-shishani, Lamis; Obeidat, Basil; Khassawneh, Mohammad; Burgan, Samar; Amarin, Zouhair O.; Alomari, Mousa; Alkafajei, Ahmad	2009	ARCHIVES OF GYNECOLOGY AND OBSTETRICS	59
	18	case-control study	Maternal inflammation in spontaneous term labor	10.1016/j.ajog.2011.01.002	Unal, Elizabeth Ramsey; Cierny, Jill T.; Roedner, Chantel; Newman, Roger; Goetzl, Laura	2011	AMERICAN JOURNAL OF OBSTETRICS AND GYNECOLOGY	57
	19	case-control study	Relationship between periodontal disease in pregnant women and the nutritional condition of their newborns	10.1902/jop.2002.73.10.1177	Romero, BC; Chiquito, CS; Elejalde, LE; Bernardoni, CB	2002	JOURNAL OF PERIODONTOLOGY	55
	20	case-control study	<i>Porphyromonas gingivalis</i> within Placental Villous Mesenchyme and Umbilical Cord Stroma Is Associated with Adverse Pregnancy Outcome	10.1371/journal.pone.0146157	Vanterpool, Sizzle F.; Been, Jasper V.; Houben, Michiel L.; Nikkels, Peter G. J.; De Krijger, Ronald R.; Zimmermann, Luc J. I.; Kramer, Boris W.; Progulske-Fox, Ann; Reyes, Leticia	2016	PLOS ONE	54
	21	case-control study	C-reactive protein as a systemic marker of inflammation in periodontitis	10.1007/s10096-010-1101-1	Pejcic, A.; Kesic, L. J.; Milasin, J.	2011	EUROPEAN JOURNAL OF CLINICAL MICROBIOLOGY & INFECTIOUS DISEASES	53
	22	case-control study	Association between maternal periodontitis and an increased risk of preeclampsia	10.1902/jop.2006.060061	Miranda Cota, Luis Otavio; Guimaraes, Alessandra Neves; Costa, Jose Eustaquio; Medeiros Lorentz, Telma Campos; Costa, Fernando Oliveira	2006	JOURNAL OF PERIODONTOLOGY	52
	23	case-control study	Anti-cardiolipin antibodies antibodies in sera from patients with periodontitis	10.1177/154405910308201114	Schenkein, HA; Berry, CR; Burmeister, JA; Brooks, CN; Barbour, SE; Best, AM; Tew, JG	2003	JOURNAL OF DENTAL RESEARCH	50
	24	case-control study	Association between periodontitis and low birth weight: a case-control study	10.1111/j.1600-051X.2005.00781.x	Moliterno, LFM; Monteiro, B; Figueredo, CMD; Fischer, RG	2005	JOURNAL OF CLINICAL PERIODONTOLOGY	49
	25	case-control study	Total Antioxidant Capacity and Superoxide Dismutase Activity Levels in Serum and Gingival Crevicular Fluid in Pregnant Women With Chronic Periodontitis	10.1902/jop.2009.080218	Akahn, Ferda Alev; Baltacioglu, Esra; Alver, Ahmet; Karabulut, Erdem	2009	JOURNAL OF PERIODONTOLOGY	47
	26	case-control study	Periodontal disease increases the risk of severe pre-eclampsia among pregnant women	10.1111/j.1600-051X.2007.01105.x	Canakci, Varol; Canakci, Cenk Fatih; Yildirim, Abdulkadir; Ingec, Metin; Eltas, Abubelkir; Erturk, Ayse	2007	JOURNAL OF CLINICAL PERIODONTOLOGY	44
	27	case-control study	Pre-term delivery and periodontal disease: a case-control study from Croatia	10.1111/j.1600-051X.2006.00977.x	Bosnjak, Andrija; Relja, Tomislav; Vucicevic-Boras, Vanja; Plasaj, Hrvoje; Plancak, Darije	2006	JOURNAL OF CLINICAL PERIODONTOLOGY	40
	28	case-control study	Maternal periodontitis as a potential risk variable for preeclampsia: A case-control study	10.1902/jop.2008.070174	Siqueira, Fernanda Mafra; Miranda Cota, Luis Otavio; Costa, Jose Eustaquio; Amaral Haddad, Joao Paulo; Quintao Lana, Angela Maria; Costa, Fernando Oliveira	2008	JOURNAL OF PERIODONTOLOGY	39
	29	case-control study	Women with a recent history of early-onset pre-eclampsia have a worse periodontal condition	10.1111/j.1600-051X.2006.01036.x	Kunnen, Alina; Blaauw, Judith; van Doormaal, Jasper J.; van Pampus, Maria G.; van der Schans, Cees P.; Aarnoudse, Jan G.; van Winkelhoff, Arie J.; Abbas, Frank	2007	JOURNAL OF CLINICAL PERIODONTOLOGY	39
	30	case-control study	<i>Porphyromonas gingivalis</i>, <i>Treponema denticola</i> and toll-like receptor 2 are associated with hypertensive disorders in placental tissue: a case-control study	10.1111/jre.12074	Chaparro, A.; Blanlot, C.; Ramirez, V.; Sanz, A.; Quintero, A.; Inostroza, C.; Bittner, M.; Navarro, M.; Illanes, S. E.	2013	JOURNAL OF PERIODONTAL RESEARCH	37
	31	case-control study	Is pre-term labour associated with periodontitis in a Danish maternity ward?	10.1111/j.1600-051X.2006.00899.x	Skuldbol, T; Johansen, KH; Dahlén, G; Stoltze, K; Holmstrup, P	2006	JOURNAL OF CLINICAL PERIODONTOLOGY	36
	32	case-control study	Oxidative stress markers in saliva and periodontal disease status: modulation during pregnancy and postpartum	10.1186/s12879-015-1003-z	Gumus, Pinar; Emingil, Gulnur; Ozturk, Veli-Ozgen; Belibasakis, Georgios N.; Bostanci, Nagihan	2015	BMC INFECTIOUS DISEASES	34
	33	case-control study	Association between periodontal status and pre-term and/or low-birth weight in Spain: clinical and microbiological parameters	10.1111/jre.12024	Santa Cruz, I.; Herrera, D.; Martin, C.; Herrero, A.; Sanz, M.	2013	JOURNAL OF PERIODONTAL RESEARCH	34
	34	case-control study	Lack of association between maternal periodontal status and adverse pregnancy outcomes: a multicentric epidemiologic study	10.3109/14767058.2012.733776	Abati, Silvio; Villa, Alessandro; Cetin, Irene; Dessole, Salvatore; Luglie, Pietrina Francesca; Strohmenger, Laura; Ottolenghi, Livia; Campus, Guglielmo G.	2013	JOURNAL OF MATERNAL-FETAL & NEONATAL MEDICINE	34
	35	case-control study	Maternal periodontal disease and perinatal mortality	10.1111/j.1479-828X.2009.00953.x	Shub, Alexis; Wong, Clement; Jennings, Belinda; Swain, Jonathan R.; Newnham, John P.	2009	AUSTRALIAN & NEW ZEALAND JOURNAL OF OBSTETRICS & GYNAECOLOGY	34
	36	case-control study	Anti-cardiolipin and increased serum adhesion molecule levels in patients with aggressive periodontitis	10.1902/jop.2007.060305	Schenkein, Harvey A.; Best, Al M.; Brooks, Carol N.; Burmeister, John A.; Arrowood, James A.; Kontos, Michael C.; Tew, John G.	2007	JOURNAL OF PERIODONTOLOGY	31
	37	case-control study	Is Maternal Periodontal Disease a Risk Factor for Preterm Delivery?	10.1093/aje/kwn399	Lohsoonthorn, Vitool; Kungsadalpipob, Kajorn; Chanchareonsook, Prohpring; Limpongsanurak, Sompop; Vanichjakvong, Ornanong; Sutdhibhisal, Sanutm; Wongkittikraiwan, Nopmanee; Sookprome, Chulamanee; Kamolpornwijit, Wiboon; Jantarasaengaram, Surasak; Manotaya, Saknan; Siwawej, Vatcharapong; Barlow, William E.; Fitzpatrick, Annette L.; Williams, Michelle A.	2009	AMERICAN JOURNAL OF EPIDEMIOLOGY	28
	38	case-control study	Lack of association between periodontal parameters and preeclampsia	10.1902/jop.2006.050463	Khader, Yousef S.; Jibreal, Muna; Al-Omiri, Mahmoud; Amarin, Zouhair	2006	JOURNAL OF PERIODONTOLOGY	28
	39	case-control study	Association Between Periodontitis and Gestational Diabetes Mellitus: A Case-Control Study	10.1902/jop.2012.120350	Esteves Lima, Rafael Paschoal; Miranda Cota, Luis Otavio; Costa, Fernando Oliveira	2013	JOURNAL OF PERIODONTOLOGY	27
	40	case-control study	Periodontitis as a Risk Factor for Preeclampsia	10.1902/jop.2012.110256	da Silva, Genivaldo Moura; Coutinho, Sonia B.; Piscoya, Maria Dilma B. V.; Ximenes, Ricardo A. A.; Jamelli, Silvia R.	2012	JOURNAL OF PERIODONTOLOGY	27
	41	case-control study	The periodontopathic bacteria in placenta, saliva and subgingival plaque of threatened preterm labor and preterm low birth weight cases: a longitudinal study in Japanese pregnant women	10.1007/s00784-020-03287-4	Ye, Changchang; Katagiri, Sayaka; Miyasaka, Naoyuki; Kobayashi, Hiroaki; Khemwong, Thatawee; Nagasawa, Toshiyuki; Izumi, Yuichi	2020	CLINICAL ORAL INVESTIGATIONS	26
	42	case-control study	Maternal periodontal status and preterm delivery: a hospital based case-control study	10.1111/j.1600-0765.2011.01371.x	Baskaradoss, J. K.; Geevarghese, A.; Kutty, V. R.	2011	JOURNAL OF PERIODONTAL RESEARCH	26
	43	case-control study	Cessation of periodontal care during pregnancy: effect on infant birthweight	10.1111/j.1600-0722.2006.00266.x	Hujoel, PP; Lydon-Rochelle, M; Robertson, PB; Del Aguila, MA	2006	EUROPEAN JOURNAL OF ORAL SCIENCES	26
	44	case-control study	Detection of Fusobacterium nucleatum in chorionic tissues of high-risk pregnant women	10.1111/j.1600-051X.2012.01855.x	Tateishi, Fumi; Hasegawa-Nakamura, Kozue; Nakamura, Toshiaki; Oogai, Yuichi; Komatsuzawa, Hitoshi; Kawamata, Kazuya; Douchi, Tsutomu; Hatae, Masayuki; Noguchi, Kazuyuki	2012	JOURNAL OF CLINICAL PERIODONTOLOGY	25
	45	case-control study	Maternal periodontitis as a risk factor for prematurity	10.1111/j.1442-200X.2011.03502.x	Piscoya, Maria Dilma B. V.; Ximenes, Ricardo A. A.; Silva, Genivaldo M.; Jamelli, Silvia R.; Coutinho, Sonia B.	2012	PEDIATRICS INTERNATIONAL	22
	46	case-control study	Periodontal disease and oral health-related behavior as factors associated with preterm birth: a case-control study in south-eastern Brazil	10.1111/jre.12124	Macedo, J. F.; Ribeiro, R. A.; Machado, F. C.; Assis, N. M. S. P.; Alves, R. T.; Oliveira, A. S.; Ribeiro, L. C.	2014	JOURNAL OF PERIODONTAL RESEARCH	21
	47	case-control study	Relationship between maternal periodontal disease and low birth weight babies	PMID: 24639799	Haerian-Ardakani, Ahmad; Eslami, Zia; Rashidi-Meibodi, Fahimeh; Haerian, Alireza; Dallalnejad, Pantea; Shekari, Marjan; Taghavi, Amir Moein; Akbari, Solmaz	2013	IRANIAN JOURNAL OF REPRODUCTIVE MEDICINE	21
	48	case-control study	Apical Periodontitis, a Predictor Variable for Preeclampsia: A Case-control Study	10.1016/j.joen.2017.05.021	Khalighinejad, Navid; Aminoshariae, Anita; Kulild, James C.; Mickel, Andre	2017	JOURNAL OF ENDODONTICS	19
	49	case-control study	Increased periodontal inflammation in women with preterm premature rupture of membranes	10.1007/s00784-014-1371-6	Stadelmann, Pascale F. M.; Eick, Sigrun; Salvi, Giovanni E.; Surbek, Daniel; Mohr, Stefan; Buergin, Walter; Ramseier, Christoph A.; Sculean, Anton	2015	CLINICAL ORAL INVESTIGATIONS	19
	50	case-control study	Are Periodontal Bacterial Profiles and Placental Inflammatory Infiltrate in Pregnancy Related to Birth Outcomes?	10.1902/jop.2012.120462	Mesa, Francisco; Pozo, Elena; Blanc, Vanessa; Puertas, Alberto; Bravo, Manuel; O'Valle, Francisco	2013	JOURNAL OF PERIODONTOLOGY	18
	51	case-control study	Distribution of anaerobic bacteria among pregnant periodontitis patients who experience preterm delivery	10.1016/j.anaerobe.2005.08.001	Urbán, E; Radnai, M; Novák, T; Gorzó, I; Pál, A; Nagy, E	2006	ANAEROBE	18
	52	case-control study	Assessing the association between periodontitis and premature birth: a case-control study	10.1186/s12884-021-03700-0	Uwambaye, Peace; Munyanshongore, Cyprien; Rulisa, Stephen; Shiau, Harlan; Nuhu, Assuman; Kerr, Michael S.	2021	BMC PREGNANCY AND CHILDBIRTH	17
	53	case-control study	Association between periodontitis and spontaneous abortion: A case-control study	10.1002/JPER.18-0174	Chanomethaporn, Anchana; Chayasadom, Anek; Wara-Aswapati, Nawarat; Kongwattanakul, Kiattisak; Suwannarong, Waraporn; Tangwanichgapong, Kamonchanok; Sumanonta, Gunniga; Matangkasombut, Oranart; Dasanayake, Ananda P.; Pitiphat, Waranuch	2019	JOURNAL OF PERIODONTOLOGY	17
	54	case-control study	Maternal dental caries and pre-term birth: Results from the EPIPAP study	10.3109/00016357.2011.563242	Vergnes, Jean-Noel; Kaminski, Monique; Lelong, Nathalie; Musset, Anne-Marie; Sixou, Michel; Nabet, Cathy	2011	ACTA ODONTOLOGICA SCANDINAVICA	17
	55	case-control study	Maternal Periodontal Disease and Risk of Preeclampsia: A Case-Control Study	10.1038/ajh.2008.365	Lohsoonthorn, Vitool; Kungsadalpipob, Kajorn; Chanchareonsook, Prohpring; Limpongsanurak, Sompop; Vanichjakvong, Ornanong; Sutdhibhisal, Sanutm; Sookprome, Chulamanee; Wongkittikraiwan, Nopmanee; Kamolpornwijit, Wiboon; Jantarasaengaram, Surasak; Manotaya, Saknan; Siwawej, Vatcharapong; Barlow, Willam E.; Fitzpatrick, Annette L.; Williams, Michelle A.	2009	AMERICAN JOURNAL OF HYPERTENSION	17
	56	case-control study	Association between Chronic Apical Periodontitis and Low-birth-weight Preterm Births	10.1016/j.joen.2014.11.018	Mendonca Leal, Alex Sandro; Figueiredo de Oliveira, Ana Emilia; Oliveira Brito, Luciane Maria; Lopes, Fernanda Ferreira; Rodrigues, Vandilson Pinheiro; Lima, Karinna Froes; de Araujo Martins, Illana Catharine	2015	JOURNAL OF ENDODONTICS	16
	57	case-control study	Systemic Inflammation in Pregnant Women With Periodontitis and Preterm Prelabor Rupture of Membranes: A Prospective Case-Control Study	10.3389/fimmu.2019.02624	Mohr, Stefan; Amylidi-Mohr, Sofia K.; Stadelmann, Pascale; Sculean, Anton; Persson, Rutger; Eick, Sigrun; Surbek, Daniel V.	2019	FRONTIERS IN IMMUNOLOGY	15
	58	case-control study	Characterizing the Subgingival Microbiome of Pregnant African American Women	10.1016/j.jogn.2018.12.003	Yang, Irene; Knight, Anna K.; Dunlop, Anne L.; Corwin, Elizabeth J.	2019	JOGNN-JOURNAL OF OBSTETRIC GYNECOLOGIC AND NEONATAL NURSING	15
	59	case-control study	Relationship Among Mothers' Glycemic Level, Periodontitis, and Birth Weight	10.1902/jop.2015.150423	Gomes-Filho, Isaac S.; Pereira, Eliesita C.; Cruz, Simone S.; Adan, Luis Fernando F.; Vianna, Maria Isabel P.; Passos-Soares, Johelle S.; Trindade, Soraya C.; Oliveira, Ernesto P.; Oliveira, Michelle T.; Cerqueira, Eneida de M. M.; Pereira, Antonio Luis; Barreto, Mauricio L.; Seymour, Gregory John	2016	JOURNAL OF PERIODONTOLOGY	15
	60	case-control study	Health Behaviors, Periodontal Conditions, and Periodontal Pathogens in Spontaneous Preterm Birth: A Case-Control Study in Korea	10.1902/jop.2010.090667	Ryu, Jae-In; Oh, KyungJoon; Yang, HyeJin; Choi, Bong-Kyu; Ha, Jung-Eun; Jin, Bo-Hyoung; Kim, Hyun-Duck; Bae, Kwang-Hak	2010	JOURNAL OF PERIODONTOLOGY	15
	61	case-control study	Relationship between periodontal parameters and plasma cytokine profiles in pregnant woman with preterm birth or low birth weight	10.1007/s00784-015-1553-x	Mesa, Francisco; Pozo, Elena; O'Valle, Francisco; Puertas, Alberto; Magan-Fernandez, Antonio; Rosel, Eva; Bravo, Manuel	2016	CLINICAL ORAL INVESTIGATIONS	14
	62	case-control study	Periodontitis among poor rural Indian mothers increases the risk of low birth weight babies: a hospital-based case control study	10.5051/jpis.2014.44.2.85	Jacob, Pulikottil Shaju; Nath, Sonia	2014	JOURNAL OF PERIODONTAL AND IMPLANT SCIENCE	14
	63	case-control study	Effect of maternal periodontitis and low birth weight-A case control study	10.3109/00016357.2015.1049374	Souza, Luise Maria; da Cruz, Simone Seixas; Gomes-Filho, Isaac Suzart; Barreto, Mauricio Lima; Passos-Soares, Johelle Santana; Trindade, Soraya Castro; Morais Godoy Figueiredo, Ana Claudia; Coelho Alves, Claudia Maria; Freitas Coelho, Julita Maria; Pereira Vianna, Maria Isabel	2016	ACTA ODONTOLOGICA SCANDINAVICA	13
	64	case-control study	Periodontal disease and nitric oxide levels in low risk women with preterm labor	10.1016/j.ejogrb.2011.04.034	Giannella, Luca; Giulini, Simone; Cerami, Lillo Bruno; La Marca, Antonio; Forabosco, Andrea; Volpe, Annibale	2011	EUROPEAN JOURNAL OF OBSTETRICS & GYNECOLOGY AND REPRODUCTIVE BIOLOGY	13
	65	case-control study	Epidemiology of preterm birth in Omdurman maternity hospital, Sudan	10.3109/14767050903067345	Alhaj, Amel M.; Radi, Elgoni A.; Adam, Ishag	2010	JOURNAL OF MATERNAL-FETAL & NEONATAL MEDICINE	13
	66	case-control study	A pilot study of the association between cariogenic oral bacteria and preterm birth*	10.1111/j.1601-0825.2009.01559.x	Durand, R.; Gunselman, E. L.; Hodges, J. S.; DiAngelis, A. J.; Michalowicz, B. S.	2009	ORAL DISEASES	13
	67	case-control study	No association between periodontitis and preterm low birth weight: a case-control study	10.1007/s00404-017-4556-9	Fogacci, Mariana Fampa; Cardoso, Elaine de O. C.; Barbirato, Davi da S.; de Carvalho, Denise Pires; Sansone, Carmelo	2018	ARCHIVES OF GYNECOLOGY AND OBSTETRICS	12
	68	case-control study	Periodontal Disease and Pregnancy Hypertension: A Clinical Correlation	10.1902/jop.2012.120264	Pralhad, Swati; Thomas, Betsy; Kushtagi, Pralhad	2013	JOURNAL OF PERIODONTOLOGY	12
	69	case-control study	Interleukin-1 receptor antagonist gene polymorphism, adverse pregnancy outcome and periodontitis in Turkish women	10.1016/j.archoralbio.2015.09.013	Kayar, Nezahat Arzu; Alptekin, Nilgun Ozlem; Erdal, Mehmet Emin	2015	ARCHIVES OF ORAL BIOLOGY	11
	70	case-control study	RETRACTED: Can <i>Porphyromonas</i> <i>gingivalis</i> be a novel aetiology for recurrent miscarriage? (Retracted Article)	10.3109/13625187.2014.962651	Ibrahim, Moustafa I.; Abdelhafeez, Mohamed A.; Ellaithy, Mohamed I.; Salama, Ahmed H.; Amin, Adel S.; Eldakrory, Hesham; Elhadad, Nagwa I.	2015	EUROPEAN JOURNAL OF CONTRACEPTION AND REPRODUCTIVE HEALTH CARE	11
	71	case-control study	Assessing the Association between Oral Hygiene and Preterm Birth by Quantitative Light-Induced Fluorescence	10.1155/2014/374694	Hope, Christopher K.; Wang, Qian; Burnside, Girvan; Adeyemi, Adejumoke A.; Quenby, Siobhan; Smith, Philip W.; Higham, Susan M.; Whitworth, Melissa	2014	SCIENTIFIC WORLD JOURNAL	11
	72	case-control study	Periodontal condition is associated with adverse perinatal outcomes and premature rupture of membranes in low-income pregnant women in Bogota, Colombia: a case?control study	10.1080/14767058.2018.1484092	Ines Lafaurie, Gloria; Amparo Gomez, Luz; Antonio Montenegro, Daniel; De Avila, Juliette; Cecilia Tamayo, Martha; Cristina Lancheros, Maria; Quiceno, Johanna; Goretty Trujillo, Tamy; Antonio Noriega, Luis; Lucia Grueso, Maria; Cepeda, Kelly	2020	JOURNAL OF MATERNAL-FETAL & NEONATAL MEDICINE	10
	73	case-control study	Maternal periodontal disease and adverse perinatal outcomes: is there an association? A hospital-based case-control study	10.1080/14767058.2018.1464554	da Mota Kruger, Marta Silveira; Casarin, Renata Picanco; Pinto, Gabriela dos Santos; Pappen, Fernanda Geraldo; Junqueira Camargo, Maria Beatriz; Bello Correa, Fernanda Oliveira; Romano, Ana Regina	2019	JOURNAL OF MATERNAL-FETAL & NEONATAL MEDICINE	10
	74	case-control study	Preterm birth associated with periodontal and dental indicators: a pilot case-control study in a developing country	10.1080/14767058.2019.1613363	De Lourdes Marquez-Corona, Maria; Tellez-Giron-Valdez, Aldo; Patricia Pontigo-Loyola, America; Islas-Zarazua, Rosalina; Leticia Robles-Bermeo, Norma; Silvia Gonzalez-Lopez, Blanca; Eduardo Medina-Solis, Carlo	2021	JOURNAL OF MATERNAL-FETAL & NEONATAL MEDICINE	10
	75	case-control study	Periodontal status as predictor of prematurity and low birth weight	10.1111/j.1752-7325.2006.tb04088.x	Gomes-Filho, Isaac S.; da Cruz, Simone S.; Rezende, Edson J. C.; da Silveira, Bruno B. de B.; Trindade, Soraya C.; Passos, Johelle S.; de Freitas, Camila O. T.; Cerqueira, Eneida M. M.; de Souza Teles Santos, Carlos Antonio	2006	JOURNAL OF PUBLIC HEALTH DENTISTRY	10
	76	case-control study	Gestational diabetes mellitus increases the detection rate and the number of oral bacteria in pregnant women	10.1097/MD.0000000000014903	Yao, Han; Xu, Dan; Zhu, Zhichao; Wang, Guoyun	2019	MEDICINE	9
	77	case-control study	Association between early preterm birth and periodontitis according to USA and European consensus definitions	10.3109/14767058.2012.663827	de Tejada, B. Martinez; Gayet-Ageron, A.; Combescure, C.; Irion, O.; Baehni, P.	2012	JOURNAL OF MATERNAL-FETAL & NEONATAL MEDICINE	9
	78	case-control study	Periodontopathogenic microbiota, infectious mechanisms and preterm birth: analysis with structural equations (cohort-BRISA)	10.1007/s00404-019-05355-x	Costa, Elisa Miranda; de Araujo Figueiredo, Camilla Silva; Marao Martins, Rafiza Felix; Costa Ribeiro, Cecilia Claudia; Coelho Alves, Claudia Maria; Talarico Sesso, Maria Lucia; Nogueira, Ruchele Dias; Saraiva, Maria da Conceicao; Barbieri, Marco Antonio; Bettiol, Heloisa; Moura da Silva, Antonio Augusto; Abreu Fonseca Thomaz, Erika Barbara	2019	ARCHIVES OF GYNECOLOGY AND OBSTETRICS	8
	79	case-control study	Association between preterm and low-birth weight with periodontal disease: a case-control study	PMID: 25246927	Khadem, Nayyereh; Rahmani, Mohammad Ebrahim; Sanaei, Alireza; Afiat, Mliheh	2012	IRANIAN JOURNAL OF REPRODUCTIVE MEDICINE	8
	80	case-control study	Effect of Oral Diseases on Mothers Giving Birth to Preterm Infants	10.1159/000329887	Ryalat, Soukaina; Sawair, Faleh; Baqain, Zaid; Barghout, Nicola; Amin, Wala; Badran, Darwish; Badran, Eman	2011	MEDICAL PRINCIPLES AND PRACTICE	8
	81	case-control study	Diversity of the gut, vaginal and oral microbiome among pregnant women in South Africa with and without pre-eclampsia	10.3389/fgwh.2022.810673	Geldenhuys, Janri; Redelinghuys, Mathys J.; Lombaard, Hendrik A.; Ehlers, Marthie M.; Cowan, Don; Kock, Marleen M.	2022	FRONTIERS IN GLOBAL WOMENS HEALTH	7
	82	case-control study	Comparisons of Periodontal Status between Females Referenced for Fertility Treatment and Fertile Counterparts: A Pilot Case-Control Study	10.3390/ijerph17155281	Machado, Vanessa; Botelho, Joao; Proenca, Luis; Mendes, Jose Joao	2020	INTERNATIONAL JOURNAL OF ENVIRONMENTAL RESEARCH AND PUBLIC HEALTH	7
	83	case-control study	Quantitative analysis of key periodontopathic bacteria in gestational diabetic and non-diabetic women	10.1007/s40200-019-00420-3	Ganiger, Kavitha; Sridharan, Srirangarajan; Rahul, Aparna; Satyanarayana, Aparna	2019	JOURNAL OF DIABETES AND METABOLIC DISORDERS	7
	84	case-control study	Effect of Periodontal Disease on Preeclampsia	PMID: 23113094	Sayar, F.; Hoseini, M. Sadat; Abbaspour, S.	2011	IRANIAN JOURNAL OF PUBLIC HEALTH	7
	85	case-control study	Could Poor Periodontal Status be a Warning Sign for Worse Pregnancy Outcome?	10.3290/j.ohpd.a43356	Novak, Tibor; Nemeth, Gabor; Kozinszky, Zoltan; Urban, Edit; Gorzo, Istvan; Radnai, Marta	2020	ORAL HEALTH & PREVENTIVE DENTISTRY	6
	86	case-control study	Is there a relationship between maternal periodontitis and pre-term birth? A prospective hospital-based case-control study	10.3109/00016357.2014.919663	Bulut, Gulcin; Olukman, Ozgur; Calkavur, Sebnem	2014	ACTA ODONTOLOGICA SCANDINAVICA	6
	87	case-control study	Oral health status of women with high-risk pregnancies	10.5507/bp.2012.045	Merglova, Vlasta; Hecova, Hana; Stehlikova, Jaroslava; Chaloupka, Pavel	2012	BIOMEDICAL PAPERS-OLOMOUC	6
	88	case-control study	Oral microbiome and preterm birth	10.3389/fmed.2023.1177990	Simic, Marijana Vidmar; Maver, Ales; Zimani, Ana Nyasha; Hocevar, Keli; Peterlin, Borut; Kovanda, Anja; Premru-Srsen, Tanja	2023	FRONTIERS IN MEDICINE	4
	89	case-control study	Association between preterm birth and low birth weight and maternal chronic periodontitis: A hospital-based case-control study	10.17219/dmp/152234	Bhavsar, Neeta Vijay; Trivedi, Sakshee; Vachhani, Kirti Suresh; Brahmbhatt, Nilam; Shah, Shraddha; Patel, Neesha; Gupta, Divya; Periasamy, Ramya	2023	DENTAL AND MEDICAL PROBLEMS	4
	90	case-control study	Influence of maternal periodontal health as a risk factor for low-birth-weight infants in Terai population of Nepal	10.4103/jehp.jehp_408_18	Wazir, Sartaj Singh; Arora, Pallak; Ghosh, Snehashish; Bhagat, Vasuda; Khurana, Suchi; Mahanta, Swagat	2019	JOURNAL OF EDUCATION AND HEALTH PROMOTION	4
	91	case-control study	Oral, systemic and socioeconomic factors associated with preterm birth	10.1016/j.wombi.2018.02.007	Vieira, Anna Clara F.; Alves, Claudia M. C.; Rodrigues, Vandilson P.; Ribeiro, Cecilia C. C.; Gomes-Filho, Isaac S.; Lopes, Fernanda F.	2019	WOMEN AND BIRTH	4
	92	case-control study	C-Reactive Protein Levels and Periodontal Diseases During Pregnancy in Malaysian Women	10.3290/j.ohpd.a40759	Ahmad, Aisah; Nazar, Zeyad; Swaminathan, Dasan	2018	ORAL HEALTH & PREVENTIVE DENTISTRY	4
	93	case-control study	Relationship between maternal periodontal disease and Apgar score of newborns	10.5051/jpis.2012.42.6.212	Shirmohammadi, Adileh; Abdollahifard, Sedigeh; Chitsazi, Mohammad-Taghi; Behlooli, Sepideh	2012	JOURNAL OF PERIODONTAL AND IMPLANT SCIENCE	4
	94	case-control study	Mothers' high glycemic levels and the association between periodontitis and low birth weight	10.1002/JPER.21-0406	Gomes-Filho, Isaac Suzart; Trindade, Soraya Castro; da Cruz, Simone Seixas; Morais Godoy Figueiredo, Ana Claudia; Hintz, Alexandre Marcelo; Fernandes Adan, Luis Fernando; Marcilio Cerqueira, Eneida de Moraes; Passos-Soares, Johelle de Santana; Pereira Vianna, Maria Isabel; Freitas Coelho, Julita Maria; Coelho Alves, Claudia Maria; Barreto, Mauricio Lima; Seymour, Gregory John; Loomer, Peter Micha…	2022	JOURNAL OF PERIODONTOLOGY	3
	95	case-control study	Impact of Scaling and Periodontal Treatment during Pregnancy on the Risk of Adverse Birth Outcomes	10.3390/jpm12020137	Chen, Jhih-Jhen; Wu, Dai-Rong; Lin, Wei-Szu; Chen, I-Chieh; Liu, Jeng-Fen; Chen, Hui-Ling; Lin, Ching-Heng	2022	JOURNAL OF PERSONALIZED MEDICINE	3
	96	case-control study	Red-Complex Bacterial Levels in Pregnant Women With Preeclampsia and Chronic Periodontitis	10.1016/j.identj.2022.10.003	Mahendra, Jaideep; Mahendra, Little; Sharma, Vivek; Alamoudi, Ahmed; Bahammam, Hammam Ahmed; Mugri, Maryam H.; Bahammam, Sarah Ahmed; Bahammam, Maha A.; Zidane, Bassam; Nayaki, Rao P. Abirami; Muralidharan, Janani; Dave, Pavithra H.; Balaji, Thodur Madapusi; Bhandi, Shilpa; Patil, Shankargouda	2023	INTERNATIONAL DENTAL JOURNAL	2
	97	case-control study	Interleukin 1 beta and its association with the periodontal health of pregnant women	10.1016/j.jtumed.2023.05.012	El Hassan, Nawal K. B.; Ramadan, AbdelRahman M.	2023	JOURNAL OF TAIBAH UNIVERSITY MEDICAL SCIENCES	1
	98	case-control study	The Association of Periodontal Disease with Low Birth Weight Infants: A Case Control Study	10.1007/s10995-023-03620-9	Hussain, Varda; Waseem, Anoosha; Husain, Irtaza; Waseem, Uzma; Shahbaz, Maliha; Qureshi, Fauzia	2023	MATERNAL AND CHILD HEALTH JOURNAL	1
	99	case-control study	Gain a Baby Lose a Tooth-Is There an Association between Periodontitis and Preterm Birth?	10.3390/jcm11237183	Bartha, Valentin; Steinmacher, Sahra; Wittlinger, Rebekka; Boutin, Sebastien; Pauluschke-Froehlich, Jan; von Ohle, Christiane; Brucker, Sara Yvonne; Bruckner, Thomas; Wolff, Diana	2022	JOURNAL OF CLINICAL MEDICINE	1
	100	case-control study	Relationship Between the Periodontal Status of Pregnant Women and the Incidence and Severity of Pre-term and/or Low Birth Weight Deliveries: A Retrospective Observational Case-Control Study	10.7759/cureus.31735	Sinha, Abhishek; Singh, Neha; Gupta, Anamika; Bhargava, Triveni; Mahesh, P. C.; Kumar, Pratiksha	2022	CUREUS JOURNAL OF MEDICAL SCIENCE	1
	101	case-control study	IL-17, A Possible Salivary Biomarker for Preterm Birth in Females with Periodontitis	10.1007/s13224-021-01466-1	Mahilkar, Sonal; Malagi, Sachin K.; Soni, Abhishek; Abraham, Dennis V.; Johnson, Lynn; Pattanshetti, Kirti S.	2021	JOURNAL OF OBSTETRICS AND GYNECOLOGY OF INDIA	1
	102	case-control study	Periodontal Disease in Pregnant Patients with Rheumatic Valvular Disease - Clinical and Microbiological Study	10.1590/S0066-782X2011005000034	Avila, Walkiria Samuel; Timerman, Lilia; Romito, Giuseppe Alexandre; Marcelino, Silvia Linard; Lucia, Itamara; Neves, Itagiba; Zugaib, Marcelo; Grinberg, Max	2011	ARQUIVOS BRASILEIROS DE CARDIOLOGIA	1
	103	case-control study	Predicting preterm birth using machine learning techniques in oral microbiome	10.1038/s41598-023-48466-x	Hong, You Mi; Lee, Jaewoong; Cho, Dong Hyu; Jeon, Jung Hun; Kang, Jihoon; Kim, Min-Gul; Lee, Semin; Kim, Jin Kyu	2023	SCIENTIFIC REPORTS	0
	104	case-control study	The Relationship between Periodontal Disease, Preterm Delivery, and Low Birth Weight of Infants: A Case-Control Study	10.22038/ijp.023.69847.5150	Akbari, Narjes; Keyvanfar, Sanaz; Hajipour, Elahe; Ghanbarzadeh, Nahid; Salehiniya, Hamid	2023	INTERNATIONAL JOURNAL OF PEDIATRICS-MASHHAD	0
	105	case-control study	A Nested Case-Control Study of the Relationship between Salivary Inflammatory Mediators, Periodontal Parameters, and Preterm Birth in a Chinese Population	10.1155/2022/8629680	Wu, Min; Ye, Chanjuan; Li, Huijun; Yang, Xiuqiao; Zhu, Sujun; Zhou, Fangming; Hao, Ying; Chen, Shaowu; Jiang, Shaoyun	2022	BIOMED RESEARCH INTERNATIONAL	0
	106	case-control study	Oil-based vitamin E oral spray for oral health in pregnancy	10.2144/fsoa-2021-0095	Reppuccia, Sabrina; Crocetto, Felice; Gragnano, Elisabetta; D'Alessandro, Pietro; Vetrella, Martin; Saccone, Gabriele; Arduino, Bruno	2022	FUTURE SCIENCE OA	0
	107	case-control study	Microbiological findings of the maternal periodontitis associated to low birthweight	10.31744/einstein_journal/2020AO4209	de Oliveira, Mariana Cedraz; Gomes-Filho, Isaac Suzart; Stocker, Andreas; Barreto Neto, Laerte Oliveira; Santos, Andre do Nascimento; da Cruz, Simone Seixas; Passos-Soares, Johelle Santana; Lopes Falcao, Michelle Miranda; Cardoso Meireles, Jose Roberto; Seymour, Gregory John; Meyer, Roberto; Trindade, Soraya Castro	2020	EINSTEIN-SAO PAULO	0
	108	case-control study	Endotoxemia among Postpartum Mothers with Periodontitis Delivering Low Birth Weight Babies: A Case Control Study in Rural Indian Population	10.7860/JCDR/2020/42851.13419	Nath, Sonia; Prakash, Jayant; Prajapati, Virendra Kumar; Pulikkotil, Shaju Jacob	2020	JOURNAL OF CLINICAL AND DIAGNOSTIC RESEARCH	0
	109	case-control study	Association between Porphyromonas gingivalis bacteria in infra-gingival plaque and premature labor with low birth weight	10.4103/jnms.jnms_93_21	Maboudi, Avideh; Ahmadi, Arezoo; Heidari, Mohadese; Rafiei, Alireza; Rahmani, Zahra; Moosazadeh, Mahmood; Valadan, Reza; Kardan, Mostafa; Shiva, Atena	2022	JOURNAL OF NURSING AND MIDWIFERY SCIENCES	0
Prevalence study	1	systematic review	Epidemiology of association between maternal periodontal disease and adverse pregnancy outcomes systematic review	10.1111/jcpe.12063	Ide, Mark; Papapanou, Panos N.	2013	JOURNAL OF CLINICAL PERIODONTOLOGY	243
	2	review	Life-course epidemiology: concepts and theoretical models and its relevance to chronic oral conditions	10.1111/j.1600-0528.2007.00332.x	Nicolau, B.; Thomson, W. M.; Steele, J. G.; Allison, P. J.	2007	COMMUNITY DENTISTRY AND ORAL EPIDEMIOLOGY	113
	3	prevalence study	Self-reported periodontal disease: Validation in an epidemiological survey	10.1902/jop.2007.060481	Taylor, George W.; Borgnakke, Wenche S.	2007	JOURNAL OF PERIODONTOLOGY	57
	4	prevalence study	A community-based epidemiological study of periodontal disease in Keelung, Taiwan: a model from Keelung community-based integrated screening programme (KCIS No. 18)	10.1111/j.1600-051X.2007.01121.x	Lai, Hongmin; Lo, Min-Te; Wang, Po-En; Wang, Ting-Ting; Chen, Tony Hsiu-Hsi; Wu, Grace Hui-Min	2007	JOURNAL OF CLINICAL PERIODONTOLOGY	38
	5	review	Periodontology and pregnancy: An overview of biomedical and epidemiological evidence	10.1111/prd.12394	Raju, Karen; Berens, Lisa	2021	PERIODONTOLOGY 2000	36
	6	Cross Sectional Survey	Periodontal condition of pregnant women assessed by CPITN and the role of the nurses according to the needs of treatment		Tezel, Ayfer; Tezel, Adnan	2011	HEALTHMED	34
	7	prevalence study	Prevalence and risk factors of periodontal disease among pre-conception Chinese women	10.1186/s12978-016-0256-3	Jiang, Hong; Su, Yi; Xiong, Xu; Harville, Emily; Wu, Hongqiao; Jiang, Zhijun; Qian, Xu	2016	REPRODUCTIVE HEALTH	22
	8	systematic review	Prevalence of periodontal disease in pregnancy: A systematic review and meta-analysis	10.1016/j.jdent.2022.104253	Chen, Piaopiao; Hong, Feiruo; Yu, Xuefen	2022	JOURNAL OF DENTISTRY	21
	9	RCT	Lessons learned from the Philadelphia Collaborative Preterm Prevention Project: the prevalence of risk factors and program participation rates among women in the intervention group	10.1186/s12884-014-0368-0	Webb, David A.; Mathew, Leny; Culhane, Jennifer F.	2014	BMC PREGNANCY AND CHILDBIRTH	16
	10	case control study	Epidemiology of preterm birth in Omdurman maternity hospital, Sudan	10.3109/14767050903067345	Alhaj, Amel M.; Radi, Elgoni A.; Adam, Ishag	2010	JOURNAL OF MATERNAL-FETAL & NEONATAL MEDICINE	13
	11	Comparative Study	Periodontal disease as one possible explantion for the Mexican paradox	10.1016/j.mehy.2006.05.059	Xiong, X.; Buekens, P.; Vastardis, S.; Wu, T.	2006	MEDICAL HYPOTHESES	11
	12		Prevalence and correlates of periodontitis among Kenyan women planning to conceive	10.1186/s12903-022-02243-w	Oyaro, Brenda; Lokken, Erica; Alumera, Hudson; Hussein, Shahid; Richardson, Barbra; Mandaliya, Kishorchandra; Jaoko, Walter; Kinuthia, John; Dimba, Elizabeth; Kemoli, Arthur; McClelland, R. Scott	2022	BMC ORAL HEALTH	3
	13	Cross-Sectional Study	Prevalence and Risk Factors for Periodontal Disease Among Women Attending Antenatal Care in Public Hospitals, Southwest Ethiopia, 2022: A Multicenter Cross-Sectional Study	10.2147/CCIDE.S367713	Belay, Alemayehu Sayih; Achimano, Atsede Atirsaw	2022	CLINICAL COSMETIC AND INVESTIGATIONAL DENTISTRY	3
	14		Predictors and prevalence of periodontitis among pregnant women of slum areas of Patna, India: An opportunity for oral health promotion	10.4103/jehp.jehp_934_20	Singh, Supriya; Nazeer, Jazib; Singh, Revati; Kavita, Kumari; Iqubal, Md Asad; Singh, Rohit	2021	JOURNAL OF EDUCATION AND HEALTH PROMOTION	2
	15	Cross-Sectional Study	y Population-Based Estimation of Dental Caries and Periodontal Disease Rates of Gravid and Recently Postpartum Women in Lilongwe, Malawi	10.1055/s-0039-1695003	Antony, Kathleen M.; Kazembe, Peter N.; Pace, Ryan M.; Levison, Judy; Mlotha-Namarika, Jesse; Phiri, Henry; Chiudzu, Grace; Harris, R. Alan; Aagaard, Joshua; Twyman, Nicholas; Ramin, Susan M.; Raine, Susan P.; Belfort, Michael A.; Aagaard, Kjersti M.	2019	AJP REPORTS	2
	16	Cross-Sectional Study	Prevalence and Association of Preterm Birth and Low Birth Weight with Maternal Periodontitis and Gingivitis in Bahrain- A Cross-Sectional Study		Panjwani, Mehek; Bokade, Neeta; Alamanda, Madhavi; S. Hadi, Alaa; Alkhashram, Manar; Alwadaei, Manahel; Sarhan, Mai; Alwadaei, Manal	2021	BAHRAIN MEDICAL BULLETIN	0
	17	Cross Sectional Survey	Periodontal Diseases among Pregnant Women in Kuching, Sarawak	10.21315/aos2022.17S1.OA03	Ahmad, Aisah; Jaafar, Mohamad Adib	2022	ARCHIVES OF OROFACIAL SCIENCE	0
RCT (intervention study)	1	RCT	Treatment of periodontal disease and the risk of preterm birth	10.1056/NEJMoa062249	Michalowicz, Bryan S.; Hodges, James S.; DiAngelis, Anthony J.; Lupo, Virginia R.; Novak, M. John; Ferguson, James E.; Buchanan, William; Bofill, James; Papapanou, Panos N.; Mitchell, Dennis A.; Matseoane, Stephen; Tschida, Pat A.	2006	NEW ENGLAND JOURNAL OF MEDICINE	360		pregnant women who were at least 16 years old and less than 16 weeks and 6 days of gestation	823 patients were randomly assigned to two groups, with 413 in the treatment group and 410 in the control group	The primary prespecified outcome was the gestational age at the end of pregnancy. Secondary outcomes included birth weight, the proportion of infants who were small for gestational age, Apgar scores, and admissions to a neonatal intensive care unit	Periodontal treatment improved clinical measures of periodontal disease but did not significantly alter the rates of preterm birth, low birth weight, or fetal growth restriction.
	2	RCT	Periodontal therapy may reduce the risk of preterm low birth weight in women with periodontal disease:: A randomized controlled trial	10.1902/jop.2002.73.8.911	López, NJ; Smith, PC; Gutierrez, J	2002	JOURNAL OF PERIODONTOLOGY	350		pregnant women aged 18 to 35 diagnosed with periodontal disease, receiving prenatal care	400 women, randomly assigned to an experimental group (200) and a control group (200)	The primary outcomes assessed were delivery before 37 weeks of gestation or an infant weighing less than 2,500 g	Periodontal disease was the strongest factor related to preterm low birth weight. The study concluded that periodontal therapy significantly reduced the rates of preterm low birth weight in women with periodontal disease
	3	RCT	Periodontal disease and preterm birth: Results of a pilot intervention study	10.1902/jop.2003.74.8.1214	Jeffcoat, MK; Hauth, JC; Geurs, NC; Reddy, MS; Cliver, SP; Hodgkins, PM; Goldenberg, RL	2003	JOURNAL OF PERIODONTOLOGY	256		pregnant women with periodontitis between 21 and 25 weeks' gestation.	366 women, divided into three treatment groups: 1) dental prophylaxis plus placebo; 2) scaling and root planing (SRP) plus placebo; 3) SRP plus metronidazole	preterm birth rates at less than 37 weeks and less than 35 weeks' gestation.	performing SRP in pregnant women with periodontitis may reduce preterm birth in this population, and adjunctive metronidazole therapy did not improve pregnancy outcomes
	4	RCT	Periodontal therapy reduces the rate of preterm low birth weight in women with pregnancy-associated gingivitis	10.1902/jop.2005.76.11-S.2144	López, NJ; Da Silva, I; Ipinza, J; Gutiérrez, J	2005	JOURNAL OF PERIODONTOLOGY	178
	5	RCT	Effects of Periodontal Therapy on Rate of Preterm Delivery <i>A Randomized Controlled Trial</i>	10.1097/AOG.0b013e3181b1341f	Offenbacher, Steven; Beck, James D.; Jared, Heather L.; Mauriello, Sally M.; Mendoza, Luisto C.; Couper, David J.; Stewart, Dawn D.; Murtha, Amy P.; Cochran, David L.; Dudley, Donald J.; Reddy, Michael S.; Geurs, Nicolaas C.; Hauth, John C.	2009	OBSTETRICS AND GYNECOLOGY	172
	6	RCT	Effects of periodontal therapy during pregnancy on periodontal status, biologic parameters, and pregnancy outcomes: A pilot study	10.1902/jop.2006.060047	Offenbacher, Steven; Lin, Dongming; Strauss, Robert; McKaig, Rosemary; Irving, Joanna; Barros, Silvana P.; Moss, Kevin; Barrow, David A.; Hefti, A.; Beck, James D.	2006	JOURNAL OF PERIODONTOLOGY	156
	7	RCT	Treatment of Periodontal Disease During Pregnancy <i>A Randomized Controlled Trial</i>	10.1097/AOG.0b013e3181c15b40	Newnham, John P.; Newnham, Ian A.; Ball, Colleen M.; Wright, Michelle; Pennell, Craig E.; Swain, Jonathan; Doherty, Dorota A.	2009	OBSTETRICS AND GYNECOLOGY	128
	8	RCT	Obstetric outcomes after treatment of periodontal disease during pregnancy: systematic review and meta-analysis	10.1136/bmj.c7017	Polyzos, Nikolaos P.; Polyzos, Ilias P.; Zavos, Apostolos; Valachis, Antonis; Mauri, Davide; Papanikolaou, Evangelos G.; Tzioras, Spyridon; Weber, Daniel; Messinis, Ioannis E.	2010	BMJ-BRITISH MEDICAL JOURNAL	118
	9	RCT	Treatment of localized periodontal disease in pregnancy does not reduce the occurrence of preterm birth: results from the Periodontal Infections and Prematurity Study (PIPS)	10.1016/j.ajog.2009.10.892	Macones, George A.; Parry, Samuel; Nelson, Deborah B.; Strauss, Jerome F.; Ludmir, Jack; Cohen, Arnold W.; Stamilio, David M.; Appleby, Dina; Clothier, Bonnie; Sammel, Mary D.; Jeffcoat, Marjorie	2010	AMERICAN JOURNAL OF OBSTETRICS AND GYNECOLOGY	99
	10	RCT	Examining the safety of dental treatment in pregnant women	10.14219/jada.archive.2008.0250	Michalowicz, Bryan S.; DiAngelis, Anthony J.; Novak, M. John; Buchanan, William; Papapanou, Panos N.; Mitchell, Dennis A.; Curran, Alice E.; Lupo, Virginia R.; Ferguson, James E.; Bofill, James; Matseoane, Stephen; Deinard, Amos S., Jr.; Rogers, Tyson B.	2008	JOURNAL OF THE AMERICAN DENTAL ASSOCIATION	87
	11	RCT	Effect of periodontal therapy on pregnancy outcome on women affected by periodontitis	10.1902/jop.2007.060388	Tarannum, Fouzia; Faizuddin, Mohamed	2007	JOURNAL OF PERIODONTOLOGY	86
	12	RCT	Periodontal infection and preterm birth: successful periodontal therapy reduces the risk of preterm birth	10.1111/j.1471-0528.2010.02713.x	Jeffcoat, M.; Parry, S.; Sammel, M.; Clothier, B.; Catlin, A.; Macones, G.	2011	BJOG-AN INTERNATIONAL JOURNAL OF OBSTETRICS AND GYNAECOLOGY	79
	13	RCT	Benefits of Periodontal Therapy When Preterm Birth Threatens	10.1177/0022034508330229	Radnai, M.; Pal, A.; Novak, T.; Urban, E.; Eller, J.; Gorzo, I.	2009	JOURNAL OF DENTAL RESEARCH	63
	14	RCT	Periodontal Bacterial Profiles in Pregnant Women: Response to Treatment and Associations With Birth Outcomes in the Obstetrics and Periodontal Therapy (OPT) Study	10.1902/jop.2008.070554	Novak, M. John; Novak, Karen F.; Hodges, James S.; Kirakodu, Sreenatha; Govindaswami, Meera; DiAngelis, Anthony; Buchanan, William; Papapanou, Panos N.; Michalowicz, Bryan S.	2008	JOURNAL OF PERIODONTOLOGY	61
	15	RCT	Periodontal therapy and risk for adverse pregnancy outcomes	10.1007/s00784-010-0424-8	Soares Dutra Oliveira, Alcione Maria; Dutra de Oliveira, Peterson Antonio; Miranda Cota, Luis Otavio; Magalhaes, Claudia Silami; Moreira, Allyson Nogueira; Costa, Fernando Oliveira	2011	CLINICAL ORAL INVESTIGATIONS	41
	16	RCT	Serum Inflammatory Mediators in Pregnancy: Changes After Periodontal Treatment and Association With Pregnancy Outcomes	10.1902/jop.2009.090236	Michalowicz, Bryan S.; Novak, M. John; Hodges, James S.; DiAngelis, Anthony; Buchanan, William; Papapanou, Panos N.; Mitchell, Dennis A.; Ferguson, James E., II; Lupo, Virginia; Bofill, James; Matseoane, Stephen; Steffen, Michelle; Ebersole, Jeffrey L.	2009	JOURNAL OF PERIODONTOLOGY	39
	17	RCT	Evaluation of the incidence of preterm low birth weight in patients undergoing periodontal therapy	10.1902/jop.2007.060295	Gazolla, Catia M.; Ribeiro, Adair; Moyses, Marcos R.; Oliveira, Luiz A. M.; Pereira, Luciano J.; Sallum, Antonio W.	2007	JOURNAL OF PERIODONTOLOGY	36
	18	RCT	The midwifery initiated oral health-dental service protocol: an intervention to improve oral health outcomes for pregnant women	10.1186/1472-6831-15-2	Johnson, Maree; George, Ajesh; Dahlen, Hannah; Ajwani, Shilpi; Bhole, Sameer; Blinkhorn, Anthony; Ellis, Sharon; Yeo, Anthony	2015	BMC ORAL HEALTH	34
	19	RCT	Changes in inflammatory mediators in gingival crevicular fluid following periodontal disease treatment in pregnancy: relationship to adverse pregnancy outcome	10.1016/j.jri.2015.05.002	Penova-Veselinovic, Blagica; Keelan, Jeffrey A.; Wang, Carol A.; Newnham, John P.; Pennell, Craig E.	2015	JOURNAL OF REPRODUCTIVE IMMUNOLOGY	33
	20	RCT	Oral health education and therapy reduces gingivitis during pregnancy	10.1111/jcpe.12188	Geisinger, Maria L.; Geurs, Nicolaas C.; Bain, Jennifer L.; Kaur, Maninder; Vassilopoulos, Philip J.; Cliver, Suzanne P.; Hauth, John C.; Reddy, Michael S.	2014	JOURNAL OF CLINICAL PERIODONTOLOGY	30
	21	RCT	Periodontal disease: a potential modifiable risk factor limiting conception	10.1093/humrep/des034	Hart, Roger; Doherty, Dorota A.; Pennell, Craig E.; Newnham, Ian A.; Newnham, John P.	2012	HUMAN REPRODUCTION	30
	22	RCT	Effect of nonsurgical periodontal therapy and strict plaque control on preterm/low birth weight: a randomized controlled clinical trial	10.1007/s00784-012-0679-3	Weidlich, Patricia; Moreira, Carlos Heitor C.; Fiorini, Tiago; Musskopf, Marta L.; da Rocha, Jose M.; Oppermann, Maria Lucia R.; Aass, Anne M.; Gjermo, Per; Susin, Cristiano; Roesing, Cassiano K.; Oppermann, Rui V.	2013	CLINICAL ORAL INVESTIGATIONS	29
	23	RCT	Periodontal treatment among mothers with mild to moderate periodontal disease and preterm birth: reanalysis of OPT trial data accounting for selective survival	10.1093/ije/dyy089	Merchant, Anwar T.; Sutherland, Melanie W.; Liu, Jihong; Pitiphat, Waranuch; Dasanayake, Ananda	2018	INTERNATIONAL JOURNAL OF EPIDEMIOLOGY	26
	24	RCT	Intrapregnancy Non-Surgical Periodontal Treatment and Pregnancy Outcome: A Randomized Controlled Trial	10.1902/jop.2012.120572	Pirie, Martina; Linden, Gerard; Irwin, Christopher	2013	JOURNAL OF PERIODONTOLOGY	25
	25	RCT	Association of a Common Genetic Factor, <i>PTGER3</i>, With Outcome of Periodontal Therapy and Preterm Birth	10.1902/jop.2013.130006	Jeffcoat, Marjorie K.; Jeffcoat, Robert L.; Tanna, Nipul; Parry, Samuel H.	2014	JOURNAL OF PERIODONTOLOGY	17
	26	RCT	Prevention of Preterm Delivery with Periodontal Treatment	10.1159/000221378	Novak, Tibor; Radnai, Marta; Gorzo, Istvan; Urban, Edit; Orvos, Hajnalka; Eller, Jozsef; Pal, Attila	2009	FETAL DIAGNOSIS AND THERAPY	17
	27	RCT	Non-Surgical Treatment of Periodontal Disease in a Pregnant Caucasian Women Population: Adverse Pregnancy Outcomes of a Randomized Clinical Trial	10.3390/ijerph16193638	Caneiro-Queija, Leticia; Lopez-Carral, Jose; Martin-Lancharro, Pablo; Limeres-Posse, Jacobo; Diz-Dios, Pedro; Blanco-Carrion, Juan	2019	INTERNATIONAL JOURNAL OF ENVIRONMENTAL RESEARCH AND PUBLIC HEALTH	15
	28	RCT	The effect of phase-I periodontal therapy on pregnancy outcome in chronic periodontitis patients	10.3109/01443615.2013.829029	Reddy, B. V. Ramesh; Tanneeru, S.; Chava, V. K.	2014	JOURNAL OF OBSTETRICS AND GYNAECOLOGY	15
	29	RCT	Use of antiseptic mouthrinse during pregnancy and pregnancy outcomes: a randomised controlled clinical trial in rural China	10.1111/1471-0528.14010	Jiang, H.; Xiang, X.; Su, Y.; Peng, J.; Zhu, X.; Wang, J.; Chen, M.; Qian, X.	2016	BJOG-AN INTERNATIONAL JOURNAL OF OBSTETRICS AND GYNAECOLOGY	12
	30	RCT	Use of mouth rinse during pregnancy to improve birth and neonatal outcomes: a randomized controlled trial	10.1186/s12884-015-0761-3	Jiang, Hong; Xiong, Xu; Buekens, Pierre; Su, Yi; Qian, Xu	2015	BMC PREGNANCY AND CHILDBIRTH	10
	31	RCT	Calcium and vitamin D supplementation and/or periodontal therapy in the treatment of periodontitis among Brazilian pregnant women: protocol of a feasibility randomised controlled trial (the IMPROVE trial)	10.1186/s40814-019-0417-6	Cocate, Paula Guedes; Kac, Gilberto; Heitmann, Berit L.; Nadanovsky, Paulo; da Veiga Soares Carvalho, Maria Claudia; Benaim, Camila; Schlussel, Michael Maia; Trindade de Castro, Maria Beatriz; Alves-Santos, Nadya Helena; Baptista, Amanda Farnum; Holick, Michael F.; Mokhtar, Rana R.; Bomfim, Alessandra Raymundo; Amorim Adegboye, Amanda Rodrigues	2019	PILOT AND FEASIBILITY STUDIES	9
	32	RCT	Adherence to and acceptability of three alcohol-free, antiseptic oral rinses: A community-based pilot randomized controlled trial among pregnant women in rural Nepal	10.1111/cdoe.12562	Erchick, Daniel J.; Agrawal, Nitin K.; Khatry, Subarna K.; Katz, Joanne; LeClerq, Steven C.; Reynolds, Mark A.; Mullany, Luke C.	2020	COMMUNITY DENTISTRY AND ORAL EPIDEMIOLOGY	5
	33	RCT	Periodontal treatment outcomes during pregnancy and postpartum	10.1007/s00784-014-1386-z	Cunha Moreira, Carlos Heitor; Weidlich, Patricia; Fiorini, Tiago; da Rocha, Jose Mariano; Musskopf, Marta Liliana; Susin, Cristiano; Oppermann, Rui Vicente; Roesing, Cassiano Kuchenbecker	2015	CLINICAL ORAL INVESTIGATIONS	5
	34	RCT	Evaluation of an advanced oral hygiene regimen on maternity outcomes in a randomized multicenter clinical trial (Oral Hygiene and Maternity Outcomes Multicenter Study)	10.1016/j.ajogmf.2023.100995	Parry, Samuel; Jeffcoat, Marjorie; Reddy, Michael S.; Doyle, Matthew J.; Grender, Julie M.; Gerlach, Robert W.; Tanna, Nipul; Geisinger, Maria L.; Geurs, Nicolaas C.; Biggio, Joseph	2023	AMERICAN JOURNAL OF OBSTETRICS & GYNECOLOGY MFM	3
	35	RCT	Quantile regression to estimate the survivor average causal effect (SACE) of periodontal treatment effects on birthweight and gestational age	10.1002/JPER.20-0376	Merchant, Anwar T.; Liu, Jihong; Reynolds, Mark A.; Beck, James D.; Zhang, Jiajia	2021	JOURNAL OF PERIODONTOLOGY	3
	36	RCT	Effect of Antenatal Treatment of Maternal Periodontitis on Early Childhood Neurodevelopment	10.1055/s-0032-1316449	Matula, Kathleen; Ramamurthy, Rajam; Bose, Carl; Goldstein, Ricki; Couper, David; Peralta-Carcelen, Myriam; Stewart, Dawn; Gustafson, Kathryn E.; Offenbacher, Steven	2012	AMERICAN JOURNAL OF PERINATOLOGY	3
	37	RCT	Effect of Oral Prophylactic Measures on the Occurrence of Pre-Eclampsia (OP-PE) in High-Risk Pregnant Women: A Cluster Randomized Controlled Trial	10.3390/mps4030061	Kanoute, Aida; Gare, Jocelyne; Meda, Nicolas; Viennot, Stephane; Tramini, Paul; Fraticelli, Laurie; Carrouel, Florence; Bourgeois, Denis	2021	METHODS AND PROTOCOLS	2
Comparative Study	1	Comparative Study	The Placenta Harbors a Unique Microbiome	10.1126/scitranslmed.3008599	Aagaard, Kjersti; Ma, Jun; Antony, Kathleen M.; Ganu, Radhika; Petrosino, Joseph; Versalovic, James	2014	SCIENCE TRANSLATIONAL MEDICINE	1732
	2	Comparative Study	Periodontal infections and pre-term birth: early findings from a cohort of young minority women in New York	10.1034/j.1600-0722.2001.00966.x	Mitchell-Lewis, D; Engebretson, SP; Chen, J; Lamster, IB; Papapanou, PN	2001	EUROPEAN JOURNAL OF ORAL SCIENCES	167
	3	Comparative Study	The association between <i>Porphyromonas gingivalis</i>-specific maternal serum IgG and low birth weight	10.1902/jop.2001.72.11.1491	Dasanayake, AP; Boyd, D; Madianos, PN; Offenbacher, S; Hills, E	2001	JOURNAL OF PERIODONTOLOGY	77
	4	Comparative Study	Provider and patient perceptions about dental care during pregnancy	10.1080/14767050701796681	Strafford, Katherine E.; Shellhaas, Cynthia; Hade, Erinn M.	2008	JOURNAL OF MATERNAL-FETAL & NEONATAL MEDICINE	74
	5	Comparative Study	Evolution of Invasion in a Diverse Set of <i>Fusobacterium</i> Species	10.1128/mBio.01864-14	McGuire, Abigail Manson; Cochrane, Kyla; Griggs, Allison D.; Haas, Brian J.; Abeel, Thomas; Zeng, Qiandong; Nice, Justin B.; MacDonald, Hanlon; Birren, Bruce W.; Berger, Bryan W.; Allen-Vercoe, Emma; Earl, Ashlee M.	2014	MBIO	73
	6	Comparative Study	Does Pregnancy Have an Impact on the Subgingival Microbiota?	10.1902/jop.2009.080012	Adriaens, Laurence A.; Alessandri, Regina; Spoerri, Stefan; Lang, Niklaus P.; Persson, G. Rutger	2009	JOURNAL OF PERIODONTOLOGY	71
	7	Comparative Study	Sonoporation is an efficient tool for intracellular fluorescent dextran delivery and one-step double-crossover mutant construction in <i>Fusobactetium nucleatum</i>	10.1128/AEM.00428-07	Han, Yiping W.; Ikegami, Akihiko; Chung, Peter; Zhang, Lei; Deng, Cheri X.	2007	APPLIED AND ENVIRONMENTAL MICROBIOLOGY	48
	8	Comparative Study	Systemic Immune Responses in Pregnancy and Periodontitis: Relationship to Pregnancy Outcomes in the Obstetrics and Periodontal Therapy (OPT) Study	10.1902/jop.2009.080464	Ebersole, Jeffrey L.; Novak, M. John; Michalowicz, Bryan S.; Hodges, James S.; Steffen, Michelle J.; Ferguson, James E.; DiAngelis, Anthony; Buchanan, William; Mitchell, Dennis A.; Papapanou, Panos N.	2009	JOURNAL OF PERIODONTOLOGY	45
	9	Comparative Study	Increased infection with key periodontal pathogens during gestational diabetes mellitus	10.1111/jcpe.12418	Gogeneni, Himabindu; Buduneli, Nurcan; Ceyhan-Ozturk, Banu; Gumus, Pinar; Akcali, Aliye; Zeller, Iris; Renaud, Diane E.; Scott, David A.; Ozcaka, Ozgun	2015	JOURNAL OF CLINICAL PERIODONTOLOGY	38
	10	Comparative Study	The association between maternal periodontitis and low birth weight infants among Malay women	10.1111/j.1600-0528.2007.00383.x	Saddki, Norkhafizah; Bachok, Norsa'adah; Hussain, Nik Hazlina Nik; Zainudin, Siti Lailatul Akmar; Sosroseno, Wihaskoro	2008	COMMUNITY DENTISTRY AND ORAL EPIDEMIOLOGY	37
	11	Comparative Study	Factors Affecting Utilization of Dental Services During Pregnancy	10.1902/jop.2014.140235	Amin, Maryam; ElSalhy, Mohamed	2014	JOURNAL OF PERIODONTOLOGY	34
	12	Comparative Study	Periodontal disease early in pregnancy is associated with maternal systemic inflammation among African American women	10.1902/jop.2008.070655	Horton, Amanda L.; Boggess, Kim A.; Moss, Kevin L.; Jared, Heather L.; Beck, James; Offenbachert, Steven	2008	JOURNAL OF PERIODONTOLOGY	34
	13	Comparative Study	Oral bacteria in placental tissues: increased molecular detection in pregnant periodontitis patients	10.1111/odi.12364	Blanc, V.; O'Valle, F.; Pozo, E.; Puertas, A.; Leon, R.; Mesa, F.	2015	ORAL DISEASES	33
	14	Comparative Study	Use of alcohol-free antimicrobial mouth rinse is associated with decreased incidence of preterm birth in a high-risk population	10.1016/j.ajog.2011.07.016	Jeffcoat, Marjorie; Parry, Samuel; Gerlach, Robert W.; Doyle, Matthew J.	2011	AMERICAN JOURNAL OF OBSTETRICS AND GYNECOLOGY	31
	15	Comparative Study	Association Between Obesity and Periodontitis in Pregnant Females	10.1902/jop.2014.130578	Lee, Hyo-Jin; Jun, Jong-Kwan; Lee, Seung-Mi; Ha, Jung-Eun; Paik, Dai-Il; Bae, Kwang-Hak	2014	JOURNAL OF PERIODONTOLOGY	29
	16	Comparative Study	Periodontal treatment during pregnancy decreases the rate of adverse pregnancy outcome: a controlled clinical trial	10.1590/S1678-77572011000200009	Passanezi Sant'Ana, Adriana Campos; de Campos, Marinele R.; Passanezi, Selma Campos; Rubo de Rezende, Maria Lucia; Aguiar Greghi, Sebastiao Luiz; Passanezi, Euloir	2011	JOURNAL OF APPLIED ORAL SCIENCE	23
	17	Comparative Study	Role of Periodontal Bacteria, Viruses, and Placental <i>mir155</i> in Chronic Periodontitis and Preeclampsia-A Genetic Microbiological Study	10.3390/cimb43020060	Mahendra, Jaideep; Mahendra, Little; Mugri, Maryam H.; Sayed, Mohammed E.; Bhandi, Shilpa; Alshahrani, Rahaf Turki; Balaji, Thodur Madapusi; Varadarajan, Saranya; Tanneeru, Swetha; Rao, Abirami Nayaki P.; Srinivasan, Sruthi; Reda, Rodolfo; Testarelli, Luca; Patil, Shankargouda	2021	CURRENT ISSUES IN MOLECULAR BIOLOGY	22
	18	Comparative Study	Evaluation of the gingival inflammation in pregnancy and postpartum via 25-hydroxy-vitamin D3, prostaglandin E<sub>2</sub> and TNF-α levels in saliva	10.1016/j.archoralbio.2015.11.018	Gumus, Pinar; Ozturk, V. Ozgen; Bozkurt, Emir; Emingil, Gulnur	2016	ARCHIVES OF ORAL BIOLOGY	22
	19	Comparative Study	A comparison of dental service use among commercially insured women in Minnesota before, during and after pregnancy	10.14219/jada.archive.2008.0332	Jiang, Pellel; Bargman, Eric P.; Garrett, Nancy A.; DeVries, Andrea; Springman, Steve; Riggs, Sheila	2008	JOURNAL OF THE AMERICAN DENTAL ASSOCIATION	14
	20	nonrandomized intervention study	Periodontal therapy for pregnant women and cases of low birthweight: An intervention study	10.1111/j.1442-200X.2009.02888.x	Cruz, Simone S.; Costa, Maria da Conceicao N.; Gomes-Filho, Isaac S.; Barreto, Mauricio L.; dos Santos, Carlos Antonio S. T.; Martins, Angela Guimaraes; Passos, Johelle de S.; de Freitas, Camila Oliveira T.; Sampaio, Fabio P.; Cerqueira, Eneida de M. M.	2010	PEDIATRICS INTERNATIONAL	12
	21	nonrandomized intervention study	Periodontal Therapy and Low Birth Weight: Preliminary Results From an Alternative Methodologic Strategy	10.1902/jop.2010.100041	Gomes-Filho, Isaac S.; Cruz, Simone S.; Costa, Maria da Conceicao N.; Passos, Johelle S.; Cerqueira, Eneida M. M.; Sampaio, Fabio P.; Pereira, Eliesita C.; Miranda, Lituania F.	2010	JOURNAL OF PERIODONTOLOGY	11
	22	Comparative Study	Longitudinal study on clinical and microbial analysis of periodontal status in pregnancy	10.1590/1807-3107BOR-2016.vol30.0087	Machado, Fernanda Campos; Cesar, Dioneia Evangelista; Morais Apolonio, Ana Carolina; Ribeiro, Luiz Claudio; Ribeiro, Rosangela Almeida	2016	BRAZILIAN ORAL RESEARCH	10
	23	Comparative Study	Interieukin-6-174 genotype, periodontal disease and adverse pregnancy outcomes: A pilot study	10.1007/s10875-007-9162-3	Dashash, M.; Nugent, J.; Baker, P.; Tansinda, D.; Blinkhorn, F.	2008	JOURNAL OF CLINICAL IMMUNOLOGY	9
	24	Comparative Study	Subgingival Microbiome in Pregnancy and a Potential Relationship to Early Term Birth	10.3389/fcimb.2022.873683	Yang, Irene; Claussen, Henry; Arthur, Robert Adam; Hertzberg, Vicki Stover; Geurs, Nicolaas; Corwin, Elizabeth J.; Dunlop, Anne L.	2022	FRONTIERS IN CELLULAR AND INFECTION MICROBIOLOGY	8
	25	Comparative Study	Oral Neutrophil Levels: A Screening Test for Oral Inflammatory Load in Pregnancy in a Medical Setting	10.1902/jop.2014.140116	Huda, Sabrina; Doering, Hendrik; Tenenbaum, Howard C.; Whittle, Wendy; Sigal, Michael J.; Glogauer, Michael	2015	JOURNAL OF PERIODONTOLOGY	8
	26	Comparative Study	Birth Weight of Infants of Mothers With Aggressive Periodontitis	10.1902/jop.2011.110192	Schenkein, Harvey A.; Koertge, Thomas E.; Sabatini, Robert; Brooks, Carol N.; Gunsolley, John C.	2012	JOURNAL OF PERIODONTOLOGY	4
	27		Radiological screening of maternal periodontitis for predicting adverse pregnancy and neonatal outcomes	10.1038/s41598-020-78385-0	Heo, Ju Sun; Ahn, Ki Hoon; Park, Jung Soo	2020	SCIENTIFIC REPORTS	3
	28	Comparative Study	Dental Insurance Coverage, Dentist Visiting, and Oral Health Status among Asian Immigrant Women of Childbearing Age in Canada: A Comparative Study	10.3390/healthcare11192666	Li, Qianqian; Du, Meizhi; Knight, John C.; Yi, Yanqing; Wang, Qi; Wang, Peizhong Peter; Zhu, Yun	2023	HEALTHCARE	0
Systematic review	1	systematic review	The effects of waterpipe tobacco smoking on health outcomes: a systematic review	10.1093/ije/dyq002	Akl, Elie A.; Gaddam, Swarna; Gunukula, Sameer K.; Honeine, Roland; Abou Jaoude, Philippe; Irani, Jihad	2010	INTERNATIONAL JOURNAL OF EPIDEMIOLOGY	442		focusing mainly on adults using waterpipes, especially those with specific health issues.	24 studies were eligible for this review, covering a range of health outcomes.	health outcomes such as lung cancer, respiratory illness, low birth weight, and periodontal disease	Waterpipe smoking was significantly associated with lung cancer (OR 2.12; 95% CI 1.32–3.42), respiratory illness (OR 2.3; 95% CI 1.1–5.1), low birth weight (OR 2.12; 95% CI 1.08–4.18), and periodontal disease (OR 3–5). No significant associations were found between waterpipe smoking and bladder cancer, nasopharyngeal cancer, esophageal cancer, oral dysplasia, or infertility, but the confidence in…
	2	systematic review	Periodontal disease and adverse pregnancy outcomes: a systematic review	10.1111/j.1471-0528.2005.00827.x	Xiong, X; Buekens, P; Fraser, WD; Beck, J; Offenbacher, S	2006	BJOG-AN INTERNATIONAL JOURNAL OF OBSTETRICS AND GYNAECOLOGY	369		multiple countries, focusing mainly on pregnant women with periodontal disease, particularly those of low socioeconomic status.	25 studies were identified, including 13 case-control studies, 9 cohort studies, and 3 controlled trials	preterm low birth weight, low birth weight, preterm birth, birth weight by gestational age, miscarriage or pregnancy loss, and pre-eclampsia.	Three clinical trial studies suggest that oral prophylaxis and periodontal treatment can lead to a 57% reduction in preterm low birth weight (pooled RR 0.43; 95% CI 0.24–0.78) and a 50% reduction in preterm births (RR 0.5; 95% CI 0.20–1.30).
	3	systematic review	Health effects associated with waterpipe smoking	10.1136/tobaccocontrol-2014-051908	El-Zaatari, Ziad M.; Chami, Hassan A.; Zaatari, Ghazi S.	2015	TOBACCO CONTROL	261		young people and adolescents	Systematic reviewed multiple studies, including a total of 24 studies covering a range of health outcomes	effects of waterpipe smoking on a variety of health outcomes, such as lung cancer, respiratory illnesses, low birth weight, periodontal disease, bladder cancer, nasopharyngeal cancer, esophageal cancer, oral dysplasia, infertility, and hepatitis C.	Waterpipe smoking is significantly associated with lung cancer, respiratory illnesses, low birth weight, and periodontal disease. There is no significant association with bladder cancer, nasopharyngeal cancer, esophageal cancer, oral dysplasia, or infertility, but the confidence intervals do not exclude significant associations. There is also no significant association between group waterpipe smo…
	4	systematic review	Epidemiology of association between maternal periodontal disease and adverse pregnancy outcomes systematic review	10.1111/jcpe.12063	Ide, Mark; Papapanou, Panos N.	2013	JOURNAL OF CLINICAL PERIODONTOLOGY	243
	5	systematic review	Maternal Active Smoking During Pregnancy and Low Birth Weight in the Americas: A Systematic Review and Meta-analysis	10.1093/ntr/ntw228	da Silva Pereira, Priscilla Perez; da Mata, Fabiana A. F.; Godoy Figueiredo, Ana Claudia; Cordeiro de Andrade, Keitty Regina; Pereira, Maurcio Gomes	2017	NICOTINE & TOBACCO RESEARCH	156
	6	systematic review	Periodontal diseases and the risk of preterm birth and low birth weight: A meta-analysis	10.1902/jop.2005.76.2.161	Khader, YS; Ta'ani, Q	2005	JOURNAL OF PERIODONTOLOGY	146
	7	systematic review	Screening to prevent spontaneous preterm birth: systematic reviews of accuracy and effectiveness literature with economic modelling	10.3310/hta13430	Honest, H.; Forbes, C. A.; Duree, K. H.; Norman, G.; Duffy, S. B.; Tsourapas, A.; Roberts, T. E.; Barton, P. M.; Jowett, S. M.; Hyde, C. J.; Khan, K. S.	2009	HEALTH TECHNOLOGY ASSESSMENT	138
	8	systematic review	Clinical research activity in periodontal medicine: a systematic mapping of trial registers	10.1111/jcpe.12534	Monsarrat, Paul; Blaizot, Alessandra; Kemoun, Philippe; Ravaud, Philippe; Nabet, Cathy; Sixou, Michel; Vergnes, Jean-Noel	2016	JOURNAL OF CLINICAL PERIODONTOLOGY	118
	9	systematic review	Obstetric outcomes after treatment of periodontal disease during pregnancy: systematic review and meta-analysis	10.1136/bmj.c7017	Polyzos, Nikolaos P.; Polyzos, Ilias P.; Zavos, Apostolos; Valachis, Antonis; Mauri, Davide; Papanikolaou, Evangelos G.; Tzioras, Spyridon; Weber, Daniel; Messinis, Ioannis E.	2010	BMJ-BRITISH MEDICAL JOURNAL	118
	10	systematic review	Evidence grade associating periodontitis to preterm birth and/or low birth weight: I. A systematic review of prospective cohort studies	10.1111/j.1600-051X.2011.01755.x	Chambrone, Leandro; Guglielmetti, Mariana Rocha; Pannuti, Claudio Mendes; Chambrone, Luiz Armando	2011	JOURNAL OF CLINICAL PERIODONTOLOGY	104
	11	systematic review	Adverse pregnancy outcomes and periodontitis: A systematic review and meta-analysis exploring potential association	10.3290/j.qi.a34980	Corbella, Stefano; Taschieri, Silvio; Del Fabbro, Massimo; Francetti, Luca; Weinstein, Roberto; Ferrazzi, Enrico	2016	QUINTESSENCE INTERNATIONAL	93
	12	systematic review	Periodontal disease and pregnancy outcomes: State-of-the-science	10.1097/01.ogx.0000279292.63435.40	Xiong, Xu; Buekens, Pierre; Vastardis, Sotirios; Yu, Stera M.	2007	OBSTETRICAL & GYNECOLOGICAL SURVEY	86
	13	systematic review	Effect of periodontal disease treatment during pregnancy on preterm birth incidence: a metaanalysis of randomized trials	10.1016/j.ajog.2008.09.020	Polyzos, Nikolaos P.; Polyzos, Ilias P.; Mauri, Davide; Tzioras, Spyridon; Tsappi, Maria; Cortinovis, Ivan; Casazza, Giovanni	2009	AMERICAN JOURNAL OF OBSTETRICS AND GYNECOLOGY	84
	14	systematic review	Education as a Predictor of Chronic Periodontitis: A Systematic Review with Meta-Analysis Population-Based Studies	10.1371/journal.pone.0021508	Boillot, Adrien; El Halabi, Bechara; Batty, George David; Range, Helene; Czernichow, Sebastien; Bouchard, Philippe	2011	PLOS ONE	83
	15	systematic review	Oral health promotion interventions during pregnancy: a systematic review	10.1111/cdoe.12167	Vamos, Cheryl A.; Thompson, Erika L.; Avendano, Maryouri; Daley, Ellen M.; Quinonez, Rocio B.; Boggess, Kim	2015	COMMUNITY DENTISTRY AND ORAL EPIDEMIOLOGY	81
	16	systematic review	Treating periodontal disease for preventing adverse birth outcomes in pregnant women	10.1002/14651858.CD005297.pub3	Iheozor-Ejiofor, Zipporah; Middleton, Philippa; Esposito, Marco; Glenny, Anne-Marie	2017	COCHRANE DATABASE OF SYSTEMATIC REVIEWS	80
	17	systematic review	Is periodontitis associated with an increased risk of coronary heart disease and preterm and/or low birth weight births?	10.1034/j.1600-051X.29.s3.2.x	Madianos, PN; Bobetsis, GA; Kinane, DF	2002	JOURNAL OF CLINICAL PERIODONTOLOGY	78
	18	systematic review	Maternal periodontitis and preterm birth: Systematic review and meta-analysis	10.1111/cdoe.12450	Manrique-Corredor, Edwar J.; Orozco-Beltran, Domingo; Lopez-Pineda, Adriana; Quesada, Jose A.; Gil-Guillen, Vicente F.; Carratala-Munuera, Concepcion	2019	COMMUNITY DENTISTRY AND ORAL EPIDEMIOLOGY	76
	19	systematic review	Periodontitis and gestational diabetes mellitus: a systematic review and meta-analysis of observational studies	10.1186/s12884-016-1145-z	Abariga, Samuel A.; Whitcomb, Brian W.	2016	BMC PREGNANCY AND CHILDBIRTH	76
	20	systematic review	Evidence grade associating periodontitis with preterm birth and/or low birth weight: II. A systematic review of randomized trials evaluating the effects of periodontal treatment	10.1111/j.1600-051X.2011.01761.x	Chambrone, Leandro; Pannuti, Claudio Mendes; Guglielmetti, Mariana Rocha; Chambrone, Luiz Armando	2011	JOURNAL OF CLINICAL PERIODONTOLOGY	73
	21	systematic review	Periodontal disease as a risk factor for adverse pregnancy outcomes: a systematic review and meta-analysis of case-control studies	10.1007/s10266-011-0036-z	Corbella, Stefano; Taschieri, Silvio; Francetti, Luca; De Siena, Francesca; Del Fabbro, Massimo	2012	ODONTOLOGY	72
	22	systematic review	Scaling and Root Planing Treatment for Periodontitis to Reduce Preterm Birth and Low Birth Weight: A Systematic Review and Meta-Analysis of Randomized Controlled Trials	10.1902/jop.2012.110636	Kim, Arthur J.; Lo, Alexander J.; Pullin, Deborah A.; Thornton-Johnson, Darneesh S.; Karimbux, Nadeem Y.	2012	JOURNAL OF PERIODONTOLOGY	64
	23	systematic review	Impact of the treatment of periodontitis on systemic health and quality of life: A systematic review	10.1111/jcpe.13554	Orlandi, Marco; Munoz Aguilera, Eva; Marletta, Debora; Petrie, Aviva; Suvan, Jean; D'Aiuto, Francesco	2022	JOURNAL OF CLINICAL PERIODONTOLOGY	58
	24	systematic review	Reducing stillbirths: prevention and management of medical disorders and infections during pregnancy	10.1186/1471-2393-9-S1-S4	Menezes, Esme V.; Yakoob, Mohammad Yawar; Soomro, Tanya; Haws, Rachel A.; Darmstadt, Gary L.; Bhutta, Zulfiqar A.	2009	BMC PREGNANCY AND CHILDBIRTH	56
	25	systematic review	Oral microflora and pregnancy: a systematic review and meta-analysis	10.1038/s41598-021-96495-1	Jang, Hoonji; Patoine, Alexa; Wu, Tong Tong; Castillo, Daniel A.; Xiao, Jin	2021	SCIENTIFIC REPORTS	55
	26	systematic review	Periodontal disease and pre-eclampsia: a systematic review	10.1111/j.1600-051X.2010.01636.x	Kunnen, Alina; van Doormaal, Jasper J.; Abbas, Frank; Aarnoudse, Jan G.; van Pampus, Maria G.; Faas, Marijke M.	2010	JOURNAL OF CLINICAL PERIODONTOLOGY	49
	27	systematic review	The effects of periodontal treatment on pregnancy outcomes	10.1111/jcpe.12081	Michalowicz, Bryan S.; Gustafsson, Anders; Thumbigere-Math, Vivek; Buhlin, Kare	2013	JOURNAL OF CLINICAL PERIODONTOLOGY	48
	28	systematic review	Primary and secondary prevention of preterm birth: a review of systematic reviews and ongoing randomized controlled trials	10.1016/j.ejogrb.2018.12.022	Matei, Anca; Saccone, Gabriele; Vogel, Joshua P.; Armson, Anthony B.	2019	EUROPEAN JOURNAL OF OBSTETRICS & GYNECOLOGY AND REPRODUCTIVE BIOLOGY	47
	29	systematic review	The Effect of Periodontal Therapy on Preterm Low Birth Weight <i>A Meta</i>-<i>Analysis</i>	10.1097/AOG.0b013e3181fdebc0	Fogacci, Mariana Fampa; Vettore, Mario Vianna; Thome Leao, Anna Thereza	2011	OBSTETRICS AND GYNECOLOGY	44
	30	systematic review	Relationship between Periodontitis and Pre-Eclampsia: A Meta-Analysis	10.1371/journal.pone.0071387	Sgolastra, Fabrizio; Petrucci, Ambra; Severino, Marco; Gatto, Roberto; Monaco, Annalisa	2013	PLOS ONE	40
	31	systematic review	The effectiveness of periodontal disease treatment during pregnancy in reducing the risk of experiencing preterm birth and low birth weight A meta-analysis	10.14219/jada.archive.2010.0104	Uppal, Anna; Uppal, Shitanshu; Pinto, Andres; Dutta, Moushumi; Shrivatsa, Shwetha; Dandolu, Vani; Mupparapu, Mel	2010	JOURNAL OF THE AMERICAN DENTAL ASSOCIATION	38
	32	systematic review	Periodontal Treatment for Preventing Adverse Pregnancy Outcomes: A Meta- and Trial Sequential Analysis	10.1371/journal.pone.0129060	Schwendicke, Falk; Karimbux, Nadeem; Allareddy, Veerasathpurush; Gluud, Christian	2015	PLOS ONE	36
	33	systematic review	Effect of intra-pregnancy nonsurgical periodontal therapy on inflammatory biomarkers and adverse pregnancy outcomes: a systematic review with meta-analysis	10.1186/s13643-017-0587-3	Cardoso da Silva, Helbert Eustaquio; Stefani, Cristine Miron; Melo, Nilce de Santos; de Lima, Adriano de Almeida; Rosing, Cassiano Kuchenbecker; Porporatti, Andre Luis; Canto, Graziela De Luca	2017	SYSTEMATIC REVIEWS	33
	34	systematic review	Effect of periodontal treatment on preterm birth rate: a systematic review of meta-analyses	10.1111/prd.12073	Lopez, Nestor J.; Uribe, Sergio; Martinez, Benjamin	2015	PERIODONTOLOGY 2000	33
	35	systematic review	Periodontal disease and perinatal outcomes	10.1007/s00404-010-1774-9	Matevosyan, Naira Roland	2011	ARCHIVES OF GYNECOLOGY AND OBSTETRICS	31
	36	systematic review	Periodontitis and risk of preterm birth and low birthweight - a meta-analysis	PMID: 22880465	Konopka, Tomasz; Paradowska-Stolarz, Anna	2012	GINEKOLOGIA POLSKA	29
	37	systematic review	Effect of periodontal treatment in pregnancy on perinatal outcomes: a systematic review and meta-analysis	10.1080/14767058.2019.1678142	Bi, Wei Guang; Emami, Elham; Luo, Zhong-Cheng; Santamaria, Christina; Wei, Shu Qin	2021	JOURNAL OF MATERNAL-FETAL & NEONATAL MEDICINE	27
	38	systematic review	Treatment of Periodontal Disease and Prevention of Preterm Birth: Systematic Review and Meta-analysis	10.1055/s-0032-1329687	Boutin, Amelie; Demers, Suzanne; Roberge, Stephanie; Roy-Morency, Amelie; Chandad, Fatiha; Bujold, Emmanuel	2013	AMERICAN JOURNAL OF PERINATOLOGY	27
	39	systematic review	The association between apical periodontitis and adverse pregnancy outcomes: a systematic review	10.1111/iej.13538	Jakovljevic, A.; Sljivancanin Jakovljevic, T.; Duncan, H. F.; Nagendrababu, V.; Jacimovic, J.; Aminoshariae, A.; Milasin, J.; Dummer, P. M. H.	2021	INTERNATIONAL ENDODONTIC JOURNAL	26
	40	systematic review	Periodontal disease treatment and risk of preterm birth: a systematic review and meta-analysis	10.1590/S0102-311X2012001000002	da Rosa, Maria Ines; Simoes Pires, Patricia Duarte; Medeiros, Lidia Rosi; Edelweiss, Maria Isabel; Martinez-Mesa, Jeovany	2012	CADERNOS DE SAUDE PUBLICA	22
	41	systematic review	GAPS IN KNOWLEDGE ABOUT THE ASSOCIATION BETWEEN MATERNAL PERIODONTITIS AND ADVERSE OBSTETRIC OUTCOMES: AN UMBRELLA REVIEW	10.1016/j.jebdp.2017.07.006	Vivares-Builes, Annie M.; Johana Rangel-Rincon, Leidy; Enrique Botero, Javier; Agudelo-Suarez, Andres A.	2018	JOURNAL OF EVIDENCE-BASED DENTAL PRACTICE	20
	42	systematic review	Periodontal Disease and Adverse Neonatal Outcomes: A Systematic Review and Meta-Analysis	10.3389/fped.2022.799740	Zhang, Youzhen; Feng, Wanbing; Li, Jingyu; Cui, Linlin; Chen, Zi-Jiang	2022	FRONTIERS IN PEDIATRICS	15
	43	systematic review	Does Nonsurgical Periodontal Treatment Improve Systemic Health?	10.1177/0022034520965958	Taylor, H. L.; Rahurkar, S.; Treat, T. J.; Thyvalikakath, T. P.; Schleyer, T. K.	2021	JOURNAL OF DENTAL RESEARCH	15
	44	systematic review	Periodontitis and risk for preeclampsia - a systematic review	10.5603/GP.2020.0024	Konopka, Tomasz; Zakrzewska, Aneta	2020	GINEKOLOGIA POLSKA	14
	45	systematic review	AN UMBRELLA REVIEW EXPLORING THE EFFECT OF PERIODONTAL TREATMENT IN PREGNANT WOMEN ON THE FREQUENCY OF ADVERSE OBSTETRIC OUTCOMES	10.1016/j.jebdp.2017.10.011	Johana Rangel-Rincon, Leidy; Vivares-Builes, Annie M.; Enrique Botero, Javier; Agudelo-Suarez, Andres A.	2018	JOURNAL OF EVIDENCE-BASED DENTAL PRACTICE	13
	46	systematic review	Periodontitis and Preeclampsia in Pregnancy: A Systematic Review and Meta-Analysis	10.1007/s10995-022-03556-6	Le, Quynh-Anh; Akhter, Rahena; Coulton, Kimberly Mathieu; Vo, Ngoc Truong Nhu; Duong, Le Thi Yen; Nong, Hoang Viet; Yaacoub, Albert; Condous, George; Eberhard, Joerg; Nanan, Ralph	2022	MATERNAL AND CHILD HEALTH JOURNAL	11
	47	systematic review	Effect of nonsurgical periodontal therapy during gestation period on adverse pregnancy outcome: a systematic review	10.3109/14767058.2013.799662	Shah, Monali; Muley, Arti; Muley, Prasad	2013	JOURNAL OF MATERNAL-FETAL & NEONATAL MEDICINE	11
	48	systematic review	A meta-analysis of randomized controlled trials shows no evidence that periodontal treatment during pregnancy prevents adverse pregnancy outcomes	10.14219/jada.archive.2011.0089	Baccaglini, Lorena	2011	JOURNAL OF THE AMERICAN DENTAL ASSOCIATION	11
	49	systematic review	Periodontal Disease and Pregnancy: Correlation with Underweight Birth	10.1055/s-0042-1757906	Minervini, Giuseppe; Basili, Manuele; Franco, Rocco; Bollero, Patrizio; Mancini, Maura; Gozzo, Lucia; Romano, Giovanni Luca; Marrapodi, Maria Maddalena; Gorassini, Francesca; D'Amico, Cesare; Pedulla, Eugenio; Fiorillo, Luca	2023	EUROPEAN JOURNAL OF DENTISTRY	10
	50	systematic review	Association of Chlorhexidine Use and Scaling and Root Planing With Birth Outcomes in Pregnant Individuals With Periodontitis: A Systematic Review and Meta-analysis	10.1001/jamanetworkopen.2022.47632	Merchant, Anwar T.; Das Gupta, Rajat; Akonde, Maxwell; Reynolds, Mark; Smith-Warner, Stephanie; Liu, Jihong; Tarannum, Fouzia; Beck, James; Mattison, Donald	2022	JAMA NETWORK OPEN	9
	51	systematic review	DIFFERENTIAL IMPACT OF PERIODONTAL TREATMENT STRATEGIES DURING PREGNANCY ON PERINATAL OUTCOMES: A SYSTEMATIC REVIEW AND META-ANALYSIS	10.1016/j.jebdp.2021.101666	Quynh-Anh Le; Eslick, Guy D.; Coulton, Kimberly Mathieu; Akhter, Rahena; Lain, Samantha; Nassar, Natasha; Yaacoub, Albert; Condous, George; Leonardi, Mathew; Eberhard, Jorg; Nanan, Ralph	2022	JOURNAL OF EVIDENCE-BASED DENTAL PRACTICE	7
	52	systematic review	Meta-regression Analysis of Study Heterogeneity for Systemic Outcomes after Periodontal Therapy	10.1177/23800844211070467	Oates, T. W.; Guy, V; Ni, K.; Ji, C.; Saito, H.; Shiau, H.; Shah, R.; Williams, M. A.; Blasi, G.; Goloubeva, O.	2023	JDR CLINICAL & TRANSLATIONAL RESEARCH	7
	53	systematic review	Association between the Risk of Preterm Birth and Low Birth Weight with Periodontal Disease in Pregnant Women: An Umbrella Review	10.3390/dj11030074	Padilla-Caceres, Tania; Arbildo-Vega, Heber Isac; Caballero-Apaza, Luz; Cruzado-Oliva, Fredy; Mamani-Cori, Vilma; Cervantes-Alagon, Sheyla; Munayco-Pantoja, Evelyn; Panda, Saurav; Vasquez-Rodrigo, Hernan; Castro-Mejia, Percy; Huaita-Acha, Delsi	2023	DENTISTRY JOURNAL	6
	54	systematic review	Adverse Pregnancy Outcomes and Maternal Periodontal Disease: An Overview on Meta-Analytic and Methodological Quality	10.3390/jcm12113635	Machado, Vanessa; Ferreira, Madalena; Lopes, Luisa; Mendes, Jose Joao; Botelho, Joao	2023	JOURNAL OF CLINICAL MEDICINE	5
	55	systematic review	Treatment of periodontal disease in pregnancy for the prevention of adverse pregnancy outcomes: a systematic review of systematic reviews	10.47391/JPMA.6432	Khan, Najia Sajjad; Craven, Rebecca; Rafiq, Ayesha; Rafiq, Anam	2023	JOURNAL OF THE PAKISTAN MEDICAL ASSOCIATION	5
	56	systematic review	The Potential Association Between Periodontal Diseases and Adverse Pregnancy Outcomes in Pregnant Women: A Systematic Review of Randomized Clinical Trials	10.7759/cureus.33216	Alnasser, Bashayer H.; Alkhaldi, Njoud K.; Alghamdi, Waad K.; Alghamdi, Faisal T.	2023	CUREUS JOURNAL OF MEDICAL SCIENCE	5
	57	systematic review	Does Treatment of Gingivitis During Pregnancy Improve Pregnancy Outcomes? A Systematic Review and Meta-Analysis	10.3290/j.ohpd.b2183059	Lea, Quynh-Anh; Eslickb, Guy D.; Coultonc, Kimberly Mathieu; Akhterd, Rahena; Condouse, George; Eberhard, Jorg; Nanang, Ralph	2021	ORAL HEALTH & PREVENTIVE DENTISTRY	5
	58	systematic review	Unfavourable beliefs about oral health and safety of dental care during pregnancy: a systematic review	10.1186/s12903-023-03439-4	Kamalabadi, Yasaman Mohammadi; Campbell, M. Karen; Zitoun, Natalie M.; Jessani, Abbas	2023	BMC ORAL HEALTH	4
	59	systematic review	The association between periodontal disease and risk of adverse maternal or neonatal outcomes: A systematic review and meta-analysis of analytical observational studies	10.1002/hsr2.1630	Karimi, Newsha; Samiee, Negin; Moradi, Yousef	2023	HEALTH SCIENCE REPORTS	4
	60	systematic review	Unfavourable beliefs about oral health and safety of dental care during pregnancy: a systematic review	10.1186/s12903-023-03439-4	Kamalabadi, Yasaman Mohammadi; Campbell, M. Karen; Zitoun, Natalie M.; Jessani, Abbas	2023	BMC ORAL HEALTH	4
	61	systematic review	Dental Considerations in Pregnancy - A Systematic Review	10.9734/JPRI/2021/v33i40A32224	Bashir, Sana; Menon, Ipseeta; Gupta, Ritu; Sharma, Anubhav; Arora, Vikram; Varshney, Shivangi	2021	JOURNAL OF PHARMACEUTICAL RESEARCH INTERNATIONAL	2
Case reports	1	case reports	Term Stillbirth Caused by Oral <i>Fusobacterium nucleatum</i>	10.1097/AOG.0b013e3181cb9955	Han, Yiping W.; Fardini, Yann; Chen, Casey; Iacampo, Karla G.; Peraino, Victoria A.; Shamonki, Jaime M.; Redline, Raymond W.	2010	OBSTETRICS AND GYNECOLOGY	208
	2	case reports	Localization of <i>P</i>. <i>gingivalis</i> in Preterm Delivery Placenta	10.1177/0022034509338032	Katz, J.; Chegini, N.; Shiverick, K. T.; Lamont, R. J.	2009	JOURNAL OF DENTAL RESEARCH	136
	3	case reports	The origin of <i>Fusobacterium nucleatum</i> involved in intra-amniotic infection and preterm birth	10.3109/14767058.2010.550977	Gauthier, Simon; Tetu, Amelie; Himaya, Eric; Morand, Marianne; Chandad, Fatiha; Rallu, Fabien; Bujold, Emmanuel	2011	JOURNAL OF MATERNAL-FETAL & NEONATAL MEDICINE	48
	4	case reports	Maternal septicemia caused by <i>Streptococcus mitis</i>: a possible link between intra-amniotic infection and periodontitis. Case report and literature review	10.1186/s12879-022-07530-z	Chaemsaithong, Piya; Lertrut, Waranyu; Kamlungkuea, Threebhorn; Santanirand, Pitak; Singsaneh, Arunee; Jaovisidha, Adithep; Pakdeeto, Sasikarn; Mongkolsuk, Paninee; Pongchaikul, Pisut	2022	BMC INFECTIOUS DISEASES	7
	5	case reports	Recurrent miscarriage in a woman with congenital factor V deficiency: a case report	10.1186/s12884-022-05273-y	Shirzadi, Mohammad; Radfar, Amir Hossein; Dehghani, Mehdi	2022	BMC PREGNANCY AND CHILDBIRTH	0

## Sheet: Sheet2
Sheet2：For specific research design ( Animal study, Cross-sectional study, Prospective cohort study, Case-control study, RCT ( intervention study ), Systematic review ), the first three articles with the highest number of citations were collated.
Study type	Reference	DOI	Year	Citations	Model of periodontitis/ Characteristics of population	Sample size	Parameter evaluation/ outcome indicators	Main findings
Animal study	Han et al	10.1128/IAI.72.4.2272-2279.2004	2004	311	(F. nucleatum) was directly injected via the tail vein into pregnant CF-1 mice	each groups of 3 to 12 pregnant mice to determine the LD50 (median lethal dose)	fetal death rate, stillbirth rate, and the distribution and quantity of F. nucleatum in the mouse placenta, liver, spleen, amniotic fluid, and fetuses	F. nucleatum could cause premature birth, stillbirth, and non-sustained live births in mice, with infection localized within the uterus without systemic spread. F. nucleatum was first detected in placental blood vessels and then spread to amniotic fluid, mimicking the pattern of human infection.	0
	Fardini et al	10.1128/IAI.01395-09	2010	191	pooled oral bacterial samples, including saliva and subgingival plaque, were injected into pregnant mice via the tail vein to mimic bacteremia	Saliva samples were injected into seven pregnant mice, and subgingival plaque samples were injected into ten pregnant mice	The colonization of oral bacteria in murine placentas was evaluated using 16S rRNA gene-based PCR and clone library analysis, along with a variety of bacterial species associated with adverse pregnancy outcomes in humans	a diverse group of oral bacteria can translocate to the murine placenta via hematogenous transmission, many of which are associated with adverse pregnancy outcomes in humans, including preterm birth. Additionally, several species were selectively "enriched" during translocation, with higher prevalence in the placenta than in the pooled saliva or subgingival plaque samples	0
	Gayle et al	10.1152/ajpregu.00664.2003	2004	177	intraperitoneal injections of lipopolysaccharide (LPS) in pregnant rats	a total of 32 pups analyzed per group	Cytokine protein levels in maternal serum and amniotic fluid were determined by ELISA, and mRNA levels in the placenta, chorioamnion, and fetal brain were measured by real-time RT-PCR	maternal LPS injection induced changes in the mRNA and protein levels of proinflammatory cytokines (IL-1β, IL-6, TNF-α) and the anti-inflammatory cytokine (IL-10) in maternal serum and amniotic fluid. Additionally, LPS induced upregulation of the stress-related peptide corticotropin-releasing factor (CRF) mRNA in the fetal brain	0
Cross-sectional study	Al Habashneh et al	10.1111/j.1600-051X.2005.00739.x	2005	93	women who gave birth < 35 years old	625 women	knowledge, behaviors, attitudes toward dental care during pregnancy, and personal, demographic, and pregnancy-related factors using a structured questionnaire.The main dependent variable was the utilization of dental services during pregnancy, dichotomized as whether or not the women had a dental visit during pregnancy	Factors significantly associated with reporting dental visits during pregnancy included: personal factors (being married, greater frequency of visiting the dentist when not pregnant, and use of inter-proximal cleaning aids), financial factors (dental insurance), and knowledge of the possible connection between oral health and pregnancy outcomes.	0
	Dinas et al	10.1080/00016340701371413	2007	60	women who gave birth had an educational level of elementary or high school (91.3%), and belonged to the lower or middle economic class (98.6%)	425 women	symptoms of gingivitis, dental visits during pregnancy, and perceptions of the safety of dental treatment during pregnancy by anonymous questionnaire	Pregnancy gingivitis was independently associated with non-Greek ethnicity (p<0.008), multiparity (p<0.005), lower economic class (p<0.001), and lack of routine primary dental care (p<0.005) and dental treatment during pregnancy is safe were both independently associated with visiting a dentist during pregnancy (p<0.0005).	0
	Lunardelli	10.1111/j.1600-051X.2005.00759.x	2005	59	aged between 15 and 40 years old and having at least 18 natural teeth	376 women, which was increased to 447 to account for potential losses and refusals.	low birth weight, prematurity, and prematurity and/or low birth weight	no statistically significant association between periodontal disease and low birth weight. There was no association between periodontal pockets and low birth weight and/or pre-term birth even after adjusting for maternal education, parity, number of previous children with low birth weight, number of pre-natal consultations, and body mass index	0
Prospective cohort study	Jeffcoat et al	10.14219/jada.archive.2001.0299	2001	338	periodontal, medical, and behavioral assessments between 21 and 24 weeks of gestation	1,313 pregnant women	the presence and severity of periodontal disease in relation to preterm birth, adjusted for smoking, parity, race, and maternal age.	an association between the presence of periodontitis at 21 to 24 weeks’ gestation and subsequent preterm birth.	0
	Offenbacher et al	10.1097/01.AOG.0000190212.87012.96	2006	240	pregnant women who received both antepartum and postpartum periodontal examinations	1,020 pregnant women	the risk of preterm (less than 37 weeks) and very preterm (less than 32 weeks) births, as well as the risk of preterm birth associated with the severity and progression of periodontal disease	the progression of periodontal disease during pregnancy was associated with an increased risk of very preterm birth, independently of traditional obstetric, periodontal, and social domain risk factors	0
	Moore et al	10.1038/sj.bdj.4811620	2004	157	Participants completed questionnaires and underwent periodontal examinations	3,738 subjects	plaque and bleeding scores, probing pocket depth, and loss of attachment. Pregnancy outcome data collected included gestational age and birth weight at delivery	no significant relationships between the severity of periodontal disease and either preterm birth (PTB) or low birth weight (LBW). In contrast, there appeared to be a correlation between poorer periodontal health and those experiencing a late miscarriage	0
Case-control study	Davenport et al	10.1177/154405910208100505	2002	191	age group of 20-29 years old, with primary education level being secondary schoo	236 cases of preterm low birth weight (PLBW) infants and 507 controls	clinical periodontal indices such as pocket depth, level of inflammation, Community Periodontal Index of Treatment Need (CPITN), and attachment loss, as well as risk factors for periodontal disease and PLBW ascertained through structured questionnaires and maternity records	PLBW decreased with increasing pocket depth, and this trend remained after controlling for maternal age, ethnicity, education, smoking, alcohol consumption, infections during pregnancy, and hypertension. The results do not support an association between periodontal disease and PLBW.	0
	Goepfert et al	10.1097/01.AOG.0000139836.47777.6d	2004	140	three groups: spontaneous preterm birth group (less than 32 weeks, n=59), indicated preterm birth group (less than 32 weeks, n=36), and term birth group (more than 37 weeks, n=44)	139 mother-infant pairs: 59 in the spontaneous preterm birth group, 36 in the indicated preterm birth group, and 44 in the term birth group	the severity of periodontal disease (defined by the degree of attachment loss), cultures of the placenta and umbilical cord blood, interleukin-6 levels in cord blood, and histopathologic examination of the placenta.	Multivariable analyses showed that severe periodontal disease was associated with spontaneous preterm birth (adjusted odds ratio 3.4, 95% confidence interval 1.5-7.7), but not significantly associated with selected markers of upper genital tract inflammation.	0
	Contreras et al	10.1902/jop.2006.050020	2006	119	women between 26 to 36 weeks of pregnancy with low socioeconomic status, with the majority having a secondary education level	373 pregnant women, with 130 in the preeclamptic group and 243 in the nonpreeclamptic group	sociodemographic data, obstetric risk factors, periodontal status, and subgingival microbial composition	Chronic periodontal disease and the presence of P. gingivalis, T. forsythensis, and E. corrodens were signifi-cantly associated with preeclampsia in pregnant women	0
RCT (intervention study)	Michalowicz et al	10.1056/NEJMoa062249	2006	360	pregnant women who were at least 16 years old and less than 16 weeks and 6 days of gestation	823 patients were randomly assigned to two groups, with 413 in the treatment group and 410 in the control group	The primary prespecified outcome was the gestational age at the end of pregnancy. Secondary outcomes included birth weight, the proportion of infants who were small for gestational age, Apgar scores, and admissions to a neonatal intensive care unit	Periodontal treatment improved clinical measures of periodontal disease but did not significantly alter the rates of preterm birth, low birth weight, or fetal growth restriction.	0
	López et al	10.1902/jop.2002.73.8.911	2002	350	pregnant women aged 18 to 35 diagnosed with periodontal disease, receiving prenatal care	400 women, randomly assigned to an experimental group (200) and a control group (200)	The primary outcomes assessed were delivery before 37 weeks of gestation or an infant weighing less than 2,500 g	Periodontal disease was the strongest factor related to preterm low birth weight. The study concluded that periodontal therapy significantly reduced the rates of preterm low birth weight in women with periodontal disease	0
	Jeffcoat et al	10.1902/jop.2003.74.8.1214	2003	256	pregnant women with periodontitis between 21 and 25 weeks' gestation.	366 women, divided into three treatment groups: 1) dental prophylaxis plus placebo; 2) scaling and root planing (SRP) plus placebo; 3) SRP plus metronidazole	preterm birth rates at less than 37 weeks and less than 35 weeks' gestation.	performing SRP in pregnant women with periodontitis may reduce preterm birth in this population, and adjunctive metronidazole therapy did not improve pregnancy outcomes	0
Systematic review	Akl er al	10.1093/ije/dyq002	2010	442	focusing mainly on adults using waterpipes, especially those with specific health issues.	24 studies were eligible for this review, covering a range of health outcomes.	health outcomes such as lung cancer, respiratory illness, low birth weight, and periodontal disease	Waterpipe smoking was significantly associated with lung cancer (OR 2.12; 95% CI 1.32–3.42), respiratory illness (OR 2.3; 95% CI 1.1–5.1), low birth weight (OR 2.12; 95% CI 1.08–4.18), and periodontal disease (OR 3–5). No significant associations were found between waterpipe smoking and bladder cancer, nasopharyngeal cancer, esophageal cancer, oral dysplasia, or infertility, but the confidence in…	0
	Xiong, X et al	10.1111/j.1471-0528.2005.00827.x	2006	369	multiple countries, focusing mainly on pregnant women with periodontal disease, particularly those of low socioeconomic status.	25 studies were identified, including 13 case-control studies, 9 cohort studies, and 3 controlled trials	preterm low birth weight, low birth weight, preterm birth, birth weight by gestational age, miscarriage or pregnancy loss, and pre-eclampsia.	Three clinical trial studies suggest that oral prophylaxis and periodontal treatment can lead to a 57% reduction in preterm low birth weight (pooled RR 0.43; 95% CI 0.24–0.78) and a 50% reduction in preterm births (RR 0.5; 95% CI 0.20–1.30).	0
	El-Zaatari et al	10.1136/tobaccocontrol-2014-051908	2015	261	young people and adolescents	Systematic reviewed multiple studies, including a total of 24 studies covering a range of health outcomes	effects of waterpipe smoking on a variety of health outcomes, such as lung cancer, respiratory illnesses, low birth weight, periodontal disease, bladder cancer, nasopharyngeal cancer, esophageal cancer, oral dysplasia, infertility, and hepatitis C.	Waterpipe smoking is significantly associated with lung cancer, respiratory illnesses, low birth weight, and periodontal disease. There is no significant association with bladder cancer, nasopharyngeal cancer, esophageal cancer, oral dysplasia, or infertility, but the confidence intervals do not exclude significant associations. There is also no significant association between group waterpipe smo…	0
Study type	Title	DOI	First Author	Year	Journal	Citations
Animal study	<i>Fusobacterium nucleatum</i> induces premature and term stillbirths in pregnant mice:: Implication of oral bacteria in preterm birth	10.1128/IAI.72.4.2272-2279.2004	Han, YPW	2004	INFECTION AND IMMUNITY	311
	Transmission of Diverse Oral Bacteria to Murine Placenta: Evidence for the Oral Microbiome as a Potential Source of Intrauterine Infection	10.1128/IAI.01395-09	Fardini, Yann	2010	INFECTION AND IMMUNITY	191
	Maternal LPS induces cytokines in the amniotic fluid and corticotropin releasing hormone in the fetal rat brain	10.1152/ajpregu.00664.2003	Gayle, DA	2004	AMERICAN JOURNAL OF PHYSIOLOGY-REGULATORY INTEGRATIVE AND COMPARATIVE PHYSIOLOGY	177
Cross-sectional study	Factors related to utilization of dental services during pregnancy	10.1111/j.1600-051X.2005.00739.x	Al Habashneh, R	2005	JOURNAL OF CLINICAL PERIODONTOLOGY	93
	Pregnancy and oral health: utilisation of dental services during pregnancy in northern Greece	10.1080/00016340701371413	Dinas, Konstantinos	2007	ACTA OBSTETRICIA ET GYNECOLOGICA SCANDINAVICA	60
	Is there an association between periodontal disease, prematurity and low birth weight? A population-based study	10.1111/j.1600-051X.2005.00759.x	Lunardelli, AN	2005	JOURNAL OF CLINICAL PERIODONTOLOGY	59
Prospective cohort study	Periodontal infection and preterm birth - Results of a prospective study	10.14219/jada.archive.2001.0299	Jeffcoat, MK	2001	JOURNAL OF THE AMERICAN DENTAL ASSOCIATION	338
	Progressive periodontal disease and risk of very preterm delivery	10.1097/01.AOG.0000190212.87012.96	Offenbacher, S	2006	OBSTETRICS AND GYNECOLOGY	240
	A prospective study to investigate the relationship between periodontal disease and adverse pregnancy outcome	10.1038/sj.bdj.4811620	Moore, S	2004	BRITISH DENTAL JOURNAL	157
Case-control study	Maternal periodontal disease and preterm low birthweight: Case-control study	10.1177/154405910208100505	Davenport, ES	2002	JOURNAL OF DENTAL RESEARCH	191
	Periodontal disease and upper genital tract inflammation in early spontaneous preterm birth	10.1097/01.AOG.0000139836.47777.6d	Goepfert, AR	2004	OBSTETRICS AND GYNECOLOGY	140
	Periodontitis is associated with preeclampsia in pregnant women	10.1902/jop.2006.050020	Contreras, A.	2006	JOURNAL OF PERIODONTOLOGY	119
RCT (intervention study)	Treatment of periodontal disease and the risk of preterm birth	10.1056/NEJMoa062249	Michalowicz, Bryan S.	2006	NEW ENGLAND JOURNAL OF MEDICINE	360
	Periodontal therapy may reduce the risk of preterm low birth weight in women with periodontal disease:: A randomized controlled trial	10.1902/jop.2002.73.8.911	López, NJ	2002	JOURNAL OF PERIODONTOLOGY	350
	Periodontal disease and preterm birth: Results of a pilot intervention study	10.1902/jop.2003.74.8.1214	Jeffcoat, MK	2003	JOURNAL OF PERIODONTOLOGY	256
Systematical review	The effects of waterpipe tobacco smoking on health outcomes: a systematic review	10.1093/ije/dyq002	Akl, Elie A.	2010	INTERNATIONAL JOURNAL OF EPIDEMIOLOGY	442
	Periodontal disease and adverse pregnancy outcomes: a systematic review	10.1111/j.1471-0528.2005.00827.x	Xiong, X	2006	BJOG-AN INTERNATIONAL JOURNAL OF OBSTETRICS AND GYNAECOLOGY	369
	Health effects associated with waterpipe smoking	10.1136/tobaccocontrol-2014-051908	El-Zaatari, Ziad M.	2015	TOBACCO CONTROL	261
